# Supplementary material
Source: MDPI journal article supplement (https://www.mdpi.com/2304-6740/6/4/118)

# checkCIF/PLATON report

You have not supplied any structure factors. As a result the full set of tests cannot be run.

THIS REPORT IS FOR GUIDANCE ONLY. IF USED AS PART OF A REVIEW PROCEDURE FOR PUBLICATION, IT SHOULD NOT REPLACE THE EXPERTISE OF AN EXPERIENCED CRYSTALLOGRAPHIC REFEREE.

No syntax errors found.      CIF dictionary      Interpreting this report

## Datablock: fpycnm

---

|                        |                                                    |                                                 |
|------------------------|----------------------------------------------------|-------------------------------------------------|
| Bond precision:        | C-C = 0.0084 Å                                     | Wavelength=0.71073                              |
| Cell:                  | a=23.9090(12)      b=13.5257(7)      c=20.3311(10) |                                                 |
|                        | alpha=90      beta=111.916(1)      gamma=90        |                                                 |
| Temperature:           | 297 K                                              |                                                 |
|                        | Calculated                                         | Reported                                        |
| Volume                 | 6099.7(5)                                          | 6099.6(5)                                       |
| Space group            | P 21/c                                             | P 21/c                                          |
| Hall group             | -P 2ybc                                            | ?                                               |
| Moiety formula         | C32 H16 Cl F4 Ir N4 O2,<br>0.85(O)                 | 4(C32 H16 Cl F4 Ir N4 O2),<br>1.2(O), 1.2(O), O |
| Sum formula            | C32 H16 Cl F4 Ir N4 O2.85                          | Cl28 H70.80 Cl4 F16 Ir4<br>N16 O11.40           |
| Mr                     | 805.76                                             | 3229.81                                         |
| Dx, g cm <sup>-3</sup> | 1.755                                              | 1.759                                           |
| Z                      | 8                                                  | 2                                               |
| Mu (mm <sup>-1</sup> ) | 4.529                                              | 4.529                                           |
| F000                   | 3110.4                                             | 3124.0                                          |
| F000'                  | 3101.77                                            |                                                 |
| h,k,lmax               | 29,16,25                                           | 29,16,25                                        |
| Nref                   | 12023                                              | 11970                                           |
| Tmin,Tmax              | 0.131,0.386                                        | 0.487,1.000                                     |
| Tmin'                  | 0.099                                              |                                                 |

Correction method= # Reported T Limits: Tmin=0.487 Tmax=1.000  
AbsCorr = EMPIRICAL

Data completeness= 0.996      Theta(max)= 26.030

R(reflections)= 0.0319( 9598)      wR2(reflections)= 0.0899( 11970)

S = 1.070      Npar= 829

---

The following ALERTS were generated. Each ALERT has the format

**test-name\_ALERT\_alert-type\_alert-level.**

Click on the hyperlinks for more details of the test.

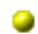

### Alert level C

ABSTY02\_ALERT\_1\_C An \_exptl\_absorpt\_correction\_type has been given without a literature citation. This should be contained in the \_exptl\_absorpt\_process\_details field.

Absorption correction given as empirical

|                   |                                       |                                    |              |
|-------------------|---------------------------------------|------------------------------------|--------------|
| PLAT041_ALERT_1_C | Calc. and Reported SumFormula         | Strings Differ                     | Please Check |
| PLAT043_ALERT_1_C | Calculated and Reported Mol. Weight   | Differ by ..                       | 1.69 Check   |
| PLAT068_ALERT_1_C | Reported F000                         | Differs from Calcd (or Missing)... | Please Check |
| PLAT213_ALERT_2_C | Atom F5                               | has ADP max/min Ratio .....        | 3.3 prolat   |
| PLAT213_ALERT_2_C | Atom N8'                              | has ADP max/min Ratio .....        | 3.6 prolat   |
| PLAT214_ALERT_2_C | Atom O5                               | (Anion/Solvent) ADP max/min Ratio  | 4.4 prolat   |
| PLAT220_ALERT_2_C | Non-Solvent Resd 1                    | N Ueq(max)/Ueq(min) Range          | 4.1 Ratio    |
| PLAT242_ALERT_2_C | Low 'MainMol' Ueq                     | as Compared to Neighbors of        | C61 Check    |
| PLAT242_ALERT_2_C | Low 'MainMol' Ueq                     | as Compared to Neighbors of        | C64 Check    |
| PLAT242_ALERT_2_C | Low 'MainMol' Ueq                     | as Compared to Neighbors of        | C29 Check    |
| PLAT334_ALERT_2_C | Small Average Benzene                 | C-C Dist. C33 -C38                 | 1.37 Ang.    |
| PLAT342_ALERT_3_C | Low Bond Precision on                 | C-C Bonds .....                    | 0.00844 Ang. |
| PLAT601_ALERT_2_C | Structure Contains Solvent Accessible | VOIDS of .                         | 36 Ang3      |

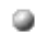

### Alert level G

FORMU01\_ALERT\_1\_G There is a discrepancy between the atom counts in the \_chemical\_formula\_sum and \_chemical\_formula\_moiety. This is usually due to the moiety formula being in the wrong format.

Atom count from \_chemical\_formula\_sum: C128 H70.8 Cl4 F16 Ir4 N16

Atom count from \_chemical\_formula\_moiety: C128 H64 Cl4 F16 Ir4 N16 O1

FORMU01\_ALERT\_2\_G There is a discrepancy between the atom counts in the \_chemical\_formula\_sum and the formula from the \_atom\_site\* data.

Atom count from \_chemical\_formula\_sum: C128 H70.8 Cl4 F16 Ir4 N16 O11

Atom count from the \_atom\_site data: C128 H64 Cl4 F16 Ir4 N16 O11.4

CELLZ01\_ALERT\_1\_G Difference between formula and atom\_site contents detected.

CELLZ01\_ALERT\_1\_G WARNING: H atoms missing from atom site list. Is this intentional?

From the CIF: \_cell\_formula\_units\_Z 2

From the CIF: \_chemical\_formula\_sum C128 H70.80 Cl4 F16 Ir4 N16 O11.

TEST: Compare cell contents of formula and atom\_site data

| atom | Z*formula | cif sites | diff  |
|------|-----------|-----------|-------|
| C    | 256.00    | 256.00    | 0.00  |
| H    | 141.60    | 128.00    | 13.60 |
| Cl   | 8.00      | 8.00      | 0.00  |
| F    | 32.00     | 32.00     | 0.00  |
| Ir   | 8.00      | 8.00      | 0.00  |
| N    | 32.00     | 32.00     | 0.00  |
| O    | 22.80     | 22.80     | 0.00  |

HYDTR01\_ALERT\_1\_G Extra text has been found in the \_refine\_ls\_hydrogen\_treatment field. Explanatory text should be in the \_publ\_section\_refinement field.

Hydrogen treatment given as constr

Hydrogen treatment identified as constr

|                   |                                      |                        |              |
|-------------------|--------------------------------------|------------------------|--------------|
| PLAT005_ALERT_5_G | No Embedded Refinement Details found | in the CIF             | Please Do !  |
| PLAT042_ALERT_1_G | Calc. and Reported MoietyFormula     | Strings Differ         | Please Check |
| PLAT045_ALERT_1_G | Calculated and Reported Z            | Differ by a Factor ... | 4.00 Check   |
| PLAT300_ALERT_4_G | Atom Site Occupancy of >N8           | is Constrained at      | 0.7 Check    |
| PLAT300_ALERT_4_G | Atom Site Occupancy of <N8'          | is Constrained at      | 0.3 Check    |
| PLAT300_ALERT_4_G | Atom Site Occupancy of >O5           | is Constrained at      | 0.6 Check    |
| PLAT300_ALERT_4_G | Atom Site Occupancy of >O6           | is Constrained at      | 0.6 Check    |
| PLAT300_ALERT_4_G | Atom Site Occupancy of *O7           | is Constrained at      | 0.5 Check    |

|                                                                    |              |      |       |
|--------------------------------------------------------------------|--------------|------|-------|
| PLAT301_ALERT_3_G Main Residue Disorder .....                      | Percentage = | 1    | Note  |
| PLAT302_ALERT_4_G Anion/Solvent Disorder .....                     | Percentage = | 100  | Note  |
| PLAT304_ALERT_4_G Non-Integer Number of Atoms ( 0.60) in Resd. #   |              | 3    | Check |
| PLAT304_ALERT_4_G Non-Integer Number of Atoms ( 0.60) in Resd. #   |              | 4    | Check |
| PLAT304_ALERT_4_G Non-Integer Number of Atoms ( 0.50) in Resd. #   |              | 5    | Check |
| PLAT311_ALERT_2_G Isolated Disordered Oxygen Atom (No H's ?) ..... |              | 05   | Check |
| PLAT311_ALERT_2_G Isolated Disordered Oxygen Atom (No H's ?) ..... |              | 06   | Check |
| PLAT311_ALERT_2_G Isolated Disordered Oxygen Atom (No H's ?) ..... |              | 07   | Check |
| PLAT779_ALERT_4_G Suspect or Irrelevant (Bond) Angle in CIF .... # |              | 242  | Check |
| N8' -C64 -N8 1.555 1.555 1.555                                     | 27.00 Deg.   |      |       |
| PLAT790_ALERT_4_G Centre of Gravity not Within Unit Cell: Resd. #  |              | 3    | Note  |
| O                                                                  |              |      |       |
| PLAT790_ALERT_4_G Centre of Gravity not Within Unit Cell: Resd. #  |              | 5    | Note  |
| O                                                                  |              |      |       |
| PLAT899_ALERT_4_G SHELXL97 is Deprecated and Succeeded by SHELXL   |              | 2014 | Note  |

---

0 **ALERT level A** = Most likely a serious problem - resolve or explain  
0 **ALERT level B** = A potentially serious problem, consider carefully  
14 **ALERT level C** = Check. Ensure it is not caused by an omission or oversight  
25 **ALERT level G** = General information/check it is not something unexpected

10 ALERT type 1 CIF construction/syntax error, inconsistent or missing data  
13 ALERT type 2 Indicator that the structure model may be wrong or deficient  
2 ALERT type 3 Indicator that the structure quality may be low  
13 ALERT type 4 Improvement, methodology, query or suggestion  
1 ALERT type 5 Informative message, check

---

It is advisable to attempt to resolve as many as possible of the alerts in all categories. Often the minor alerts point to easily fixed oversights, errors and omissions in your CIF or refinement strategy, so attention to these fine details can be worthwhile. In order to resolve some of the more serious problems it may be necessary to carry out additional measurements or structure refinements. However, the purpose of your study may justify the reported deviations and the more serious of these should normally be commented upon in the discussion or experimental section of a paper or in the "special\_details" fields of the CIF. checkCIF was carefully designed to identify outliers and unusual parameters, but every test has its limitations and alerts that are not important in a particular case may appear. Conversely, the absence of alerts does not guarantee there are no aspects of the results needing attention. It is up to the individual to critically assess their own results and, if necessary, seek expert advice.

### Publication of your CIF in IUCr journals

A basic structural check has been run on your CIF. These basic checks will be run on all CIFs submitted for publication in IUCr journals (*Acta Crystallographica*, *Journal of Applied Crystallography*, *Journal of Synchrotron Radiation*); however, if you intend to submit to *Acta Crystallographica Section C* or *E* or *IUCrData*, you should make sure that full publication checks are run on the final version of your CIF prior to submission.

### Publication of your CIF in other journals

Please refer to the *Notes for Authors* of the relevant journal for any special instructions relating to CIF submission.

PLATON version of 11/08/2016; check.def file version of 04/08/2016

Datablock fpycnm - ellipsoid plot

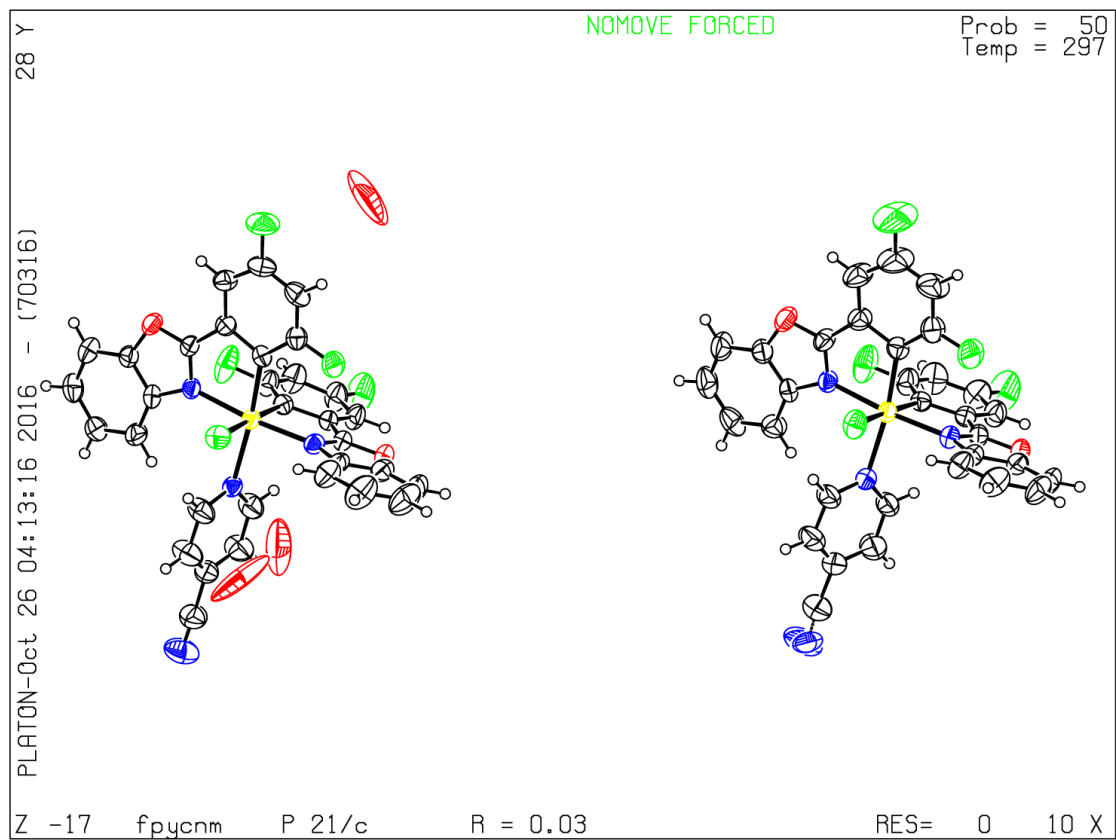

Supplement: s1 [file s1]
