# Supplementary material
Source: MDPI journal article supplement (https://www.mdpi.com/2304-6740/6/4/118)
Supplement: s1 [file s1]

# Supplementary Materials: Cyclometalated Iridium(III) Complexes Containing Benzoxazole Derivatives and Different Ancillary Ligands for Catalytic Oxidation of Toluene

Kelvin H.-C. Chen, Pei-Chun Liu, Tsun-Ren Chen and Jhy-Der Chen

Table S1. Crystal data of complexes 1 and 2.

|                                                     | 1                           | 2                           |
|-----------------------------------------------------|-----------------------------|-----------------------------|
| empirical formula                                   | C31 H21 Cl Ir N3 O2         | C32 H23 Cl Ir N3 O2         |
| fw                                                  | 695.16                      | 709.18                      |
| temp [K]                                            | 110(2)                      | 110(2)                      |
| cryst size [mm <sup>3</sup> ]                       | 0.76 x 0.58 x 0.38          | 0.70 x 0.56 x 0.46          |
| cryst syst                                          | Monoclinic                  | Triclinic                   |
| space group                                         | P 21/c                      | P -1                        |
| a [Å]                                               | 9.6077(2)                   | 12.2515(4)                  |
| b [Å]                                               | 17.1133(3)                  | 13.7904(4)                  |
| c [Å]                                               | 16.5835(3)                  | 17.8219(5)                  |
| α [deg]                                             | 90                          | 73.583(3)                   |
| β [deg]                                             | 99.796(2)                   | 78.557(2)                   |
| γ [deg]                                             | 90                          | 71.135(3)                   |
| V [Å <sup>3</sup> ], Z                              | 2686.89(9), 4               | 2714.09(14), 4              |
| ρ <sub>calcd</sub> [g.cm <sup>-3</sup> ]            | 1.718                       | 1.736                       |
| μ [mm <sup>-1</sup> ]                               | 5.102                       | 5.053                       |
| F(000)                                              | 1352                        | 1384                        |
| Scan mode                                           | ω                           | ω                           |
| detector                                            | Bruker-CCD                  | Bruker-CCD                  |
| θ <sub>max</sub> [deg]                              | 29.20                       | 29.23                       |
| no. of total refins                                 | 13167                       | 24208                       |
| no. of unique refins                                | 6220                        | 12516                       |
| R(int)                                              | 0.0276                      | 0.0229                      |
| no. of params                                       | 343                         | 697                         |
| GOF on F <sup>2</sup>                               | 0.977                       | 1.018                       |
| R indices [ <i>I</i> > σ <sup>2</sup> ( <i>I</i> )] | R1 = 0.0256<br>wR2 = 0.0595 | R1 = 0.0239<br>wR2 = 0.0462 |
| R indices (all data)                                | wR2 = 0.0360<br>R1 = 0.0609 | wR2 = 0.0365<br>R1 = 0.0476 |
| max diff. peak, hole (e.Å <sup>-3</sup> )           | 1.296, -0.974               | 1.216, -0.987               |

**Table S2.** Crystal data of complexes 4–6.

|                                           | 4                                                                                | 5                                                                                | 6                                                                                |
|-------------------------------------------|----------------------------------------------------------------------------------|----------------------------------------------------------------------------------|----------------------------------------------------------------------------------|
| empirical formula                         | C <sub>31</sub> H <sub>17</sub> ClF <sub>4</sub> IrN <sub>3</sub> O <sub>2</sub> | C <sub>32</sub> H <sub>19</sub> ClF <sub>4</sub> IrN <sub>3</sub> O <sub>2</sub> | C <sub>32</sub> H <sub>16</sub> ClF <sub>4</sub> IrN <sub>4</sub> O <sub>2</sub> |
| fw                                        | 767.14                                                                           | 781.15                                                                           | 792.14                                                                           |
| temp [K]                                  | 110(2) K                                                                         | 110(2) K                                                                         | 297(2)                                                                           |
| cryst size [mm <sup>3</sup> ]             | 0.58 x 0.42 x 0.28                                                               | 0.72 x 0.38 x 0.28                                                               | 0.48 x 0.40 x 0.21                                                               |
| cryst syst                                | Monoclinic                                                                       | Monoclinic                                                                       | Monoclinic                                                                       |
| space group                               | P 21/n                                                                           | P 21/c                                                                           | P 21/c                                                                           |
| a [Å]                                     | 9.7170(2)                                                                        | 12.1130(2)                                                                       | 23.9090(12)                                                                      |
| b [Å]                                     | 17.9672(4)                                                                       | 16.4385(3)                                                                       | 13.5257(7)                                                                       |
| c [Å]                                     | 6.2161(3)                                                                        | 13.9655(2)                                                                       | 20.3311(10)                                                                      |
| α [deg]                                   | 90                                                                               | 90                                                                               | 90                                                                               |
| β [deg]                                   | 94.710(2)                                                                        | 103.533(2)                                                                       | 111.9160(10)                                                                     |
| γ [deg]                                   | 90                                                                               | 90                                                                               | 90                                                                               |
| V [Å <sup>3</sup> ], Z                    | 2821.56(10), 2                                                                   | 2703.60(8), 4                                                                    | 6099.6(5), 2                                                                     |
| ρ <sub>calcd</sub> [g.cm <sup>-3</sup> ]  | 1.906                                                                            | 1.919                                                                            | 1.759                                                                            |
| μ [mm <sup>-1</sup> ]                     | 4.984                                                                            | 5.102                                                                            | 4.529                                                                            |
| F(000)                                    | 1564                                                                             | 1512                                                                             | 3124                                                                             |
| Scan mode                                 | ω                                                                                | ω                                                                                | ω                                                                                |
| detector                                  | Bruker-CCD                                                                       | Bruker-CCD                                                                       | Bruker-CCD                                                                       |
| θ <sub>max</sub> [deg]                    | 29.22                                                                            | 29.26                                                                            | 26.03                                                                            |
| no. of total refins                       | 13859                                                                            | 25755                                                                            | 33780                                                                            |
| no. of unique refins                      | 6574                                                                             | 6538                                                                             | 11970                                                                            |
| R(int)                                    | 0.0261                                                                           | 0.0299                                                                           | 0.0326                                                                           |
| no. of params                             | 412                                                                              | 388                                                                              | 829                                                                              |
| GOF on F <sup>2</sup>                     | 0.953                                                                            | 0.996                                                                            | 1.070                                                                            |
| R indices [ <i>I</i> > σ2( <i>I</i> )]    | R1 = 0.0254                                                                      | R1 = 0.0194                                                                      | R1 = 0.0319                                                                      |
|                                           | wR2 = 0.0505                                                                     | wR2 = 0.0399                                                                     | wR2 = 0.0847                                                                     |
| R indices (all data)                      | R1 = 0.0368                                                                      | R1 = 0.0295                                                                      | R1 = 0.0444                                                                      |
|                                           | wR2 = 0.0519                                                                     | wR2 = 0.0408                                                                     | wR2 = 0.0899                                                                     |
| max diff. peak, hole (e.Å <sup>-3</sup> ) | 1.719, -1.023                                                                    | 0.824, -0.824                                                                    | 1.448, -1.301                                                                    |

**Table S3.** Crystal data of complexes **8** and **9**.

|                                                     | <b>8</b>                                                                         | <b>9</b>                                                                         |
|-----------------------------------------------------|----------------------------------------------------------------------------------|----------------------------------------------------------------------------------|
| empirical formula                                   | C <sub>32</sub> H <sub>19</sub> N <sub>3</sub> O <sub>2</sub> IF <sub>4</sub> Ir | C <sub>32</sub> H <sub>16</sub> N <sub>4</sub> O <sub>2</sub> IF <sub>4</sub> Ir |
| fw                                                  | 873.01                                                                           | 883.61                                                                           |
| temp [K]                                            | 110(2) K                                                                         | 110(2) K                                                                         |
| cryst size [mm <sup>3</sup> ]                       | 0.75 x 0.60 x 0.40                                                               | 0.76 x 0.60 x 0.36                                                               |
| cryst syst                                          | Triclinic                                                                        | Triclinic                                                                        |
| space group                                         | P -1                                                                             | P -1                                                                             |
| a [Å]                                               | 8.5721(2)                                                                        | 11.8797(4)                                                                       |
| b [Å]                                               | 10.9433(3)                                                                       | 12.1298(4)                                                                       |
| c [Å]                                               | 16.9964(6)                                                                       | 12.8946(4)                                                                       |
| α [deg]                                             | 95.019(2)                                                                        | 88.936(2)                                                                        |
| β [deg]                                             | 97.165(2)                                                                        | 86.581(2)                                                                        |
| γ [deg]                                             | 91.412(2)                                                                        | 68.125(3)                                                                        |
| V [Å <sup>3</sup> ], Z                              | 1574.85(8), 2                                                                    | 1721.22(10), 2                                                                   |
| ρ <sub>calcd</sub> [g.cm <sup>-3</sup> ]            | 1.931                                                                            | 2.033                                                                            |
| μ [mm <sup>-1</sup> ]                               | 5.280                                                                            | 5.147                                                                            |
| F(000)                                              | 878                                                                              | 1004                                                                             |
| Scan mode                                           | ω                                                                                | ω                                                                                |
| detector                                            | Bruker-CCD                                                                       | Bruker-CCD                                                                       |
| θ <sub>max</sub> [deg]                              | 29.20                                                                            | 29.25                                                                            |
| no. of total refins                                 | 14010                                                                            | 15110                                                                            |
| no. of unique refins                                | 7249                                                                             | 7983                                                                             |
| R(int)                                              | 0.0229                                                                           | 0.0210                                                                           |
| no. of params                                       | 409                                                                              | 463                                                                              |
| GOF on F <sup>2</sup>                               | 1.030                                                                            | 1.012                                                                            |
| R indices [ <i>I</i> > σ <sup>2</sup> ( <i>I</i> )] | R1 = 0.0317<br>wR2 = 0.0703                                                      | R1 = 0.0236<br>wR2 = 0.0549                                                      |
| R indices (all data)                                | R1 = 0.0401<br>wR2 = 0.0723                                                      | R1 = 0.0286<br>wR2 = 0.0558                                                      |
| max diff. peak, hole (e.Å <sup>-3</sup> )           | 1.809, -2.395                                                                    | 1.530, -1.268                                                                    |



**Table S6.** Reaction rates, catalytic frequencies, concentration of the product and turnover number of catalytic oxidation of toluene with various concentrations of complexes as catalysts.

| para.<br>Cat.<br>(mM) | rate <sup>a</sup> | TOF <sup>b</sup> | CP <sub>6</sub> <sup>c</sup> | TON <sub>6</sub> <sup>d</sup> | selectivity<br>(%) <sup>e</sup> |
|-----------------------|-------------------|------------------|------------------------------|-------------------------------|---------------------------------|
| 1                     | 1                 | 4.72             | 17                           | 102                           | 89                              |
|                       | 0.1               | 7.50             | 270                          | 162                           | 90                              |
|                       | 0.01              | 4.72             | 1700                         | 10200                         | 89                              |
|                       | 0.001             | 1.09             | 3900                         | 23400                         | 86                              |
| 2                     | 1                 | 4.46             | 16                           | 96                            | 89                              |
|                       | 0.1               | 7.28             | 262                          | 157                           | 90                              |
|                       | 0.01              | 4.00             | 1440                         | 86                            | 8620                            |
|                       | 0.001             | 0.97             | 3480                         | 21                            | 20900                           |
| 3                     | 1                 | 4.41             | 16                           | 95                            | 96                              |
|                       | 0.1               | 6.77             | 244                          | 146                           | 1460                            |
|                       | 0.01              | 3.88             | 1400                         | 84                            | 8380                            |
|                       | 0.001             | 0.84             | 3050                         | 18                            | 18400                           |
| 4                     | 1                 | 19.0             | 68                           | 411                           | 410                             |
|                       | 0.1               | 19.4             | 698                          | 419                           | 4180                            |
|                       | 0.01              | 12.0             | 4300                         | 258                           | 25800                           |
|                       | 0.001             | 2.81             | 10100                        | 61                            | 60700                           |
| 5                     | 1                 | 20.3             | 73                           | 438                           | 437                             |
|                       | 0.1               | 15.4             | 553                          | 332                           | 3320                            |
|                       | 0.01              | 11.6             | 4180                         | 251                           | 25000                           |
|                       | 0.001             | 2.75             | 9940                         | 60                            | 59600                           |
| 6                     | 1                 | 15.0             | 54                           | 323                           | 323                             |
|                       | 0.1               | 13.0             | 468                          | 281                           | 2810                            |
|                       | 0.01              | 9.00             | 3240                         | 194                           | 19400                           |
|                       | 0.001             | 2.75             | 9900                         | 59                            | 59500                           |
| 7                     | 1                 | 6.08             | 22                           | 131                           | 131                             |
|                       | 0.1               | 9.67             | 349                          | 209                           | 2090                            |
|                       | 0.01              | 4.99             | 1800                         | 108                           | 10800                           |
|                       | 0.001             | 1.35             | 4880                         | 29                            | 29200                           |
| 8                     | 1                 | 5.76             | 21                           | 124                           | 124                             |
|                       | 0.1               | 8.56             | 308                          | 185                           | 1850                            |
|                       | 0.01              | 4.94             | 1780                         | 107                           | 10700                           |
|                       | 0.001             | 1.27             | 4570                         | 27                            | 27500                           |
| 9                     | 1                 | 5.62             | 20                           | 121                           | 121                             |
|                       | 0.1               | 8.46             | 304                          | 183                           | 1830                            |
|                       | 0.01              | 4.50             | 1620                         | 97                            | 9750                            |
|                       | 0.001             | 1.05             | 3780                         | 23                            | 22600                           |

<sup>a</sup> catalytic rate of complexes for the catalytic oxidation of toluene ( $\mu\text{M s}$ ); <sup>b</sup> catalytic frequencies of the complexes ( $\text{h}^{-1}$ ); <sup>c</sup> the concentration of the product after 6 hours of reaction time (mM); <sup>d</sup> the turnover number after 6 hours of reaction time. <sup>e</sup> the chemoselectivity to benzaldehyde

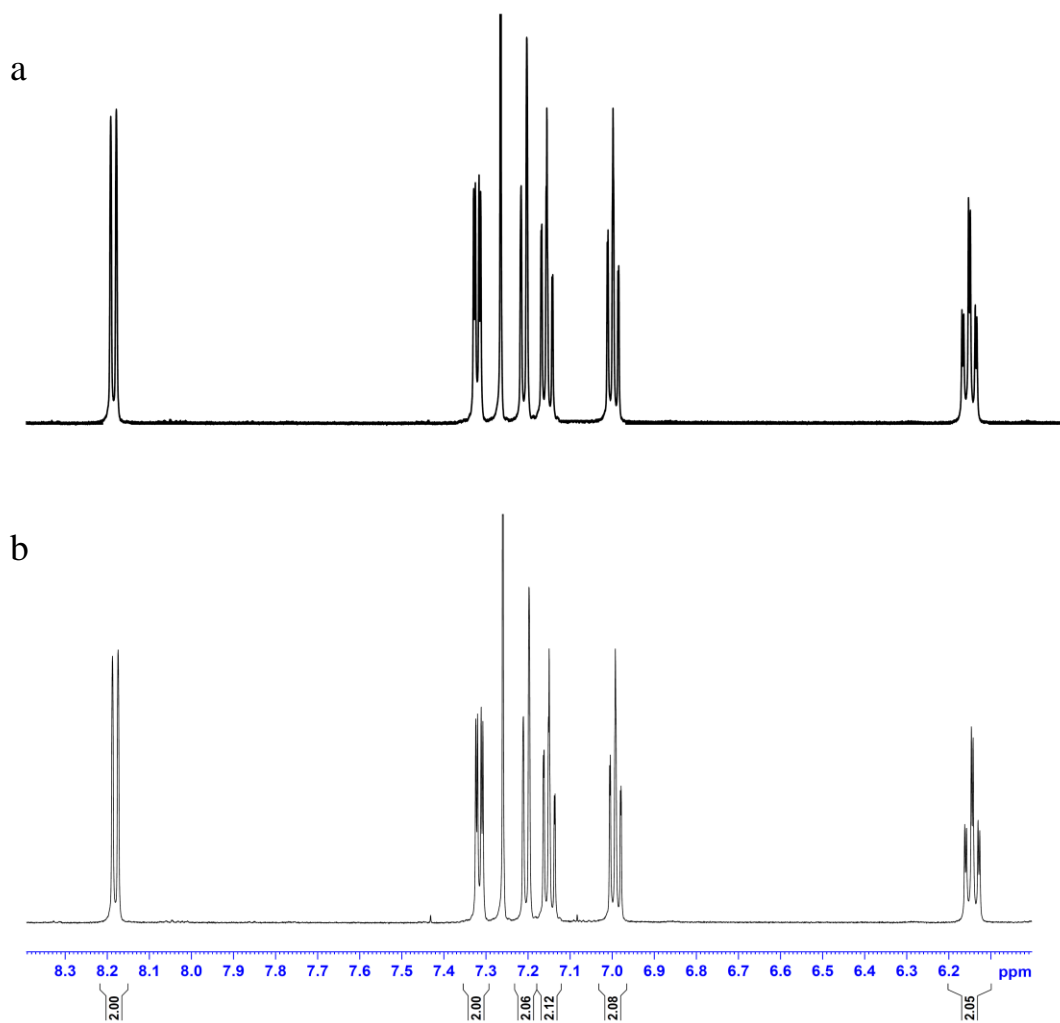

**Figure S1.** (a) NMR spectrum of precipitate formed from solution when a higher concentration of complex **4** was used, and (b) NMR spectrum of **D2**.

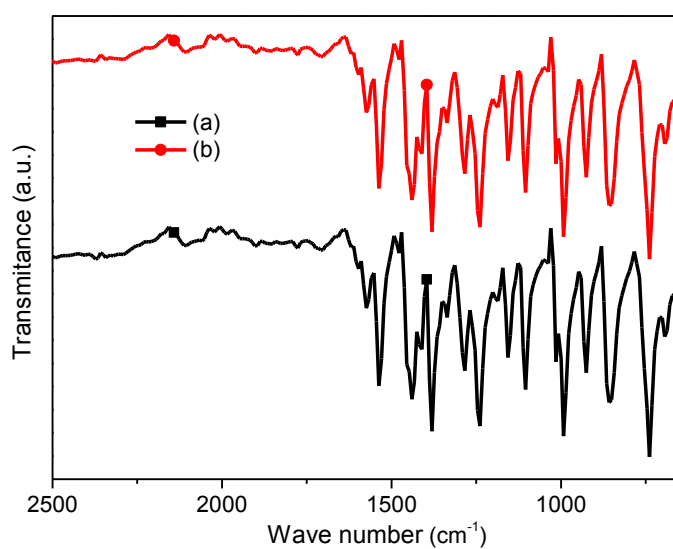

**Figure S2.** (a) IR spectrum of precipitate formed from solution when a higher concentration of complex **4** was used, and (b) IR spectrum of **D2**.

a

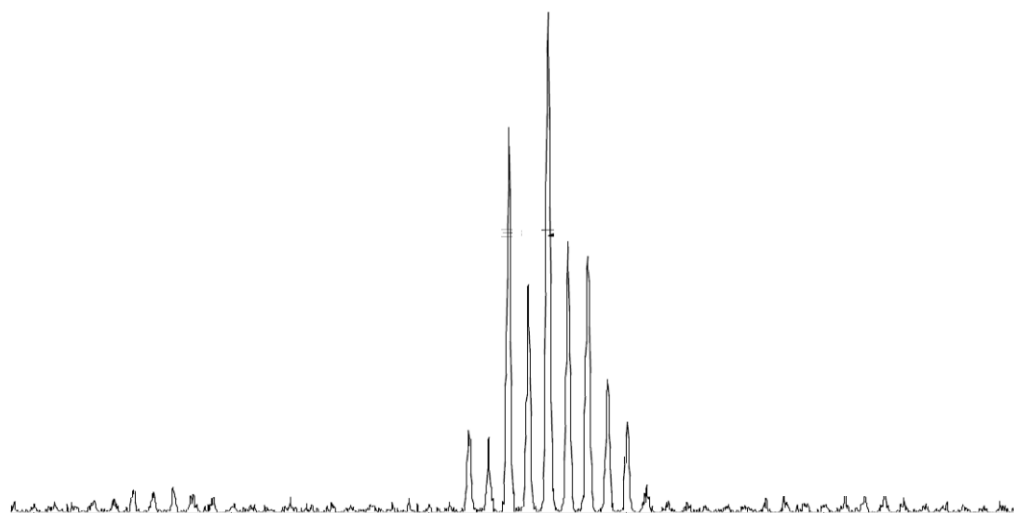

b

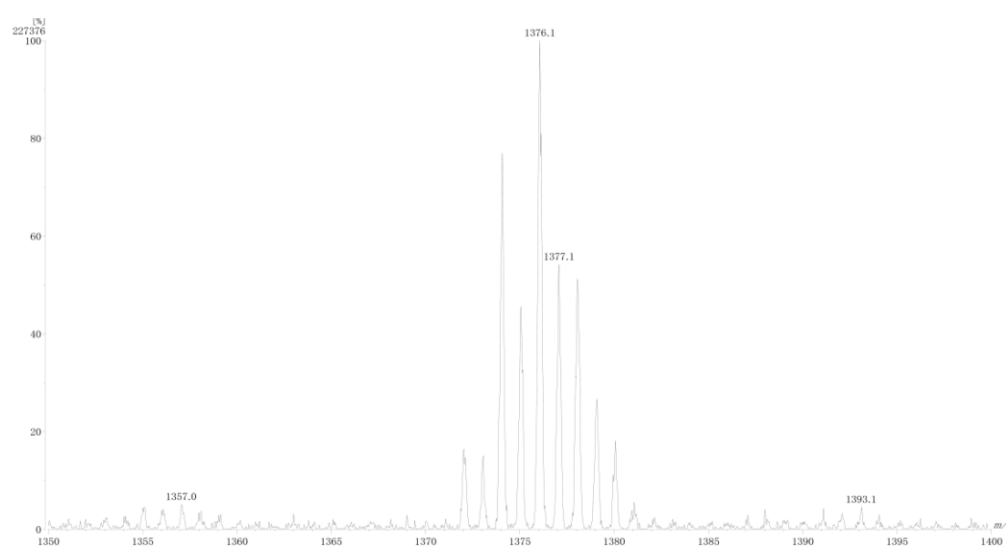

**Figure S3.** (a) MS spectrum of precipitate formed from solution when a higher concentration of complex **4** was used, and (b) MS spectrum of **D2**.

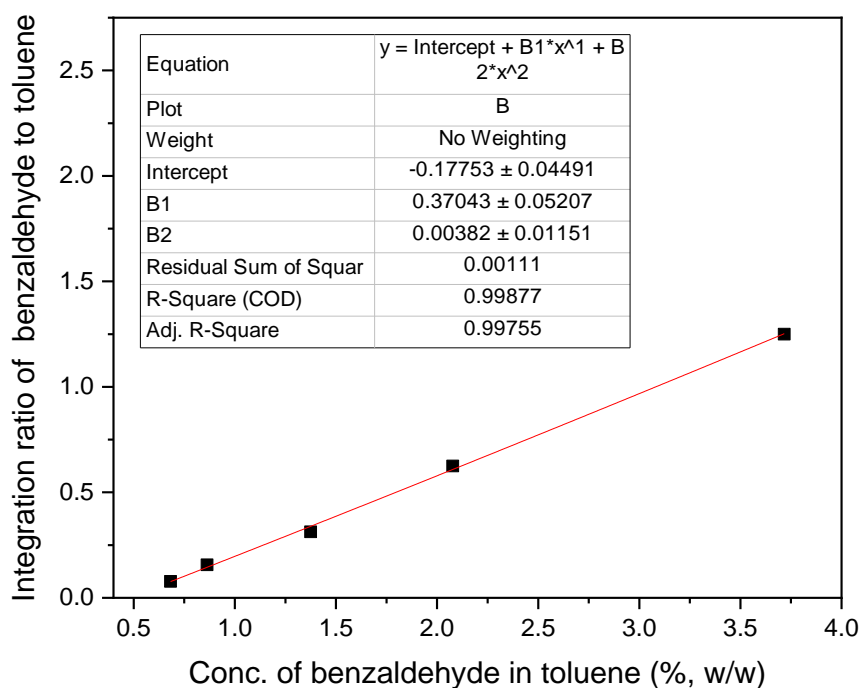

**Figure S4.** The calibration curve of the standard solutions containing toluene and benzaldehyde.

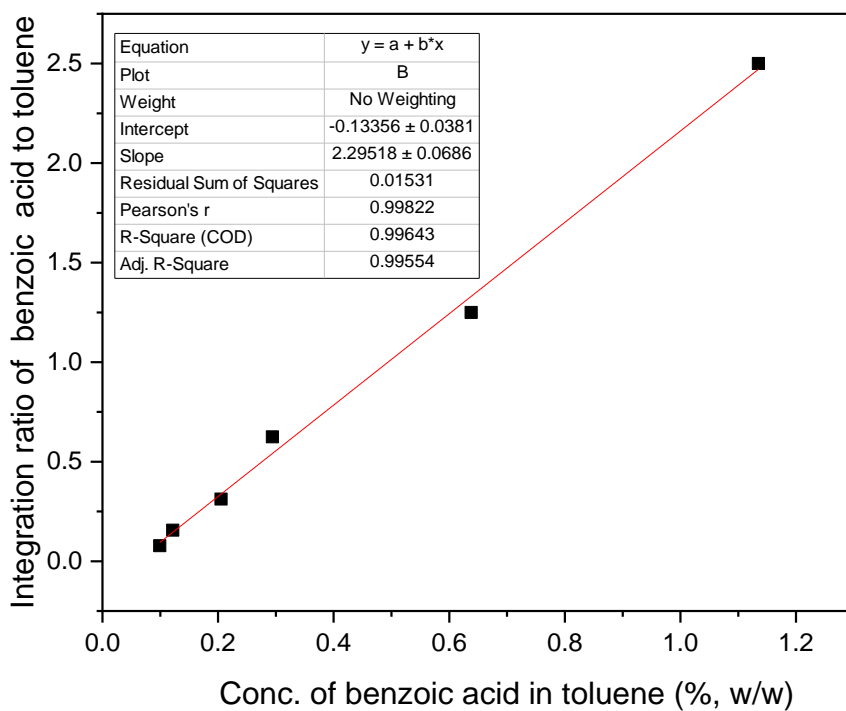

**Figure S5.** The calibration curve of the standard solutions containing toluene and benzoic acid.



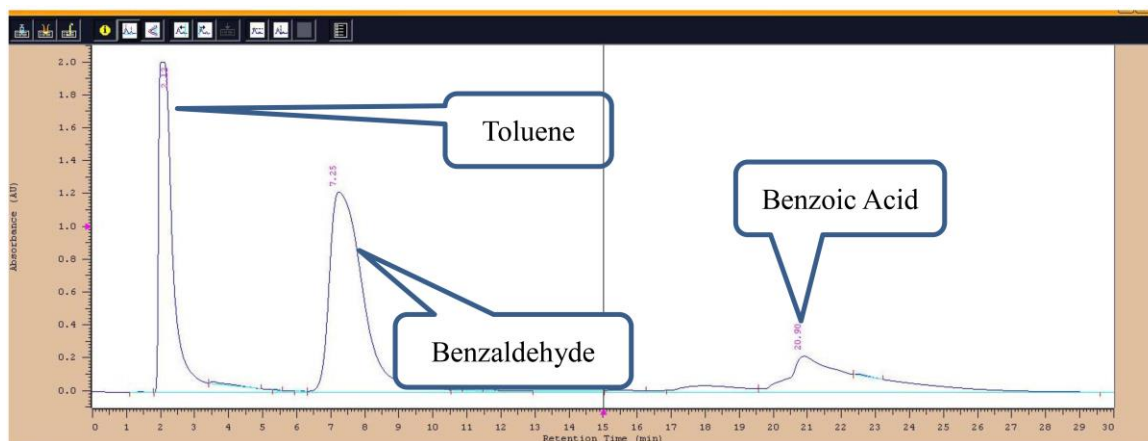

**Figure S6.** A picture of HPLC containing toluene, benzaldehyde, and benzoic acid, the integration ratio of benzaldehyde to toluene is 1.44 (0.38 % of benzaldehyde in toluene), the integration ratio of benzoic acid to toluene is 0.12 (0.16 % of benzaldehyde in toluene).
