# Supplementary material
Source: MDPI journal article supplement (https://www.mdpi.com/2304-6740/6/4/118)
Supplement: s1 [file s1]

Archive with 16 entries (15 files):
- inorganics-371116-supplementary/
- inorganics-371116-supplementary/1. checkcif.pdf
- inorganics-371116-supplementary/1. pbopy2.cif
- inorganics-371116-supplementary/2. checkcif.pdf
- inorganics-371116-supplementary/2. pbompy.cif
- inorganics-371116-supplementary/4. checkcif.pdf
- inorganics-371116-supplementary/4. pya.cif
- inorganics-371116-supplementary/5. checkcif.pdf
- inorganics-371116-supplementary/5. fp4mpy.cif
- inorganics-371116-supplementary/6. checkcif.pdf
- inorganics-371116-supplementary/6. FPYCNM.CIF
- inorganics-371116-supplementary/8. 4m.cif
- inorganics-371116-supplementary/8. checkcif.pdf
- inorganics-371116-supplementary/9. 4cn.cif
- inorganics-371116-supplementary/9. checkcif.pdf
- inorganics-371116-supplementary/inorganics-371116-supplementary.pdf
