# Supplementary material
Source: MDPI journal article supplement (https://www.mdpi.com/2304-6740/6/4/118)
Supplement: s1 [file s1 › inorganics-371116-supplementary/1. pbopy2.cif]

 
data_pbopy2 
  
_audit_creation_method           SHELXL-97 
_chemical_name_systematic        ? 
_chemical_name_common            ? 
_chemical_formula_moiety         'C31 H21 Cl Ir N3 O2' 
_chemical_formula_sum            'C31 H21 Cl Ir N3 O2' 
_chemical_melting_point          ? 
  
_exptl_crystal_description       parallelepiped 
_exptl_crystal_colour            yellow 
  
_diffrn_ambient_temperature      110(2) 
_chemical_formula_weight         695.16 
  
loop_ 
_atom_type_symbol 
_atom_type_description 
_atom_type_scat_dispersion_real 
_atom_type_scat_dispersion_imag 
_atom_type_scat_source 
C C 0.0033 0.0016 'International Tables Vol C Tables 4.2.6.8 and 6.1.1.4' 
H H 0.0000 0.0000 'International Tables Vol C Tables 4.2.6.8 and 6.1.1.4' 
N N 0.0061 0.0033 'International Tables Vol C Tables 4.2.6.8 and 6.1.1.4' 
O O 0.0106 0.0060 'International Tables Vol C Tables 4.2.6.8 and 6.1.1.4' 
Cl Cl 0.1484 0.1585 'International Tables Vol C Tables 4.2.6.8 and 6.1.1.4' 
Ir Ir -1.4442 7.9887 'International Tables Vol C Tables 4.2.6.8 and 6.1.1.4' 
  
_symmetry_cell_setting           monoclinic 
_symmetry_space_group_name_H-M   'P 21/c' 
_symmetry_int_tables_number      14 
_chemical_absolute_configuration ? 
  
loop_ 
_symmetry_equiv_pos_as_xyz 
'x, y, z' 
'-x, y+1/2, -z+1/2' 
'-x, -y, -z' 
'x, -y-1/2, z-1/2' 
  
_cell_length_a                   9.6077(2) 
_cell_length_b                   17.1133(3) 
_cell_length_c                   16.5835(3) 
_cell_angle_alpha                90.00 
_cell_angle_beta                 99.796(2) 
_cell_angle_gamma                90.00 
_cell_volume                     2686.89(9) 
_cell_formula_units_Z            4 
_cell_measurement_temperature    110(2) 
_cell_measurement_reflns_used    8283 
_cell_measurement_theta_min      2.9117 
_cell_measurement_theta_max      29.1345 
_exptl_crystal_size_max          0.76 
_exptl_crystal_size_mid          0.58 
_exptl_crystal_size_min          0.38 
_exptl_crystal_density_meas      ? 
_exptl_crystal_density_diffrn    1.718 
_exptl_crystal_density_method    'not measured' 
_exptl_crystal_F_000             1352 
_exptl_absorpt_coefficient_mu    5.102 
_exptl_absorpt_correction_type   multi-scan 
_exptl_absorpt_correction_T_min  0.49205 
_exptl_absorpt_correction_T_max  1.00000 
_exptl_absorpt_process_details 
; 
CrysAlisPro, Oxford Diffraction Ltd., 
Version 1.171.33.66 (release 28-04-2010 CrysAlis171 .NET) 
(compiled Apr 28 2010,14:27:37) 
Empirical absorption correction using spherical harmonics, 
 implemented in SCALE3 ABSPACK scaling algorithm. 
; 
  
_exptl_special_details 
; 
 ? 
; 
_diffrn_radiation_probe          x-ray 
_diffrn_radiation_type           MoK\a 
_diffrn_radiation_wavelength     0.71073 
_diffrn_source                   'fine-focus sealed tube' 
_diffrn_radiation_monochromator  graphite 
_diffrn_measurement_device_type  'CCD detector' 
_diffrn_measurement_method       '\w scans' 
_diffrn_detector_area_resol_mean ? 
_diffrn_reflns_number            13167 
_diffrn_reflns_av_R_equivalents  0.0276 
_diffrn_reflns_av_sigmaI/netI    0.0470 
_diffrn_reflns_limit_h_min       -10 
_diffrn_reflns_limit_h_max       12 
_diffrn_reflns_limit_k_min       -21 
_diffrn_reflns_limit_k_max       21 
_diffrn_reflns_limit_l_min       -22 
_diffrn_reflns_limit_l_max       21 
_diffrn_reflns_theta_min         2.92 
_diffrn_reflns_theta_max         29.20 
_reflns_number_total             6220 
_reflns_number_gt                4941 
_reflns_threshold_expression     >2sigma(I) 
  
_computing_data_collection 
; 
CrysAlis CCD, Oxford Diffraction Ltd., 
Version 1.171.32.29 (release 10-06-2008 CrysAlis171 .NET) 
(compiled Jun 10 2008,16:49:55) 
; 
_computing_cell_refinement 
; 
CrysAlis RED, Oxford Diffraction Ltd., 
Version 1.171.32.29 (release 10-06-2008 CrysAlis171 .NET) 
(compiled Jun 10 2008,16:49:55) 
; 
_computing_data_reduction 
; 
CrysAlis RED, Oxford Diffraction Ltd., 
Version 1.171.32.29 (release 10-06-2008 CrysAlis171 .NET) 
(compiled Jun 10 2008,16:49:55) 
; 
_computing_structure_solution    'SHELXS-97 (Sheldrick, 2008)' 
_computing_structure_refinement  'SHELXL-97 (Sheldrick, 2008)' 
_computing_molecular_graphics    'Bruker SHELXTL' 
_computing_publication_material  'Bruker SHELXTL' 
  
_refine_special_details 
; 
 Refinement of F^2^ against ALL reflections.  The weighted R-factor wR and 
 goodness of fit S are based on F^2^, conventional R-factors R are based 
 on F, with F set to zero for negative F^2^. The threshold expression of 
 F^2^ > 2sigma(F^2^) is used only for calculating R-factors(gt) etc. and is 
 not relevant to the choice of reflections for refinement.  R-factors based 
 on F^2^ are statistically about twice as large as those based on F, and R- 
 factors based on ALL data will be even larger. 
; 
  
_refine_ls_structure_factor_coef Fsqd 
_refine_ls_matrix_type           full 
_refine_ls_weighting_scheme      calc 
_refine_ls_weighting_details 
'calc w=1/[\s^2^(Fo^2^)+(0.0319P)^2^+0.0000P] where P=(Fo^2^+2Fc^2^)/3' 
_atom_sites_solution_primary     direct 
_atom_sites_solution_secondary   difmap 
_atom_sites_solution_hydrogens   geom 
_refine_ls_hydrogen_treatment    constr 
_refine_ls_extinction_method     none 
_refine_ls_extinction_coef       ? 
_refine_ls_number_reflns         6220 
_refine_ls_number_parameters     343 
_refine_ls_number_restraints     0 
_refine_ls_R_factor_all          0.0360 
_refine_ls_R_factor_gt           0.0256 
_refine_ls_wR_factor_ref         0.0609 
_refine_ls_wR_factor_gt          0.0595 
_refine_ls_goodness_of_fit_ref   0.977 
_refine_ls_restrained_S_all      0.977 
_refine_ls_shift/su_max          0.003 
_refine_ls_shift/su_mean         0.000 
  
loop_ 
_atom_site_label 
_atom_site_type_symbol 
_atom_site_fract_x 
_atom_site_fract_y 
_atom_site_fract_z 
_atom_site_U_iso_or_equiv 
_atom_site_adp_type 
_atom_site_occupancy 
_atom_site_symmetry_multiplicity 
_atom_site_calc_flag 
_atom_site_refinement_flags 
_atom_site_disorder_assembly 
_atom_site_disorder_group 
Ir Ir 0.722319(15) 0.948208(8) 0.223223(8) 0.00918(5) Uani 1 1 d . . . 
Cl Cl 0.64488(10) 0.87332(5) 0.32637(6) 0.0158(2) Uani 1 1 d . . . 
O1 O 0.7646(3) 1.00612(14) -0.01178(15) 0.0158(6) Uani 1 1 d . . . 
O2 O 1.1147(3) 0.98491(14) 0.37058(15) 0.0127(5) Uani 1 1 d . . . 
N1 N 0.7800(3) 1.00367(16) 0.12472(18) 0.0098(6) Uani 1 1 d . . . 
N2 N 0.8874(3) 0.99551(17) 0.31440(18) 0.0109(6) Uani 1 1 d . . . 
N3 N 0.5717(3) 1.03850(16) 0.23449(19) 0.0121(7) Uani 1 1 d . . . 
C1 C 0.8762(4) 1.0597(2) 0.1059(2) 0.0128(8) Uani 1 1 d . . . 
C2 C 0.9655(4) 1.1108(2) 0.1536(2) 0.0151(8) Uani 1 1 d . . . 
H2A H 0.9730 1.1119 0.2115 0.018 Uiso 1 1 calc R . . 
C3 C 1.0452(4) 1.1611(2) 0.1122(3) 0.0203(9) Uani 1 1 d . . . 
H3A H 1.1079 1.1975 0.1427 0.024 Uiso 1 1 calc R . . 
C4 C 1.0344(4) 1.1591(2) 0.0282(3) 0.0200(9) Uani 1 1 d . . . 
H4A H 1.0914 1.1934 0.0027 0.024 Uiso 1 1 calc R . . 
C5 C 0.9434(4) 1.1086(2) -0.0204(3) 0.0182(9) Uani 1 1 d . . . 
H5A H 0.9353 1.1075 -0.0783 0.022 Uiso 1 1 calc R . . 
C6 C 0.8655(4) 1.0603(2) 0.0212(2) 0.0135(8) Uani 1 1 d . . . 
C7 C 0.7175(4) 0.9747(2) 0.0548(2) 0.0124(8) Uani 1 1 d . . . 
C8 C 0.6111(4) 0.9166(2) 0.0521(2) 0.0149(8) Uani 1 1 d . . . 
C9 C 0.5347(4) 0.8839(2) -0.0191(3) 0.0199(9) Uani 1 1 d . . . 
H9A H 0.5539 0.8986 -0.0713 0.024 Uiso 1 1 calc R . . 
C10 C 0.4317(5) 0.8302(2) -0.0124(3) 0.0256(10) Uani 1 1 d . . . 
H10A H 0.3812 0.8055 -0.0598 0.031 Uiso 1 1 calc R . . 
C11 C 0.4018(5) 0.8122(2) 0.0652(3) 0.0236(10) Uani 1 1 d . . . 
H11A H 0.3270 0.7771 0.0699 0.028 Uiso 1 1 calc R . . 
C12 C 0.4794(4) 0.8446(2) 0.1352(2) 0.0189(9) Uani 1 1 d . . . 
H12A H 0.4576 0.8305 0.1870 0.023 Uiso 1 1 calc R . . 
C13 C 0.5895(4) 0.8977(2) 0.1315(2) 0.0120(8) Uani 1 1 d . . . 
C14 C 0.9141(4) 1.0496(2) 0.3785(2) 0.0109(7) Uani 1 1 d . . . 
C15 C 0.8256(4) 1.0994(2) 0.4138(2) 0.0130(8) Uani 1 1 d . . . 
H15A H 0.7279 1.1044 0.3922 0.016 Uiso 1 1 calc R . . 
C16 C 0.8885(4) 1.1409(2) 0.4821(2) 0.0159(8) Uani 1 1 d . . . 
H16A H 0.8319 1.1751 0.5080 0.019 Uiso 1 1 calc R . . 
C17 C 1.0320(4) 1.1343(2) 0.5142(2) 0.0163(9) Uani 1 1 d . . . 
H17A H 1.0701 1.1647 0.5606 0.020 Uiso 1 1 calc R . . 
C18 C 1.1215(4) 1.0841(2) 0.4800(2) 0.0161(8) Uani 1 1 d . . . 
H18A H 1.2192 1.0791 0.5015 0.019 Uiso 1 1 calc R . . 
C19 C 1.0569(4) 1.0426(2) 0.4124(2) 0.0127(8) Uani 1 1 d . . . 
C20 C 1.0058(4) 0.9587(2) 0.3150(2) 0.0116(8) Uani 1 1 d . . . 
C21 C 1.0118(4) 0.8906(2) 0.2640(2) 0.0123(8) Uani 1 1 d . . . 
C22 C 1.1338(4) 0.8460(2) 0.2646(2) 0.0167(8) Uani 1 1 d . . . 
H22A H 1.2213 0.8621 0.2958 0.020 Uiso 1 1 calc R . . 
C23 C 1.1247(4) 0.7780(2) 0.2185(2) 0.0181(9) Uani 1 1 d . . . 
H23A H 1.2061 0.7468 0.2176 0.022 Uiso 1 1 calc R . . 
C24 C 0.9950(4) 0.7560(2) 0.1739(2) 0.0172(9) Uani 1 1 d . . . 
H24A H 0.9884 0.7088 0.1435 0.021 Uiso 1 1 calc R . . 
C25 C 0.8748(4) 0.8014(2) 0.1727(2) 0.0145(8) Uani 1 1 d . . . 
H25A H 0.7880 0.7848 0.1410 0.017 Uiso 1 1 calc R . . 
C26 C 0.8791(4) 0.8711(2) 0.2173(2) 0.0096(7) Uani 1 1 d . . . 
C27 C 0.6042(4) 1.1141(2) 0.2226(2) 0.0145(8) Uani 1 1 d . . . 
H27A H 0.6946 1.1258 0.2097 0.017 Uiso 1 1 calc R . . 
C28 C 0.5120(4) 1.1752(2) 0.2282(2) 0.0183(9) Uani 1 1 d . . . 
H28A H 0.5386 1.2275 0.2190 0.022 Uiso 1 1 calc R . . 
C29 C 0.3810(5) 1.1590(3) 0.2474(3) 0.0268(10) Uani 1 1 d . . . 
H29A H 0.3166 1.2000 0.2527 0.032 Uiso 1 1 calc R . . 
C30 C 0.3452(5) 1.0830(3) 0.2586(3) 0.0357(12) Uani 1 1 d . . . 
H30A H 0.2549 1.0707 0.2713 0.043 Uiso 1 1 calc R . . 
C31 C 0.4421(4) 1.0235(3) 0.2513(3) 0.0252(10) Uani 1 1 d . . . 
H31A H 0.4155 0.9708 0.2585 0.030 Uiso 1 1 calc R . . 
  
loop_ 
_atom_site_aniso_label 
_atom_site_aniso_U_11 
_atom_site_aniso_U_22 
_atom_site_aniso_U_33 
_atom_site_aniso_U_23 
_atom_site_aniso_U_13 
_atom_site_aniso_U_12 
Ir 0.00850(8) 0.00986(7) 0.00877(7) 0.00063(6) 0.00029(5) -0.00046(6) 
Cl 0.0160(5) 0.0188(5) 0.0127(4) 0.0035(4) 0.0022(4) -0.0040(4) 
O1 0.0203(15) 0.0161(14) 0.0108(14) 0.0018(11) 0.0016(11) -0.0040(12) 
O2 0.0095(13) 0.0137(13) 0.0138(14) -0.0008(11) -0.0011(11) 0.0006(11) 
N1 0.0095(16) 0.0112(16) 0.0080(15) 0.0016(12) -0.0010(12) -0.0008(13) 
N2 0.0130(17) 0.0094(16) 0.0107(16) 0.0027(12) 0.0027(13) -0.0032(13) 
N3 0.0101(16) 0.0141(17) 0.0103(15) 0.0009(12) -0.0028(12) 0.0021(13) 
C1 0.0125(19) 0.0093(18) 0.0169(19) 0.0026(15) 0.0031(15) 0.0065(16) 
C2 0.015(2) 0.016(2) 0.014(2) 0.0019(16) 0.0014(16) 0.0036(16) 
C3 0.017(2) 0.019(2) 0.025(2) 0.0035(18) 0.0000(17) -0.0018(18) 
C4 0.020(2) 0.017(2) 0.025(2) 0.0054(18) 0.0100(18) -0.0024(18) 
C5 0.019(2) 0.019(2) 0.018(2) 0.0009(17) 0.0077(17) -0.0007(17) 
C6 0.013(2) 0.0107(19) 0.0160(19) -0.0012(15) 0.0015(15) -0.0003(16) 
C7 0.014(2) 0.0126(18) 0.0104(18) 0.0010(14) 0.0001(15) 0.0016(16) 
C8 0.015(2) 0.0144(19) 0.015(2) 0.0014(16) 0.0000(16) -0.0011(16) 
C9 0.023(2) 0.021(2) 0.015(2) -0.0005(17) 0.0007(18) -0.0069(18) 
C10 0.031(3) 0.023(2) 0.018(2) -0.0025(18) -0.0065(19) -0.010(2) 
C11 0.021(2) 0.025(2) 0.023(2) 0.0009(18) -0.0028(18) -0.0098(19) 
C12 0.021(2) 0.019(2) 0.016(2) 0.0014(17) 0.0012(17) -0.0041(18) 
C13 0.011(2) 0.0102(18) 0.0125(19) -0.0015(14) -0.0045(15) 0.0010(15) 
C14 0.0135(19) 0.0110(17) 0.0073(16) 0.0054(15) -0.0005(14) -0.0034(16) 
C15 0.017(2) 0.0117(19) 0.0101(18) 0.0041(14) 0.0019(15) 0.0003(16) 
C16 0.025(2) 0.012(2) 0.0099(19) 0.0023(15) 0.0034(16) 0.0030(17) 
C17 0.025(2) 0.0103(19) 0.0126(19) 0.0002(15) 0.0013(17) -0.0064(17) 
C18 0.015(2) 0.016(2) 0.016(2) 0.0039(16) -0.0038(16) -0.0035(17) 
C19 0.0135(19) 0.0108(19) 0.0135(18) 0.0030(15) 0.0011(15) -0.0012(15) 
C20 0.0092(18) 0.013(2) 0.0117(18) 0.0039(15) 0.0005(14) 0.0010(15) 
C21 0.018(2) 0.0114(18) 0.0080(18) 0.0021(14) 0.0026(15) -0.0021(16) 
C22 0.013(2) 0.019(2) 0.017(2) 0.0038(16) 0.0003(16) 0.0012(17) 
C23 0.019(2) 0.016(2) 0.020(2) 0.0045(16) 0.0071(17) 0.0099(17) 
C24 0.028(2) 0.0124(19) 0.013(2) 0.0033(15) 0.0084(18) 0.0039(18) 
C25 0.020(2) 0.0149(19) 0.0096(18) 0.0008(15) 0.0050(16) -0.0016(17) 
C26 0.0072(18) 0.0152(19) 0.0056(17) 0.0049(14) -0.0010(14) 0.0023(15) 
C27 0.014(2) 0.0138(19) 0.015(2) -0.0026(15) 0.0003(16) -0.0045(16) 
C28 0.019(2) 0.017(2) 0.017(2) -0.0036(16) -0.0036(17) 0.0043(17) 
C29 0.022(2) 0.028(2) 0.030(2) -0.004(2) 0.0022(19) 0.015(2) 
C30 0.015(2) 0.046(3) 0.050(3) 0.009(3) 0.018(2) 0.007(2) 
C31 0.014(2) 0.028(2) 0.035(3) 0.009(2) 0.0085(19) 0.0005(19) 
  
_geom_special_details 
; 
 All esds (except the esd in the dihedral angle between two l.s. planes) 
 are estimated using the full covariance matrix.  The cell esds are taken 
 into account individually in the estimation of esds in distances, angles 
 and torsion angles; correlations between esds in cell parameters are only 
 used when they are defined by crystal symmetry.  An approximate (isotropic) 
 treatment of cell esds is used for estimating esds involving l.s. planes. 
; 
  
loop_ 
_geom_bond_atom_site_label_1 
_geom_bond_atom_site_label_2 
_geom_bond_distance 
_geom_bond_site_symmetry_2 
_geom_bond_publ_flag 
Ir C13 2.007(4) . ? 
Ir C26 2.018(3) . ? 
Ir N1 2.046(3) . ? 
Ir N3 2.146(3) . ? 
Ir N2 2.155(3) . ? 
Ir Cl 2.3570(9) . ? 
O1 C7 1.372(4) . ? 
O1 C6 1.385(4) . ? 
O2 C20 1.348(4) . ? 
O2 C19 1.377(4) . ? 
N1 C7 1.310(5) . ? 
N1 C1 1.404(5) . ? 
N2 C20 1.298(4) . ? 
N2 C14 1.400(4) . ? 
N3 C31 1.347(5) . ? 
N3 C27 1.353(4) . ? 
C1 C2 1.377(5) . ? 
C1 C6 1.391(5) . ? 
C2 C3 1.407(5) . ? 
C2 H2A 0.9500 . ? 
C3 C4 1.380(6) . ? 
C3 H3A 0.9500 . ? 
C4 C5 1.385(6) . ? 
C4 H4A 0.9500 . ? 
C5 C6 1.376(5) . ? 
C5 H5A 0.9500 . ? 
C7 C8 1.421(5) . ? 
C8 C9 1.397(5) . ? 
C8 C13 1.405(5) . ? 
C9 C10 1.368(6) . ? 
C9 H9A 0.9500 . ? 
C10 C11 1.400(6) . ? 
C10 H10A 0.9500 . ? 
C11 C12 1.384(6) . ? 
C11 H11A 0.9500 . ? 
C12 C13 1.404(5) . ? 
C12 H12A 0.9500 . ? 
C14 C19 1.397(5) . ? 
C14 C15 1.400(5) . ? 
C15 C16 1.385(5) . ? 
C15 H15A 0.9500 . ? 
C16 C17 1.395(6) . ? 
C16 H16A 0.9500 . ? 
C17 C18 1.402(5) . ? 
C17 H17A 0.9500 . ? 
C18 C19 1.381(5) . ? 
C18 H18A 0.9500 . ? 
C20 C21 1.447(5) . ? 
C21 C22 1.396(5) . ? 
C21 C26 1.415(5) . ? 
C22 C23 1.387(5) . ? 
C22 H22A 0.9500 . ? 
C23 C24 1.388(6) . ? 
C23 H23A 0.9500 . ? 
C24 C25 1.389(5) . ? 
C24 H24A 0.9500 . ? 
C25 C26 1.401(5) . ? 
C25 H25A 0.9500 . ? 
C27 C28 1.384(5) . ? 
C27 H27A 0.9500 . ? 
C28 C29 1.377(6) . ? 
C28 H28A 0.9500 . ? 
C29 C30 1.366(6) . ? 
C29 H29A 0.9500 . ? 
C30 C31 1.398(6) . ? 
C30 H30A 0.9500 . ? 
C31 H31A 0.9500 . ? 
  
loop_ 
_geom_angle_atom_site_label_1 
_geom_angle_atom_site_label_2 
_geom_angle_atom_site_label_3 
_geom_angle 
_geom_angle_site_symmetry_1 
_geom_angle_site_symmetry_3 
_geom_angle_publ_flag 
C13 Ir C26 93.73(14) . . ? 
C13 Ir N1 79.52(13) . . ? 
C26 Ir N1 87.64(13) . . ? 
C13 Ir N3 91.43(13) . . ? 
C26 Ir N3 174.24(13) . . ? 
N1 Ir N3 90.79(11) . . ? 
C13 Ir N2 172.26(13) . . ? 
C26 Ir N2 79.24(13) . . ? 
N1 Ir N2 96.82(11) . . ? 
N3 Ir N2 95.46(11) . . ? 
C13 Ir Cl 94.45(11) . . ? 
C26 Ir Cl 90.57(10) . . ? 
N1 Ir Cl 173.58(9) . . ? 
N3 Ir Cl 91.58(8) . . ? 
N2 Ir Cl 88.89(8) . . ? 
C7 O1 C6 104.5(3) . . ? 
C20 O2 C19 104.5(3) . . ? 
C7 N1 C1 106.4(3) . . ? 
C7 N1 Ir 112.7(2) . . ? 
C1 N1 Ir 140.6(3) . . ? 
C20 N2 C14 105.6(3) . . ? 
C20 N2 Ir 111.2(2) . . ? 
C14 N2 Ir 143.0(2) . . ? 
C31 N3 C27 117.2(3) . . ? 
C31 N3 Ir 122.8(3) . . ? 
C27 N3 Ir 120.0(2) . . ? 
C2 C1 C6 120.5(3) . . ? 
C2 C1 N1 132.5(3) . . ? 
C6 C1 N1 106.9(3) . . ? 
C1 C2 C3 116.4(4) . . ? 
C1 C2 H2A 121.8 . . ? 
C3 C2 H2A 121.8 . . ? 
C4 C3 C2 121.6(4) . . ? 
C4 C3 H3A 119.2 . . ? 
C2 C3 H3A 119.2 . . ? 
C3 C4 C5 122.3(4) . . ? 
C3 C4 H4A 118.8 . . ? 
C5 C4 H4A 118.8 . . ? 
C6 C5 C4 115.2(4) . . ? 
C6 C5 H5A 122.4 . . ? 
C4 C5 H5A 122.4 . . ? 
C5 C6 O1 127.5(3) . . ? 
C5 C6 C1 123.9(4) . . ? 
O1 C6 C1 108.7(3) . . ? 
N1 C7 O1 113.6(3) . . ? 
N1 C7 C8 120.8(3) . . ? 
O1 C7 C8 125.7(3) . . ? 
C9 C8 C13 124.0(4) . . ? 
C9 C8 C7 125.4(4) . . ? 
C13 C8 C7 110.6(3) . . ? 
C10 C9 C8 119.0(4) . . ? 
C10 C9 H9A 120.5 . . ? 
C8 C9 H9A 120.5 . . ? 
C9 C10 C11 119.1(4) . . ? 
C9 C10 H10A 120.5 . . ? 
C11 C10 H10A 120.5 . . ? 
C12 C11 C10 121.1(4) . . ? 
C12 C11 H11A 119.4 . . ? 
C10 C11 H11A 119.4 . . ? 
C11 C12 C13 121.7(4) . . ? 
C11 C12 H12A 119.2 . . ? 
C13 C12 H12A 119.2 . . ? 
C12 C13 C8 115.0(3) . . ? 
C12 C13 Ir 129.2(3) . . ? 
C8 C13 Ir 115.8(3) . . ? 
C19 C14 C15 120.5(3) . . ? 
C19 C14 N2 106.8(3) . . ? 
C15 C14 N2 132.4(3) . . ? 
C16 C15 C14 116.3(4) . . ? 
C16 C15 H15A 121.9 . . ? 
C14 C15 H15A 121.9 . . ? 
C17 C16 C15 122.4(4) . . ? 
C17 C16 H16A 118.8 . . ? 
C15 C16 H16A 118.8 . . ? 
C16 C17 C18 122.0(4) . . ? 
C16 C17 H17A 119.0 . . ? 
C18 C17 H17A 119.0 . . ? 
C19 C18 C17 114.9(4) . . ? 
C19 C18 H18A 122.5 . . ? 
C17 C18 H18A 122.5 . . ? 
O2 C19 C18 127.8(4) . . ? 
O2 C19 C14 108.2(3) . . ? 
C18 C19 C14 123.9(3) . . ? 
N2 C20 O2 114.9(3) . . ? 
N2 C20 C21 120.6(3) . . ? 
O2 C20 C21 124.3(3) . . ? 
C22 C21 C26 123.5(3) . . ? 
C22 C21 C20 123.6(4) . . ? 
C26 C21 C20 112.8(3) . . ? 
C21 C22 C23 118.7(4) . . ? 
C21 C22 H22A 120.6 . . ? 
C23 C22 H22A 120.6 . . ? 
C24 C23 C22 119.2(4) . . ? 
C24 C23 H23A 120.4 . . ? 
C22 C23 H23A 120.4 . . ? 
C23 C24 C25 121.7(4) . . ? 
C23 C24 H24A 119.1 . . ? 
C25 C24 H24A 119.1 . . ? 
C24 C25 C26 121.2(4) . . ? 
C24 C25 H25A 119.4 . . ? 
C26 C25 H25A 119.4 . . ? 
C25 C26 C21 115.7(3) . . ? 
C25 C26 Ir 128.9(3) . . ? 
C21 C26 Ir 115.5(3) . . ? 
N3 C27 C28 123.1(4) . . ? 
N3 C27 H27A 118.5 . . ? 
C28 C27 H27A 118.5 . . ? 
C29 C28 C27 119.0(4) . . ? 
C29 C28 H28A 120.5 . . ? 
C27 C28 H28A 120.5 . . ? 
C30 C29 C28 119.0(4) . . ? 
C30 C29 H29A 120.5 . . ? 
C28 C29 H29A 120.5 . . ? 
C29 C30 C31 119.6(4) . . ? 
C29 C30 H30A 120.2 . . ? 
C31 C30 H30A 120.2 . . ? 
N3 C31 C30 122.2(4) . . ? 
N3 C31 H31A 118.9 . . ? 
C30 C31 H31A 118.9 . . ? 
  
_diffrn_measured_fraction_theta_max 0.855 
_diffrn_reflns_theta_full        26.00 
_diffrn_measured_fraction_theta_full 0.998 
_refine_diff_density_max         1.296 
_refine_diff_density_min         -0.974 
_refine_diff_density_rms         0.126 
  
loop_ 
  _platon_squeeze_void_nr 
  _platon_squeeze_void_average_x 
  _platon_squeeze_void_average_y 
  _platon_squeeze_void_average_z 
  _platon_squeeze_void_volume 
  _platon_squeeze_void_count_electrons 
  _platon_squeeze_void_content 
   1  0.500  0.500  0.000       134        31 ' ' 
   2  0.500  0.000  0.500       134        31 ' ' 
_platon_squeeze_details 
; 
; 
