# Supplementary material
Source: MDPI journal article supplement (https://www.mdpi.com/2304-6740/6/4/118)
Supplement: s1 [file s1 › inorganics-371116-supplementary/2. pbompy.cif]

 
data_pbompy 
  
_audit_creation_method           SHELXL-97 
_chemical_name_systematic        ? 
_chemical_name_common            ? 
_chemical_formula_moiety         'C32 H23 Cl Ir N3 O2' 
_chemical_formula_sum            'C32 H23 Cl Ir N3 O2' 
_chemical_melting_point          ? 
  
_exptl_crystal_description       parallelepiped 
_exptl_crystal_colour            yellow 
  
_diffrn_ambient_temperature      110(2) 
_chemical_formula_weight         709.18 
  
loop_ 
_atom_type_symbol 
_atom_type_description 
_atom_type_scat_dispersion_real 
_atom_type_scat_dispersion_imag 
_atom_type_scat_source 
C C 0.0033 0.0016 'International Tables Vol C Tables 4.2.6.8 and 6.1.1.4' 
H H 0.0000 0.0000 'International Tables Vol C Tables 4.2.6.8 and 6.1.1.4' 
N N 0.0061 0.0033 'International Tables Vol C Tables 4.2.6.8 and 6.1.1.4' 
O O 0.0106 0.0060 'International Tables Vol C Tables 4.2.6.8 and 6.1.1.4' 
Cl Cl 0.1484 0.1585 'International Tables Vol C Tables 4.2.6.8 and 6.1.1.4' 
Ir Ir -1.4442 7.9887 'International Tables Vol C Tables 4.2.6.8 and 6.1.1.4' 
  
_symmetry_cell_setting           triclinic 
_symmetry_space_group_name_H-M   'P -1' 
_symmetry_int_tables_number      2 
_chemical_absolute_configuration ? 
  
loop_ 
_symmetry_equiv_pos_as_xyz 
'x, y, z' 
'-x, -y, -z' 
  
_cell_length_a                   12.2515(4) 
_cell_length_b                   13.7904(4) 
_cell_length_c                   17.8219(5) 
_cell_angle_alpha                73.583(3) 
_cell_angle_beta                 78.557(2) 
_cell_angle_gamma                71.135(3) 
_cell_volume                     2714.09(14) 
_cell_formula_units_Z            4 
_cell_measurement_temperature    110(2) 
_cell_measurement_reflns_used    14519 
_cell_measurement_theta_min      3.0227 
_cell_measurement_theta_max      29.1681 
_exptl_crystal_size_max          0.70 
_exptl_crystal_size_mid          0.56 
_exptl_crystal_size_min          0.46 
_exptl_crystal_density_meas      ? 
_exptl_crystal_density_diffrn    1.736 
_exptl_crystal_density_method    'not measured' 
_exptl_crystal_F_000             1384 
_exptl_absorpt_coefficient_mu    5.053 
_exptl_absorpt_correction_type   multi-scan 
_exptl_absorpt_correction_T_min  0.54483 
_exptl_absorpt_correction_T_max  1.00000 
_exptl_absorpt_process_details 
; 
CrysAlisPro, Oxford Diffraction Ltd., 
Version 1.171.33.66 (release 28-04-2010 CrysAlis171 .NET) 
(compiled Apr 28 2010,14:27:37) 
Empirical absorption correction using spherical harmonics, 
 implemented in SCALE3 ABSPACK scaling algorithm. 
; 
  
_exptl_special_details 
; 
 ? 
; 
_diffrn_radiation_probe          x-ray 
_diffrn_radiation_type           MoK\a 
_diffrn_radiation_wavelength     0.71073 
_diffrn_source                   'fine-focus sealed tube' 
_diffrn_radiation_monochromator  graphite 
_diffrn_measurement_device_type  'CCD detector' 
_diffrn_measurement_method       '\w scans' 
_diffrn_detector_area_resol_mean ? 
_diffrn_reflns_number            24208 
_diffrn_reflns_av_R_equivalents  0.0229 
_diffrn_reflns_av_sigmaI/netI    0.0496 
_diffrn_reflns_limit_h_min       -16 
_diffrn_reflns_limit_h_max       16 
_diffrn_reflns_limit_k_min       -17 
_diffrn_reflns_limit_k_max       18 
_diffrn_reflns_limit_l_min       -22 
_diffrn_reflns_limit_l_max       24 
_diffrn_reflns_theta_min         3.03 
_diffrn_reflns_theta_max         29.23 
_reflns_number_total             12516 
_reflns_number_gt                9536 
_reflns_threshold_expression     >2sigma(I) 
  
_computing_data_collection 
; 
CrysAlis CCD, Oxford Diffraction Ltd., 
Version 1.171.32.29 (release 10-06-2008 CrysAlis171 .NET) 
(compiled Jun 10 2008,16:49:55) 
; 
_computing_cell_refinement 
; 
CrysAlis RED, Oxford Diffraction Ltd., 
Version 1.171.32.29 (release 10-06-2008 CrysAlis171 .NET) 
(compiled Jun 10 2008,16:49:55) 
; 
_computing_data_reduction 
; 
CrysAlis RED, Oxford Diffraction Ltd., 
Version 1.171.32.29 (release 10-06-2008 CrysAlis171 .NET) 
(compiled Jun 10 2008,16:49:55) 
; 
_computing_structure_solution    'SHELXS-97 (Sheldrick, 2008)' 
_computing_structure_refinement  'SHELXL-97 (Sheldrick, 2008)' 
_computing_molecular_graphics    'Bruker SHELXTL' 
_computing_publication_material  'Bruker SHELXTL' 
  
_refine_special_details 
; 
 Refinement of F^2^ against ALL reflections.  The weighted R-factor wR and 
 goodness of fit S are based on F^2^, conventional R-factors R are based 
 on F, with F set to zero for negative F^2^. The threshold expression of 
 F^2^ > 2sigma(F^2^) is used only for calculating R-factors(gt) etc. and is 
 not relevant to the choice of reflections for refinement.  R-factors based 
 on F^2^ are statistically about twice as large as those based on F, and R- 
 factors based on ALL data will be even larger. 
; 
  
_refine_ls_structure_factor_coef Fsqd 
_refine_ls_matrix_type           full 
_refine_ls_weighting_scheme      calc 
_refine_ls_weighting_details 
'calc w=1/[\s^2^(Fo^2^)+(0.0175P)^2^+0.0000P] where P=(Fo^2^+2Fc^2^)/3' 
_atom_sites_solution_primary     direct 
_atom_sites_solution_secondary   difmap 
_atom_sites_solution_hydrogens   geom 
_refine_ls_hydrogen_treatment    constr 
_refine_ls_extinction_method     none 
_refine_ls_extinction_coef       ? 
_refine_ls_number_reflns         12516 
_refine_ls_number_parameters     697 
_refine_ls_number_restraints     0 
_refine_ls_R_factor_all          0.0365 
_refine_ls_R_factor_gt           0.0239 
_refine_ls_wR_factor_ref         0.0476 
_refine_ls_wR_factor_gt          0.0462 
_refine_ls_goodness_of_fit_ref   1.018 
_refine_ls_restrained_S_all      1.018 
_refine_ls_shift/su_max          0.002 
_refine_ls_shift/su_mean         0.000 
  
loop_ 
_atom_site_label 
_atom_site_type_symbol 
_atom_site_fract_x 
_atom_site_fract_y 
_atom_site_fract_z 
_atom_site_U_iso_or_equiv 
_atom_site_adp_type 
_atom_site_occupancy 
_atom_site_symmetry_multiplicity 
_atom_site_calc_flag 
_atom_site_refinement_flags 
_atom_site_disorder_assembly 
_atom_site_disorder_group 
Ir1 Ir 0.916704(12) 0.742695(10) -0.335491(7) 0.01280(4) Uani 1 1 d . . . 
Cl1 Cl 1.07265(7) 0.71586(7) -0.43614(5) 0.01884(19) Uani 1 1 d . . . 
O1 O 0.8454(2) 1.05602(18) -0.46534(13) 0.0198(6) Uani 1 1 d . . . 
O2 O 0.7315(2) 0.67754(17) -0.11812(12) 0.0167(5) Uani 1 1 d . . . 
N1 N 0.8385(2) 0.8892(2) -0.41637(15) 0.0150(6) Uani 1 1 d . . . 
N2 N 0.7909(2) 0.7529(2) -0.24117(15) 0.0148(6) Uani 1 1 d . . . 
N3 N 0.8307(2) 0.6520(2) -0.37428(15) 0.0153(6) Uani 1 1 d . . . 
C1 C 0.7652(3) 0.9362(3) -0.47632(19) 0.0158(8) Uani 1 1 d . . . 
C2 C 0.6929(3) 0.9018(3) -0.5058(2) 0.0200(8) Uani 1 1 d . . . 
H2A H 0.6870 0.8318 -0.4868 0.024 Uiso 1 1 calc R . . 
C3 C 0.6294(3) 0.9725(3) -0.5639(2) 0.0240(9) Uani 1 1 d . . . 
H3A H 0.5783 0.9507 -0.5850 0.029 Uiso 1 1 calc R . . 
C4 C 0.6375(3) 1.0751(3) -0.5928(2) 0.0230(8) Uani 1 1 d . . . 
H4A H 0.5919 1.1217 -0.6329 0.028 Uiso 1 1 calc R . . 
C5 C 0.7113(3) 1.1105(3) -0.56397(19) 0.0205(8) Uani 1 1 d . . . 
H5A H 0.7193 1.1798 -0.5836 0.025 Uiso 1 1 calc R . . 
C6 C 0.7711(3) 1.0390(3) -0.50566(19) 0.0171(8) Uani 1 1 d . . . 
C7 C 0.8812(3) 0.9625(3) -0.41295(19) 0.0173(8) Uani 1 1 d . . . 
C8 C 0.9607(3) 0.9448(3) -0.35762(19) 0.0159(7) Uani 1 1 d . . . 
C9 C 1.0049(3) 1.0240(3) -0.3517(2) 0.0210(8) Uani 1 1 d . . . 
H9A H 0.9827 1.0929 -0.3846 0.025 Uiso 1 1 calc R . . 
C10 C 1.0804(3) 1.0002(3) -0.2978(2) 0.0226(9) Uani 1 1 d . . . 
H10A H 1.1112 1.0526 -0.2926 0.027 Uiso 1 1 calc R . . 
C11 C 1.1117(3) 0.8990(3) -0.2509(2) 0.0202(8) Uani 1 1 d . . . 
H11A H 1.1647 0.8824 -0.2138 0.024 Uiso 1 1 calc R . . 
C12 C 1.0673(3) 0.8216(3) -0.25693(19) 0.0171(8) Uani 1 1 d . . . 
H12A H 1.0906 0.7531 -0.2236 0.021 Uiso 1 1 calc R . . 
C13 C 0.9887(3) 0.8410(3) -0.31069(18) 0.0139(7) Uani 1 1 d . . . 
C14 C 0.6770(3) 0.8126(3) -0.22189(19) 0.0152(7) Uani 1 1 d . . . 
C15 C 0.6026(3) 0.9023(3) -0.2632(2) 0.0208(8) Uani 1 1 d . . . 
H15A H 0.6255 0.9368 -0.3154 0.025 Uiso 1 1 calc R . . 
C16 C 0.4946(3) 0.9387(3) -0.2248(2) 0.0260(9) Uani 1 1 d . . . 
H16A H 0.4416 1.0003 -0.2509 0.031 Uiso 1 1 calc R . . 
C17 C 0.4601(3) 0.8876(3) -0.1481(2) 0.0263(9) Uani 1 1 d . . . 
H17A H 0.3839 0.9150 -0.1241 0.032 Uiso 1 1 calc R . . 
C18 C 0.5337(3) 0.7986(3) -0.1066(2) 0.0207(8) Uani 1 1 d . . . 
H18A H 0.5109 0.7635 -0.0546 0.025 Uiso 1 1 calc R . . 
C19 C 0.6420(3) 0.7645(3) -0.14546(19) 0.0158(8) Uani 1 1 d . . . 
C20 C 0.8182(3) 0.6754(3) -0.17892(18) 0.0142(7) Uani 1 1 d . . . 
C21 C 0.9291(3) 0.6009(2) -0.17895(18) 0.0135(7) Uani 1 1 d . . . 
C22 C 0.9720(3) 0.5228(3) -0.11384(19) 0.0179(8) Uani 1 1 d . . . 
H22A H 0.9242 0.5129 -0.0649 0.021 Uiso 1 1 calc R . . 
C23 C 1.0845(3) 0.4606(3) -0.1220(2) 0.0198(8) Uani 1 1 d . . . 
H23A H 1.1156 0.4074 -0.0783 0.024 Uiso 1 1 calc R . . 
C24 C 1.1526(3) 0.4753(3) -0.1937(2) 0.0181(8) Uani 1 1 d . . . 
H24A H 1.2308 0.4325 -0.1986 0.022 Uiso 1 1 calc R . . 
C25 C 1.1090(3) 0.5514(3) -0.2586(2) 0.0163(8) Uani 1 1 d . . . 
H25A H 1.1567 0.5578 -0.3077 0.020 Uiso 1 1 calc R . . 
C26 C 0.9966(3) 0.6186(2) -0.25322(19) 0.0158(8) Uani 1 1 d . . . 
C27 C 0.7177(3) 0.6595(3) -0.3547(2) 0.0338(10) Uani 1 1 d . . . 
H27A H 0.6757 0.6976 -0.3162 0.041 Uiso 1 1 calc R . . 
C28 C 0.6590(4) 0.6147(3) -0.3874(2) 0.0366(11) Uani 1 1 d . . . 
H28A H 0.5782 0.6237 -0.3717 0.044 Uiso 1 1 calc R . . 
C29 C 0.7158(3) 0.5571(3) -0.44264(19) 0.0180(8) Uani 1 1 d . . . 
C30 C 0.8311(4) 0.5469(3) -0.4601(2) 0.0376(11) Uani 1 1 d . . . 
H30A H 0.8752 0.5076 -0.4975 0.045 Uiso 1 1 calc R . . 
C31 C 0.8861(4) 0.5924(3) -0.4249(2) 0.0362(11) Uani 1 1 d . . . 
H31A H 0.9677 0.5804 -0.4374 0.043 Uiso 1 1 calc R . . 
C32 C 0.6535(3) 0.5101(3) -0.4813(2) 0.0255(9) Uani 1 1 d . . . 
H32A H 0.7091 0.4721 -0.5184 0.038 Uiso 1 1 calc R . . 
H32B H 0.5933 0.5664 -0.5098 0.038 Uiso 1 1 calc R . . 
H32C H 0.6175 0.4610 -0.4410 0.038 Uiso 1 1 calc R . . 
Ir2 Ir 0.432782(12) 0.702369(10) 0.186792(7) 0.01268(4) Uani 1 1 d . . . 
Cl2 Cl 0.60225(7) 0.71638(6) 0.09955(5) 0.01893(19) Uani 1 1 d . . . 
O3 O 0.1966(2) 0.72553(18) 0.38266(13) 0.0208(6) Uani 1 1 d . . . 
O4 O 0.4078(2) 0.48249(17) 0.07542(13) 0.0176(5) Uani 1 1 d . . . 
N4 N 0.2912(2) 0.6947(2) 0.26737(16) 0.0154(6) Uani 1 1 d . . . 
N5 N 0.3863(2) 0.6346(2) 0.10578(15) 0.0146(6) Uani 1 1 d . . . 
N6 N 0.3450(2) 0.8683(2) 0.13689(16) 0.0136(6) Uani 1 1 d . . . 
C33 C 0.1821(3) 0.6802(3) 0.2739(2) 0.0175(8) Uani 1 1 d . . . 
C34 C 0.1286(3) 0.6522(3) 0.2262(2) 0.0272(9) Uani 1 1 d . . . 
H34A H 0.1671 0.6366 0.1774 0.033 Uiso 1 1 calc R . . 
C35 C 0.0152(3) 0.6476(3) 0.2523(2) 0.0344(10) Uani 1 1 d . . . 
H35A H -0.0242 0.6275 0.2210 0.041 Uiso 1 1 calc R . . 
C36 C -0.0422(3) 0.6718(3) 0.3238(2) 0.0357(11) Uani 1 1 d . . . 
H36A H -0.1201 0.6688 0.3392 0.043 Uiso 1 1 calc R . . 
C37 C 0.0105(3) 0.6997(3) 0.3722(2) 0.0274(9) Uani 1 1 d . . . 
H37A H -0.0278 0.7163 0.4208 0.033 Uiso 1 1 calc R . . 
C38 C 0.1221(3) 0.7018(3) 0.3454(2) 0.0191(8) Uani 1 1 d . . . 
C39 C 0.2946(3) 0.7201(2) 0.33240(19) 0.0159(8) Uani 1 1 d . . . 
C40 C 0.3963(3) 0.7432(2) 0.34251(19) 0.0166(8) Uani 1 1 d . . . 
C41 C 0.4140(3) 0.7612(3) 0.4115(2) 0.0202(8) Uani 1 1 d . . . 
H41A H 0.3559 0.7612 0.4557 0.024 Uiso 1 1 calc R . . 
C42 C 0.5163(3) 0.7790(3) 0.4148(2) 0.0233(9) Uani 1 1 d . . . 
H42A H 0.5308 0.7911 0.4613 0.028 Uiso 1 1 calc R . . 
C43 C 0.5991(3) 0.7791(3) 0.3483(2) 0.0241(9) Uani 1 1 d . . . 
H43A H 0.6702 0.7917 0.3504 0.029 Uiso 1 1 calc R . . 
C44 C 0.5810(3) 0.7614(3) 0.2796(2) 0.0186(8) Uani 1 1 d . . . 
H44A H 0.6392 0.7627 0.2356 0.022 Uiso 1 1 calc R . . 
C45 C 0.4777(3) 0.7417(2) 0.27452(19) 0.0147(7) Uani 1 1 d . . . 
C46 C 0.3186(3) 0.6555(3) 0.04574(19) 0.0152(8) Uani 1 1 d . . . 
C47 C 0.2425(3) 0.7473(3) 0.00810(19) 0.0193(8) Uani 1 1 d . . . 
H47A H 0.2315 0.8132 0.0196 0.023 Uiso 1 1 calc R . . 
C48 C 0.1836(3) 0.7379(3) -0.04696(19) 0.0218(8) Uani 1 1 d . . . 
H48A H 0.1299 0.7989 -0.0734 0.026 Uiso 1 1 calc R . . 
C49 C 0.2006(3) 0.6420(3) -0.0646(2) 0.0240(9) Uani 1 1 d . . . 
H49A H 0.1586 0.6395 -0.1031 0.029 Uiso 1 1 calc R . . 
C50 C 0.2760(3) 0.5504(3) -0.02832(19) 0.0209(8) Uani 1 1 d . . . 
H50A H 0.2884 0.4847 -0.0406 0.025 Uiso 1 1 calc R . . 
C51 C 0.3322(3) 0.5614(3) 0.02724(18) 0.0156(8) Uani 1 1 d . . . 
C52 C 0.4346(3) 0.5325(3) 0.12108(19) 0.0144(7) Uani 1 1 d . . . 
C53 C 0.5050(3) 0.4789(3) 0.18507(18) 0.0138(7) Uani 1 1 d . . . 
C54 C 0.5590(3) 0.3709(3) 0.20210(19) 0.0164(8) Uani 1 1 d . . . 
H54A H 0.5508 0.3278 0.1716 0.020 Uiso 1 1 calc R . . 
C55 C 0.6248(3) 0.3281(3) 0.2640(2) 0.0183(8) Uani 1 1 d . . . 
H55A H 0.6638 0.2547 0.2761 0.022 Uiso 1 1 calc R . . 
C56 C 0.6340(3) 0.3919(3) 0.3087(2) 0.0191(8) Uani 1 1 d . . . 
H56A H 0.6789 0.3617 0.3517 0.023 Uiso 1 1 calc R . . 
C57 C 0.5784(3) 0.4997(3) 0.29137(19) 0.0152(5) Uani 1 1 d . . . 
H57A H 0.5852 0.5416 0.3234 0.018 Uiso 1 1 calc R . . 
C58 C 0.5119(3) 0.5483(3) 0.22709(19) 0.0152(5) Uani 1 1 d . . . 
C59 C 0.2572(3) 0.9253(3) 0.1775(2) 0.0274(9) Uani 1 1 d . . . 
H59A H 0.2340 0.8931 0.2303 0.033 Uiso 1 1 calc R . . 
C60 C 0.1984(3) 1.0274(3) 0.1476(2) 0.0279(9) Uani 1 1 d . . . 
H60A H 0.1356 1.0635 0.1796 0.033 Uiso 1 1 calc R . . 
C61 C 0.2282(3) 1.0789(3) 0.0724(2) 0.0178(8) Uani 1 1 d . . . 
C62 C 0.3231(3) 1.0212(3) 0.0306(2) 0.0248(9) Uani 1 1 d . . . 
H62A H 0.3498 1.0535 -0.0214 0.030 Uiso 1 1 calc R . . 
C63 C 0.3783(3) 0.9190(3) 0.0632(2) 0.0230(9) Uani 1 1 d . . . 
H63A H 0.4427 0.8818 0.0330 0.028 Uiso 1 1 calc R . . 
C64 C 0.1632(3) 1.1901(3) 0.0367(2) 0.0282(9) Uani 1 1 d . . . 
H64A H 0.1000 1.2171 0.0754 0.042 Uiso 1 1 calc R . . 
H64B H 0.1308 1.1914 -0.0098 0.042 Uiso 1 1 calc R . . 
H64C H 0.2162 1.2343 0.0212 0.042 Uiso 1 1 calc R . . 
  
loop_ 
_atom_site_aniso_label 
_atom_site_aniso_U_11 
_atom_site_aniso_U_22 
_atom_site_aniso_U_33 
_atom_site_aniso_U_23 
_atom_site_aniso_U_13 
_atom_site_aniso_U_12 
Ir1 0.01129(8) 0.01219(7) 0.01132(7) 0.00158(6) 0.00043(6) -0.00333(6) 
Cl1 0.0166(5) 0.0222(4) 0.0162(4) -0.0038(4) 0.0054(4) -0.0085(4) 
O1 0.0251(16) 0.0160(12) 0.0165(13) 0.0065(10) -0.0093(11) -0.0085(12) 
O2 0.0132(14) 0.0188(13) 0.0111(12) 0.0004(10) 0.0014(10) -0.0002(11) 
N1 0.0132(16) 0.0166(15) 0.0136(15) 0.0012(12) 0.0009(12) -0.0079(13) 
N2 0.0134(16) 0.0140(14) 0.0146(15) -0.0020(12) -0.0001(12) -0.0028(13) 
N3 0.0130(16) 0.0149(15) 0.0140(15) 0.0011(12) 0.0006(13) -0.0041(13) 
C1 0.0144(19) 0.0173(18) 0.0107(17) -0.0007(14) 0.0017(15) -0.0021(16) 
C2 0.021(2) 0.0144(18) 0.022(2) 0.0000(15) -0.0052(16) -0.0044(16) 
C3 0.025(2) 0.024(2) 0.024(2) -0.0066(17) -0.0043(17) -0.0073(18) 
C4 0.028(2) 0.0199(19) 0.0156(19) -0.0006(15) -0.0085(17) 0.0006(17) 
C5 0.029(2) 0.0127(17) 0.0162(19) 0.0011(14) -0.0047(17) -0.0043(17) 
C6 0.021(2) 0.0174(18) 0.0130(18) -0.0034(14) -0.0012(15) -0.0058(16) 
C7 0.014(2) 0.0188(18) 0.0139(18) 0.0009(15) 0.0020(15) -0.0036(16) 
C8 0.0117(19) 0.0160(17) 0.0155(18) 0.0001(14) -0.0005(15) -0.0018(15) 
C9 0.022(2) 0.0139(17) 0.025(2) -0.0028(15) 0.0005(17) -0.0065(17) 
C10 0.022(2) 0.022(2) 0.028(2) -0.0100(17) -0.0013(18) -0.0112(18) 
C11 0.015(2) 0.028(2) 0.0180(19) -0.0082(16) -0.0010(16) -0.0041(17) 
C12 0.013(2) 0.0188(18) 0.0141(18) -0.0045(15) 0.0032(15) 0.0001(16) 
C13 0.0106(18) 0.0155(17) 0.0117(17) -0.0019(14) 0.0047(14) -0.0030(15) 
C14 0.015(2) 0.0147(17) 0.0171(18) -0.0054(14) -0.0024(15) -0.0048(16) 
C15 0.020(2) 0.0138(17) 0.020(2) 0.0023(15) -0.0029(16) 0.0006(16) 
C16 0.022(2) 0.0172(19) 0.030(2) -0.0025(16) -0.0075(18) 0.0060(17) 
C17 0.020(2) 0.026(2) 0.027(2) -0.0128(17) 0.0061(18) 0.0015(18) 
C18 0.022(2) 0.0211(19) 0.0152(19) -0.0039(15) 0.0020(16) -0.0033(17) 
C19 0.017(2) 0.0114(17) 0.0165(18) -0.0034(14) 0.0010(15) -0.0025(15) 
C20 0.017(2) 0.0161(17) 0.0074(17) -0.0002(14) 0.0028(15) -0.0063(16) 
C21 0.0114(19) 0.0133(16) 0.0139(17) -0.0008(14) -0.0005(14) -0.0036(15) 
C22 0.021(2) 0.0146(17) 0.0148(18) -0.0002(14) 0.0012(16) -0.0056(16) 
C23 0.025(2) 0.0151(18) 0.0191(19) 0.0012(15) -0.0121(17) -0.0042(17) 
C24 0.0117(19) 0.0132(17) 0.028(2) -0.0015(15) -0.0056(16) -0.0024(15) 
C25 0.0122(19) 0.0177(18) 0.0182(18) -0.0023(15) 0.0002(15) -0.0060(16) 
C26 0.018(2) 0.0115(17) 0.0193(19) -0.0019(14) -0.0014(16) -0.0074(16) 
C27 0.021(2) 0.055(3) 0.036(2) -0.030(2) 0.0155(19) -0.019(2) 
C28 0.022(2) 0.061(3) 0.039(2) -0.029(2) 0.017(2) -0.025(2) 
C29 0.018(2) 0.0140(17) 0.0174(19) 0.0027(14) -0.0002(16) -0.0046(16) 
C30 0.029(3) 0.049(3) 0.046(3) -0.035(2) 0.014(2) -0.016(2) 
C31 0.015(2) 0.041(3) 0.057(3) -0.028(2) 0.011(2) -0.008(2) 
C32 0.027(2) 0.023(2) 0.027(2) -0.0032(17) -0.0065(18) -0.0082(18) 
Ir2 0.01062(8) 0.01108(7) 0.01403(8) -0.00198(6) -0.00187(6) -0.00059(6) 
Cl2 0.0129(5) 0.0188(4) 0.0185(4) 0.0000(3) 0.0005(4) -0.0008(4) 
O3 0.0196(15) 0.0264(14) 0.0161(13) -0.0037(11) 0.0022(11) -0.0097(12) 
O4 0.0236(15) 0.0151(12) 0.0144(12) -0.0046(10) -0.0013(11) -0.0055(11) 
N4 0.0123(16) 0.0149(15) 0.0159(15) -0.0005(12) 0.0004(13) -0.0037(13) 
N5 0.0124(16) 0.0140(14) 0.0142(15) -0.0026(12) -0.0043(12) 0.0014(13) 
N6 0.0089(15) 0.0127(14) 0.0167(15) -0.0030(12) -0.0015(12) -0.0001(13) 
C33 0.015(2) 0.0125(17) 0.024(2) -0.0011(15) -0.0006(16) -0.0057(16) 
C34 0.027(2) 0.031(2) 0.029(2) -0.0151(18) 0.0045(18) -0.0128(19) 
C35 0.025(2) 0.047(3) 0.045(3) -0.022(2) -0.002(2) -0.021(2) 
C36 0.019(2) 0.044(3) 0.050(3) -0.018(2) 0.007(2) -0.017(2) 
C37 0.027(2) 0.029(2) 0.028(2) -0.0097(18) 0.0098(18) -0.017(2) 
C38 0.020(2) 0.0167(18) 0.021(2) -0.0009(15) -0.0055(16) -0.0079(17) 
C39 0.016(2) 0.0113(17) 0.0145(18) 0.0018(14) -0.0024(15) 0.0004(15) 
C40 0.016(2) 0.0121(17) 0.0193(19) -0.0018(14) -0.0037(15) -0.0019(15) 
C41 0.022(2) 0.0209(19) 0.0157(19) -0.0025(15) -0.0040(16) -0.0040(17) 
C42 0.030(2) 0.025(2) 0.019(2) -0.0050(16) -0.0135(17) -0.0075(19) 
C43 0.020(2) 0.0170(19) 0.037(2) -0.0054(17) -0.0112(18) -0.0038(17) 
C44 0.016(2) 0.0134(17) 0.022(2) -0.0027(15) -0.0014(16) -0.0011(16) 
C45 0.017(2) 0.0088(16) 0.0148(18) 0.0014(13) -0.0058(15) 0.0006(15) 
C46 0.0135(19) 0.0188(18) 0.0118(18) -0.0038(14) 0.0003(15) -0.0035(16) 
C47 0.015(2) 0.0205(19) 0.0203(19) -0.0032(15) -0.0010(16) -0.0045(16) 
C48 0.020(2) 0.025(2) 0.0159(19) 0.0027(16) -0.0082(16) -0.0041(17) 
C49 0.023(2) 0.035(2) 0.0168(19) -0.0035(17) -0.0054(17) -0.0133(19) 
C50 0.025(2) 0.026(2) 0.0141(19) -0.0060(16) 0.0028(16) -0.0122(18) 
C51 0.0132(19) 0.0204(18) 0.0088(17) 0.0003(14) 0.0022(15) -0.0040(16) 
C52 0.0111(19) 0.0155(17) 0.0149(18) -0.0048(14) 0.0033(15) -0.0033(15) 
C53 0.0086(18) 0.0149(17) 0.0136(17) -0.0007(14) 0.0003(14) -0.0007(15) 
C54 0.0133(19) 0.0158(17) 0.0163(18) -0.0046(14) 0.0058(15) -0.0029(15) 
C55 0.0121(19) 0.0094(16) 0.025(2) 0.0026(15) 0.0028(16) 0.0000(15) 
C56 0.0108(19) 0.0190(18) 0.022(2) 0.0052(15) -0.0018(15) -0.0056(16) 
C57 0.0072(13) 0.0174(12) 0.0195(13) 0.0001(10) 0.0007(10) -0.0066(11) 
C58 0.0072(13) 0.0174(12) 0.0195(13) 0.0001(10) 0.0007(10) -0.0066(11) 
C59 0.024(2) 0.0202(19) 0.022(2) -0.0009(16) 0.0079(18) 0.0040(18) 
C60 0.026(2) 0.0191(19) 0.023(2) -0.0037(16) 0.0085(18) 0.0063(18) 
C61 0.015(2) 0.0126(17) 0.025(2) -0.0039(15) -0.0022(16) -0.0026(16) 
C62 0.027(2) 0.0172(19) 0.021(2) 0.0019(16) 0.0023(18) -0.0033(18) 
C63 0.025(2) 0.0170(18) 0.019(2) -0.0053(15) 0.0050(17) 0.0009(17) 
C64 0.023(2) 0.0142(18) 0.036(2) -0.0009(17) -0.0031(19) 0.0044(17) 
  
_geom_special_details 
; 
 All esds (except the esd in the dihedral angle between two l.s. planes) 
 are estimated using the full covariance matrix.  The cell esds are taken 
 into account individually in the estimation of esds in distances, angles 
 and torsion angles; correlations between esds in cell parameters are only 
 used when they are defined by crystal symmetry.  An approximate (isotropic) 
 treatment of cell esds is used for estimating esds involving l.s. planes. 
; 
  
loop_ 
_geom_bond_atom_site_label_1 
_geom_bond_atom_site_label_2 
_geom_bond_distance 
_geom_bond_site_symmetry_2 
_geom_bond_publ_flag 
Ir1 C26 2.026(3) . ? 
Ir1 C13 2.020(3) . ? 
Ir1 N2 2.046(3) . ? 
Ir1 N1 2.174(3) . ? 
Ir1 N3 2.187(3) . ? 
Ir1 Cl1 2.3586(8) . ? 
O1 C7 1.358(4) . ? 
O1 C6 1.377(4) . ? 
O2 C20 1.358(4) . ? 
O2 C19 1.381(4) . ? 
N1 C7 1.301(4) . ? 
N1 C1 1.407(4) . ? 
N2 C20 1.315(4) . ? 
N2 C14 1.404(4) . ? 
N3 C27 1.336(4) . ? 
N3 C31 1.329(4) . ? 
C1 C6 1.385(4) . ? 
C1 C2 1.373(5) . ? 
C2 C3 1.373(5) . ? 
C2 H2A 0.9500 . ? 
C3 C4 1.391(5) . ? 
C3 H3A 0.9500 . ? 
C4 C5 1.390(5) . ? 
C4 H4A 0.9500 . ? 
C5 C6 1.359(5) . ? 
C5 H5A 0.9500 . ? 
C7 C8 1.439(5) . ? 
C8 C9 1.401(4) . ? 
C8 C13 1.409(4) . ? 
C9 C10 1.365(5) . ? 
C9 H9A 0.9500 . ? 
C10 C11 1.383(5) . ? 
C10 H10A 0.9500 . ? 
C11 C12 1.382(4) . ? 
C11 H11A 0.9500 . ? 
C12 C13 1.404(5) . ? 
C12 H12A 0.9500 . ? 
C14 C19 1.386(4) . ? 
C14 C15 1.387(5) . ? 
C15 C16 1.369(5) . ? 
C15 H15A 0.9500 . ? 
C16 C17 1.400(5) . ? 
C16 H16A 0.9500 . ? 
C17 C18 1.379(5) . ? 
C17 H17A 0.9500 . ? 
C18 C19 1.371(5) . ? 
C18 H18A 0.9500 . ? 
C20 C21 1.414(4) . ? 
C21 C26 1.418(4) . ? 
C21 C22 1.398(4) . ? 
C22 C23 1.373(5) . ? 
C22 H22A 0.9500 . ? 
C23 C24 1.382(5) . ? 
C23 H23A 0.9500 . ? 
C24 C25 1.386(4) . ? 
C24 H24A 0.9500 . ? 
C25 C26 1.392(5) . ? 
C25 H25A 0.9500 . ? 
C27 C28 1.376(5) . ? 
C27 H27A 0.9500 . ? 
C28 C29 1.378(5) . ? 
C28 H28A 0.9500 . ? 
C29 C30 1.354(5) . ? 
C29 C32 1.504(5) . ? 
C30 C31 1.380(5) . ? 
C30 H30A 0.9500 . ? 
C31 H31A 0.9500 . ? 
C32 H32A 0.9800 . ? 
C32 H32B 0.9800 . ? 
C32 H32C 0.9800 . ? 
Ir2 C58 2.012(3) . ? 
Ir2 C45 2.014(3) . ? 
Ir2 N4 2.031(3) . ? 
Ir2 N5 2.172(3) . ? 
Ir2 N6 2.196(3) . ? 
Ir2 Cl2 2.3609(8) . ? 
O3 C39 1.343(4) . ? 
O3 C38 1.393(4) . ? 
O4 C52 1.347(4) . ? 
O4 C51 1.383(4) . ? 
N4 C39 1.314(4) . ? 
N4 C33 1.392(4) . ? 
N5 C52 1.309(4) . ? 
N5 C46 1.392(4) . ? 
N6 C59 1.329(4) . ? 
N6 C63 1.354(4) . ? 
C33 C34 1.369(5) . ? 
C33 C38 1.397(5) . ? 
C34 C35 1.391(5) . ? 
C34 H34A 0.9500 . ? 
C35 C36 1.402(5) . ? 
C35 H35A 0.9500 . ? 
C36 C37 1.370(5) . ? 
C36 H36A 0.9500 . ? 
C37 C38 1.363(5) . ? 
C37 H37A 0.9500 . ? 
C39 C40 1.436(5) . ? 
C40 C41 1.391(5) . ? 
C40 C45 1.409(4) . ? 
C41 C42 1.368(5) . ? 
C41 H41A 0.9500 . ? 
C42 C43 1.398(5) . ? 
C42 H42A 0.9500 . ? 
C43 C44 1.386(5) . ? 
C43 H43A 0.9500 . ? 
C44 C45 1.402(5) . ? 
C44 H44A 0.9500 . ? 
C46 C51 1.379(4) . ? 
C46 C47 1.387(5) . ? 
C47 C48 1.384(5) . ? 
C47 H47A 0.9500 . ? 
C48 C49 1.386(5) . ? 
C48 H48A 0.9500 . ? 
C49 C50 1.374(5) . ? 
C49 H49A 0.9500 . ? 
C50 C51 1.379(5) . ? 
C50 H50A 0.9500 . ? 
C52 C53 1.447(5) . ? 
C53 C54 1.390(4) . ? 
C53 C58 1.403(5) . ? 
C54 C55 1.375(5) . ? 
C54 H54A 0.9500 . ? 
C55 C56 1.385(5) . ? 
C55 H55A 0.9500 . ? 
C56 C57 1.392(4) . ? 
C56 H56A 0.9500 . ? 
C57 C58 1.417(5) . ? 
C57 H57A 0.9500 . ? 
C59 C60 1.363(5) . ? 
C59 H59A 0.9500 . ? 
C60 C61 1.367(5) . ? 
C60 H60A 0.9500 . ? 
C61 C62 1.391(5) . ? 
C61 C64 1.500(4) . ? 
C62 C63 1.364(5) . ? 
C62 H62A 0.9500 . ? 
C63 H63A 0.9500 . ? 
C64 H64A 0.9800 . ? 
C64 H64B 0.9800 . ? 
C64 H64C 0.9800 . ? 
  
loop_ 
_geom_angle_atom_site_label_1 
_geom_angle_atom_site_label_2 
_geom_angle_atom_site_label_3 
_geom_angle 
_geom_angle_site_symmetry_1 
_geom_angle_site_symmetry_3 
_geom_angle_publ_flag 
C26 Ir1 C13 92.48(13) . . ? 
C26 Ir1 N2 79.76(12) . . ? 
C13 Ir1 N2 93.36(11) . . ? 
C26 Ir1 N1 172.13(11) . . ? 
C13 Ir1 N1 79.82(12) . . ? 
N2 Ir1 N1 98.91(10) . . ? 
C26 Ir1 N3 94.43(11) . . ? 
C13 Ir1 N3 173.03(11) . . ? 
N2 Ir1 N3 88.71(10) . . ? 
N1 Ir1 N3 93.29(10) . . ? 
C26 Ir1 Cl1 94.56(10) . . ? 
C13 Ir1 Cl1 87.08(9) . . ? 
N2 Ir1 Cl1 174.31(8) . . ? 
N1 Ir1 Cl1 86.75(7) . . ? 
N3 Ir1 Cl1 91.53(7) . . ? 
C7 O1 C6 104.0(2) . . ? 
C20 O2 C19 104.8(2) . . ? 
C7 N1 C1 105.2(3) . . ? 
C7 N1 Ir1 109.5(2) . . ? 
C1 N1 Ir1 145.1(2) . . ? 
C20 N2 C14 106.5(3) . . ? 
C20 N2 Ir1 113.1(2) . . ? 
C14 N2 Ir1 140.1(2) . . ? 
C27 N3 C31 115.3(3) . . ? 
C27 N3 Ir1 122.9(2) . . ? 
C31 N3 Ir1 121.5(2) . . ? 
C6 C1 C2 119.4(3) . . ? 
C6 C1 N1 107.1(3) . . ? 
C2 C1 N1 133.5(3) . . ? 
C3 C2 C1 117.3(3) . . ? 
C3 C2 H2A 121.3 . . ? 
C1 C2 H2A 121.3 . . ? 
C2 C3 C4 122.1(3) . . ? 
C2 C3 H3A 118.9 . . ? 
C4 C3 H3A 118.9 . . ? 
C3 C4 C5 121.0(3) . . ? 
C3 C4 H4A 119.5 . . ? 
C5 C4 H4A 119.5 . . ? 
C6 C5 C4 115.2(3) . . ? 
C6 C5 H5A 122.4 . . ? 
C4 C5 H5A 122.4 . . ? 
C5 C6 O1 126.3(3) . . ? 
C5 C6 C1 124.9(3) . . ? 
O1 C6 C1 108.8(3) . . ? 
N1 C7 O1 115.0(3) . . ? 
N1 C7 C8 122.0(3) . . ? 
O1 C7 C8 123.0(3) . . ? 
C9 C8 C13 124.1(3) . . ? 
C9 C8 C7 122.7(3) . . ? 
C13 C8 C7 113.3(3) . . ? 
C8 C9 C10 118.8(3) . . ? 
C8 C9 H9A 120.6 . . ? 
C10 C9 H9A 120.6 . . ? 
C11 C10 C9 119.4(3) . . ? 
C11 C10 H10A 120.3 . . ? 
C9 C10 H10A 120.3 . . ? 
C10 C11 C12 121.4(3) . . ? 
C10 C11 H11A 119.3 . . ? 
C12 C11 H11A 119.3 . . ? 
C11 C12 C13 122.1(3) . . ? 
C11 C12 H12A 119.0 . . ? 
C13 C12 H12A 119.0 . . ? 
C8 C13 C12 114.3(3) . . ? 
C8 C13 Ir1 115.1(2) . . ? 
C12 C13 Ir1 130.5(2) . . ? 
C19 C14 C15 120.6(3) . . ? 
C19 C14 N2 106.4(3) . . ? 
C15 C14 N2 133.0(3) . . ? 
C16 C15 C14 116.6(3) . . ? 
C16 C15 H15A 121.7 . . ? 
C14 C15 H15A 121.7 . . ? 
C15 C16 C17 122.0(3) . . ? 
C15 C16 H16A 119.0 . . ? 
C17 C16 H16A 119.0 . . ? 
C16 C17 C18 121.8(3) . . ? 
C16 C17 H17A 119.1 . . ? 
C18 C17 H17A 119.1 . . ? 
C19 C18 C17 115.4(3) . . ? 
C19 C18 H18A 122.3 . . ? 
C17 C18 H18A 122.3 . . ? 
C14 C19 O2 109.0(3) . . ? 
C14 C19 C18 123.7(3) . . ? 
O2 C19 C18 127.3(3) . . ? 
N2 C20 O2 113.3(3) . . ? 
N2 C20 C21 120.6(3) . . ? 
O2 C20 C21 126.1(3) . . ? 
C20 C21 C26 111.5(3) . . ? 
C20 C21 C22 125.6(3) . . ? 
C26 C21 C22 122.9(3) . . ? 
C23 C22 C21 118.7(3) . . ? 
C23 C22 H22A 120.7 . . ? 
C21 C22 H22A 120.7 . . ? 
C22 C23 C24 120.0(3) . . ? 
C22 C23 H23A 120.0 . . ? 
C24 C23 H23A 120.0 . . ? 
C25 C24 C23 121.2(3) . . ? 
C25 C24 H24A 119.4 . . ? 
C23 C24 H24A 119.4 . . ? 
C24 C25 C26 121.3(3) . . ? 
C24 C25 H25A 119.3 . . ? 
C26 C25 H25A 119.3 . . ? 
C21 C26 C25 115.9(3) . . ? 
C21 C26 Ir1 114.8(2) . . ? 
C25 C26 Ir1 129.2(2) . . ? 
N3 C27 C28 123.5(4) . . ? 
N3 C27 H27A 118.3 . . ? 
C28 C27 H27A 118.3 . . ? 
C27 C28 C29 120.8(4) . . ? 
C27 C28 H28A 119.6 . . ? 
C29 C28 H28A 119.6 . . ? 
C30 C29 C28 115.3(4) . . ? 
C30 C29 C32 122.6(3) . . ? 
C28 C29 C32 122.1(3) . . ? 
C29 C30 C31 121.5(4) . . ? 
C29 C30 H30A 119.2 . . ? 
C31 C30 H30A 119.2 . . ? 
N3 C31 C30 123.4(4) . . ? 
N3 C31 H31A 118.3 . . ? 
C30 C31 H31A 118.3 . . ? 
C29 C32 H32A 109.5 . . ? 
C29 C32 H32B 109.5 . . ? 
H32A C32 H32B 109.5 . . ? 
C29 C32 H32C 109.5 . . ? 
H32A C32 H32C 109.5 . . ? 
H32B C32 H32C 109.5 . . ? 
C58 Ir2 C45 92.18(13) . . ? 
C58 Ir2 N4 91.70(12) . . ? 
C45 Ir2 N4 80.12(12) . . ? 
C58 Ir2 N5 79.28(12) . . ? 
C45 Ir2 N5 170.46(11) . . ? 
N4 Ir2 N5 95.78(11) . . ? 
C58 Ir2 N6 176.79(12) . . ? 
C45 Ir2 N6 91.00(11) . . ? 
N4 Ir2 N6 89.31(10) . . ? 
N5 Ir2 N6 97.59(10) . . ? 
C58 Ir2 Cl2 88.93(9) . . ? 
C45 Ir2 Cl2 95.59(10) . . ? 
N4 Ir2 Cl2 175.68(8) . . ? 
N5 Ir2 Cl2 88.54(7) . . ? 
N6 Ir2 Cl2 90.30(7) . . ? 
C39 O3 C38 104.9(3) . . ? 
C52 O4 C51 104.5(2) . . ? 
C39 N4 C33 106.1(3) . . ? 
C39 N4 Ir2 113.8(2) . . ? 
C33 N4 Ir2 139.8(2) . . ? 
C52 N5 C46 105.2(3) . . ? 
C52 N5 Ir2 109.9(2) . . ? 
C46 N5 Ir2 144.7(2) . . ? 
C59 N6 C63 116.0(3) . . ? 
C59 N6 Ir2 122.1(2) . . ? 
C63 N6 Ir2 121.9(2) . . ? 
C34 C33 C38 119.4(3) . . ? 
C34 C33 N4 133.4(3) . . ? 
C38 C33 N4 107.2(3) . . ? 
C33 C34 C35 117.0(3) . . ? 
C33 C34 H34A 121.5 . . ? 
C35 C34 H34A 121.5 . . ? 
C34 C35 C36 121.5(4) . . ? 
C34 C35 H35A 119.3 . . ? 
C36 C35 H35A 119.3 . . ? 
C37 C36 C35 122.1(4) . . ? 
C37 C36 H36A 119.0 . . ? 
C35 C36 H36A 119.0 . . ? 
C38 C37 C36 114.9(3) . . ? 
C38 C37 H37A 122.6 . . ? 
C36 C37 H37A 122.6 . . ? 
C37 C38 O3 127.2(3) . . ? 
C37 C38 C33 125.1(3) . . ? 
O3 C38 C33 107.7(3) . . ? 
N4 C39 O3 114.2(3) . . ? 
N4 C39 C40 119.5(3) . . ? 
O3 C39 C40 126.3(3) . . ? 
C41 C40 C45 124.2(3) . . ? 
C41 C40 C39 124.4(3) . . ? 
C45 C40 C39 111.4(3) . . ? 
C42 C41 C40 118.9(3) . . ? 
C42 C41 H41A 120.6 . . ? 
C40 C41 H41A 120.6 . . ? 
C41 C42 C43 118.8(3) . . ? 
C41 C42 H42A 120.6 . . ? 
C43 C42 H42A 120.6 . . ? 
C44 C43 C42 122.2(3) . . ? 
C44 C43 H43A 118.9 . . ? 
C42 C43 H43A 118.9 . . ? 
C43 C44 C45 120.6(3) . . ? 
C43 C44 H44A 119.7 . . ? 
C45 C44 H44A 119.7 . . ? 
C44 C45 C40 115.4(3) . . ? 
C44 C45 Ir2 129.4(3) . . ? 
C40 C45 Ir2 115.1(2) . . ? 
C51 C46 N5 107.8(3) . . ? 
C51 C46 C47 119.8(3) . . ? 
N5 C46 C47 132.3(3) . . ? 
C48 C47 C46 116.7(3) . . ? 
C48 C47 H47A 121.6 . . ? 
C46 C47 H47A 121.6 . . ? 
C47 C48 C49 121.8(3) . . ? 
C47 C48 H48A 119.1 . . ? 
C49 C48 H48A 119.1 . . ? 
C50 C49 C48 122.4(3) . . ? 
C50 C49 H49A 118.8 . . ? 
C48 C49 H49A 118.8 . . ? 
C49 C50 C51 114.8(3) . . ? 
C49 C50 H50A 122.6 . . ? 
C51 C50 H50A 122.6 . . ? 
C46 C51 C50 124.5(3) . . ? 
C46 C51 O4 108.0(3) . . ? 
C50 C51 O4 127.4(3) . . ? 
N5 C52 O4 114.4(3) . . ? 
N5 C52 C53 121.8(3) . . ? 
O4 C52 C53 123.6(3) . . ? 
C54 C53 C58 124.6(3) . . ? 
C54 C53 C52 123.3(3) . . ? 
C58 C53 C52 112.1(3) . . ? 
C55 C54 C53 118.5(3) . . ? 
C55 C54 H54A 120.7 . . ? 
C53 C54 H54A 120.7 . . ? 
C54 C55 C56 119.9(3) . . ? 
C54 C55 H55A 120.0 . . ? 
C56 C55 H55A 120.0 . . ? 
C57 C56 C55 120.9(3) . . ? 
C57 C56 H56A 119.6 . . ? 
C55 C56 H56A 119.6 . . ? 
C56 C57 C58 121.5(3) . . ? 
C56 C57 H57A 119.2 . . ? 
C58 C57 H57A 119.2 . . ? 
C53 C58 C57 114.5(3) . . ? 
C53 C58 Ir2 116.8(2) . . ? 
C57 C58 Ir2 128.6(3) . . ? 
N6 C59 C60 123.6(3) . . ? 
N6 C59 H59A 118.2 . . ? 
C60 C59 H59A 118.2 . . ? 
C61 C60 C59 121.2(3) . . ? 
C61 C60 H60A 119.4 . . ? 
C59 C60 H60A 119.4 . . ? 
C60 C61 C62 115.6(3) . . ? 
C60 C61 C64 122.7(3) . . ? 
C62 C61 C64 121.8(3) . . ? 
C63 C62 C61 120.8(3) . . ? 
C63 C62 H62A 119.6 . . ? 
C61 C62 H62A 119.6 . . ? 
N6 C63 C62 122.7(3) . . ? 
N6 C63 H63A 118.7 . . ? 
C62 C63 H63A 118.7 . . ? 
C61 C64 H64A 109.5 . . ? 
C61 C64 H64B 109.5 . . ? 
H64A C64 H64B 109.5 . . ? 
C61 C64 H64C 109.5 . . ? 
H64A C64 H64C 109.5 . . ? 
H64B C64 H64C 109.5 . . ? 
  
_diffrn_measured_fraction_theta_max 0.849 
_diffrn_reflns_theta_full        26.00 
_diffrn_measured_fraction_theta_full 0.998 
_refine_diff_density_max         1.216 
_refine_diff_density_min         -0.987 
_refine_diff_density_rms         0.115 
  
loop_ 
  _platon_squeeze_void_nr 
  _platon_squeeze_void_average_x 
  _platon_squeeze_void_average_y 
  _platon_squeeze_void_average_z 
  _platon_squeeze_void_volume 
  _platon_squeeze_void_count_electrons 
  _platon_squeeze_void_content 
   1  0.000  0.000  0.000       211        41 ' ' 
_platon_squeeze_details 
; 
; 
