# Supplementary material
Source: MDPI journal article supplement (https://www.mdpi.com/2304-6740/6/4/118)
Supplement: s1 [file s1 › inorganics-371116-supplementary/4. pya.cif]

 
data_pya 
  
_audit_creation_method           SHELXL-97 
_chemical_name_systematic        ? 
_chemical_name_common            ? 
_chemical_formula_moiety         '2(C31 H17 Cl F4 Ir N3 O2), C H2 Cl2 ' 
_chemical_formula_sum            'C63 H36 Cl4 F8 Ir2 N6 O4' 
_chemical_melting_point          ? 
  
_exptl_crystal_description       parallelepiped 
_exptl_crystal_colour            yellow 
  
_diffrn_ambient_temperature      110(2) 
_chemical_formula_weight         1619.18 
  
loop_ 
_atom_type_symbol 
_atom_type_description 
_atom_type_scat_dispersion_real 
_atom_type_scat_dispersion_imag 
_atom_type_scat_source 
C C 0.0033 0.0016 'International Tables Vol C Tables 4.2.6.8 and 6.1.1.4' 
H H 0.0000 0.0000 'International Tables Vol C Tables 4.2.6.8 and 6.1.1.4' 
N N 0.0061 0.0033 'International Tables Vol C Tables 4.2.6.8 and 6.1.1.4' 
O O 0.0106 0.0060 'International Tables Vol C Tables 4.2.6.8 and 6.1.1.4' 
F F 0.0171 0.0103 'International Tables Vol C Tables 4.2.6.8 and 6.1.1.4' 
Cl Cl 0.1484 0.1585 'International Tables Vol C Tables 4.2.6.8 and 6.1.1.4' 
Ir Ir -1.4442 7.9887 'International Tables Vol C Tables 4.2.6.8 and 6.1.1.4' 
  
_symmetry_cell_setting           monoclinic 
_symmetry_space_group_name_H-M   'P 21/n' 
_symmetry_int_tables_number      14 
_chemical_absolute_configuration ? 
  
loop_ 
_symmetry_equiv_pos_as_xyz 
'x, y, z' 
'-x+1/2, y+1/2, -z+1/2' 
'-x, -y, -z' 
'x-1/2, -y-1/2, z-1/2' 
  
_cell_length_a                   9.7170(2) 
_cell_length_b                   17.9672(4) 
_cell_length_c                   16.2161(3) 
_cell_angle_alpha                90.00 
_cell_angle_beta                 94.710(2) 
_cell_angle_gamma                90.00 
_cell_volume                     2821.56(10) 
_cell_formula_units_Z            2 
_cell_measurement_temperature    110(2) 
_cell_measurement_reflns_used    8533 
_cell_measurement_theta_min      2.7583 
_cell_measurement_theta_max      29.1524 
_exptl_crystal_size_max          0.58 
_exptl_crystal_size_mid          0.42 
_exptl_crystal_size_min          0.28 
_exptl_crystal_density_meas      ? 
_exptl_crystal_density_diffrn    1.906 
_exptl_crystal_density_method    'not measured' 
_exptl_crystal_F_000             1564 
_exptl_absorpt_coefficient_mu    4.984 
_exptl_absorpt_correction_type   multi-scan 
_exptl_absorpt_correction_T_min  0.81820 
_exptl_absorpt_correction_T_max  1.00000 
_exptl_absorpt_process_details 
; 
CrysAlisPro, Oxford Diffraction Ltd., 
Version 1.171.33.66 (release 28-04-2010 CrysAlis171 .NET) 
(compiled Apr 28 2010,14:27:37) 
Empirical absorption correction using spherical harmonics, 
 implemented in SCALE3 ABSPACK scaling algorithm. 
; 
  
_exptl_special_details 
; 
 ? 
; 
_diffrn_radiation_probe          x-ray 
_diffrn_radiation_type           MoK\a 
_diffrn_radiation_wavelength     0.71073 
_diffrn_source                   'fine-focus sealed tube' 
_diffrn_radiation_monochromator  graphite 
_diffrn_measurement_device_type  'CCD detector' 
_diffrn_measurement_method       '\w scans' 
_diffrn_detector_area_resol_mean ? 
_diffrn_reflns_number            13859 
_diffrn_reflns_av_R_equivalents  0.0261 
_diffrn_reflns_av_sigmaI/netI    0.0461 
_diffrn_reflns_limit_h_min       -12 
_diffrn_reflns_limit_h_max       11 
_diffrn_reflns_limit_k_min       -24 
_diffrn_reflns_limit_k_max       22 
_diffrn_reflns_limit_l_min       -21 
_diffrn_reflns_limit_l_max       21 
_diffrn_reflns_theta_min         2.76 
_diffrn_reflns_theta_max         29.22 
_reflns_number_total             6574 
_reflns_number_gt                5226 
_reflns_threshold_expression     >2sigma(I) 
  
_computing_data_collection 
; 
CrysAlis CCD, Oxford Diffraction Ltd., 
Version 1.171.32.29 (release 10-06-2008 CrysAlis171 .NET) 
(compiled Jun 10 2008,16:49:55) 
; 
_computing_cell_refinement 
; 
CrysAlis RED, Oxford Diffraction Ltd., 
Version 1.171.32.29 (release 10-06-2008 CrysAlis171 .NET) 
(compiled Jun 10 2008,16:49:55) 
; 
_computing_data_reduction 
; 
CrysAlis RED, Oxford Diffraction Ltd., 
Version 1.171.32.29 (release 10-06-2008 CrysAlis171 .NET) 
(compiled Jun 10 2008,16:49:55) 
; 
_computing_structure_solution    'SHELXS-97 (Sheldrick, 2008)' 
_computing_structure_refinement  'SHELXL-97 (Sheldrick, 2008)' 
_computing_molecular_graphics    'Bruker SHELXTL' 
_computing_publication_material  'Bruker SHELXTL' 
  
_refine_special_details 
; 
 Refinement of F^2^ against ALL reflections.  The weighted R-factor wR and 
 goodness of fit S are based on F^2^, conventional R-factors R are based 
 on F, with F set to zero for negative F^2^. The threshold expression of 
 F^2^ > 2sigma(F^2^) is used only for calculating R-factors(gt) etc. and is 
 not relevant to the choice of reflections for refinement.  R-factors based 
 on F^2^ are statistically about twice as large as those based on F, and R- 
 factors based on ALL data will be even larger. 
; 
  
_refine_ls_structure_factor_coef Fsqd 
_refine_ls_matrix_type           full 
_refine_ls_weighting_scheme      calc 
_refine_ls_weighting_details 
'calc w=1/[\s^2^(Fo^2^)+(0.0251P)^2^+0.0000P] where P=(Fo^2^+2Fc^2^)/3' 
_atom_sites_solution_primary     direct 
_atom_sites_solution_secondary   difmap 
_atom_sites_solution_hydrogens   geom 
_refine_ls_hydrogen_treatment    mixed 
_refine_ls_extinction_method     none 
_refine_ls_extinction_coef       ? 
_refine_ls_number_reflns         6574 
_refine_ls_number_parameters     412 
_refine_ls_number_restraints     0 
_refine_ls_R_factor_all          0.0368 
_refine_ls_R_factor_gt           0.0254 
_refine_ls_wR_factor_ref         0.0519 
_refine_ls_wR_factor_gt          0.0505 
_refine_ls_goodness_of_fit_ref   0.953 
_refine_ls_restrained_S_all      0.953 
_refine_ls_shift/su_max          0.002 
_refine_ls_shift/su_mean         0.000 
  
loop_ 
_atom_site_label 
_atom_site_type_symbol 
_atom_site_fract_x 
_atom_site_fract_y 
_atom_site_fract_z 
_atom_site_U_iso_or_equiv 
_atom_site_adp_type 
_atom_site_occupancy 
_atom_site_symmetry_multiplicity 
_atom_site_calc_flag 
_atom_site_refinement_flags 
_atom_site_disorder_assembly 
_atom_site_disorder_group 
Ir Ir 1.609844(14) -0.266511(8) -0.475276(7) 0.01159(4) Uani 1 1 d . . . 
Cl1 Cl 1.70370(9) -0.20462(5) -0.59226(4) 0.01714(17) Uani 1 1 d . . . 
F1 F 1.3874(2) -0.47198(12) -0.20938(11) 0.0331(6) Uani 1 1 d . . . 
F2 F 1.3932(2) -0.23300(11) -0.32340(11) 0.0209(4) Uani 1 1 d . . . 
F3 F 1.0287(2) -0.26804(13) -0.66084(12) 0.0310(5) Uani 1 1 d . . . 
F4 F 1.4459(2) -0.39292(12) -0.60075(11) 0.0286(5) Uani 1 1 d . . . 
O1 O 1.7060(3) -0.48847(14) -0.45484(12) 0.0221(6) Uani 1 1 d . . . 
O2 O 1.3438(2) -0.08869(13) -0.46993(12) 0.0177(5) Uani 1 1 d . . . 
N1 N 1.6804(3) -0.37092(15) -0.49825(14) 0.0125(6) Uani 1 1 d . . . 
N2 N 1.5251(3) -0.16532(15) -0.45049(14) 0.0118(6) Uani 1 1 d . . . 
N3 N 1.8048(3) -0.25592(15) -0.40218(15) 0.0150(6) Uani 1 1 d . . . 
C1 C 1.7606(4) -0.4090(2) -0.55455(18) 0.0158(7) Uani 1 1 d . . . 
C2 C 1.8159(4) -0.3876(2) -0.62669(19) 0.0200(8) Uani 1 1 d . . . 
H2A H 1.8060 -0.3384 -0.6477 0.024 Uiso 1 1 calc R . . 
C3 C 1.8864(4) -0.4418(2) -0.6667(2) 0.0268(9) Uani 1 1 d . . . 
H3A H 1.9258 -0.4293 -0.7165 0.032 Uiso 1 1 calc R . . 
C4 C 1.9017(4) -0.5139(2) -0.6365(2) 0.0273(9) Uani 1 1 d . . . 
H4A H 1.9523 -0.5489 -0.6658 0.033 Uiso 1 1 calc R . . 
C5 C 1.8453(4) -0.5359(2) -0.5651(2) 0.0287(9) Uani 1 1 d . . . 
H5A H 1.8539 -0.5852 -0.5440 0.034 Uiso 1 1 calc R . . 
C6 C 1.7760(4) -0.4810(2) -0.52693(19) 0.0208(8) Uani 1 1 d . . . 
C7 C 1.6536(4) -0.4204(2) -0.44375(18) 0.0166(7) Uani 1 1 d . . . 
C8 C 1.5664(4) -0.4009(2) -0.37882(18) 0.0151(7) Uani 1 1 d . . . 
C9 C 1.5209(4) -0.4515(2) -0.32146(18) 0.0195(8) Uani 1 1 d . . . 
H9A H 1.5488 -0.5022 -0.3210 0.023 Uiso 1 1 calc R . . 
C10 C 1.4348(4) -0.4247(2) -0.26632(18) 0.0204(8) Uani 1 1 d . . . 
C11 C 1.3914(4) -0.3520(2) -0.26580(18) 0.0181(8) Uani 1 1 d . . . 
H11A H 1.3313 -0.3347 -0.2266 0.022 Uiso 1 1 calc R . . 
C12 C 1.4393(3) -0.3049(2) -0.32499(17) 0.0157(7) Uani 1 1 d . . . 
C13 C 1.5278(3) -0.32497(19) -0.38319(16) 0.0112(7) Uani 1 1 d . . . 
C14 C 1.5581(4) -0.09932(19) -0.40670(17) 0.0150(7) Uani 1 1 d . . . 
C15 C 1.6761(4) -0.0756(2) -0.36001(18) 0.0205(8) Uani 1 1 d . . . 
H15A H 1.7554 -0.1063 -0.3508 0.025 Uiso 1 1 calc R . . 
C16 C 1.6712(4) -0.0040(2) -0.3276(2) 0.0255(9) Uani 1 1 d . . . 
H16A H 1.7496 0.0144 -0.2950 0.031 Uiso 1 1 calc R . . 
C17 C 1.5556(4) 0.0415(2) -0.34111(19) 0.0237(9) Uani 1 1 d . . . 
H17A H 1.5575 0.0899 -0.3175 0.028 Uiso 1 1 calc R . . 
C18 C 1.4386(4) 0.0182(2) -0.38782(18) 0.0216(8) Uani 1 1 d . . . 
H18A H 1.3592 0.0488 -0.3975 0.026 Uiso 1 1 calc R . . 
C19 C 1.4453(4) -0.05233(19) -0.41919(18) 0.0162(7) Uani 1 1 d . . . 
C20 C 1.4011(3) -0.15505(19) -0.48558(17) 0.0142(7) Uani 1 1 d . . . 
C21 C 1.3358(4) -0.2128(2) -0.53660(17) 0.0152(7) Uani 1 1 d . . . 
C22 C 1.2037(4) -0.2069(2) -0.57660(19) 0.0205(8) Uani 1 1 d . . . 
H22A H 1.1491 -0.1633 -0.5735 0.025 Uiso 1 1 calc R . . 
C23 C 1.1571(4) -0.2695(2) -0.62138(18) 0.0197(8) Uani 1 1 d . . . 
C24 C 1.2364(4) -0.3321(2) -0.62817(18) 0.0212(8) Uani 1 1 d . . . 
H24A H 1.2018 -0.3741 -0.6589 0.025 Uiso 1 1 calc R . . 
C25 C 1.3672(4) -0.3322(2) -0.58914(18) 0.0176(8) Uani 1 1 d . . . 
C26 C 1.4245(3) -0.27499(19) -0.54077(17) 0.0146(7) Uani 1 1 d . . . 
C27 C 1.8118(4) -0.2576(2) -0.31853(18) 0.0195(8) Uani 1 1 d . . . 
H27A H 1.7281 -0.2584 -0.2921 0.023 Uiso 1 1 calc R . . 
C28 C 1.9339(4) -0.2580(2) -0.2703(2) 0.0216(8) Uani 1 1 d . . . 
H28A H 1.9339 -0.2586 -0.2117 0.026 Uiso 1 1 calc R . . 
C29 C 2.0557(4) -0.2575(2) -0.3063(2) 0.0285(10) Uani 1 1 d . . . 
H29A H 2.1414 -0.2567 -0.2737 0.034 Uiso 1 1 calc R . . 
C30 C 2.0511(4) -0.2582(2) -0.3921(2) 0.0312(10) Uani 1 1 d . . . 
H30A H 2.1340 -0.2595 -0.4193 0.037 Uiso 1 1 calc R . . 
C31 C 1.9237(4) -0.2569(2) -0.4375(2) 0.0230(9) Uani 1 1 d . . . 
H31A H 1.9213 -0.2567 -0.4962 0.028 Uiso 1 1 calc R . . 
Cl2 Cl 1.0077(3) -0.08237(17) -0.4421(2) 0.0699(8) Uani 0.50 1 d P . . 
Cl3 Cl 1.0603(3) 0.06830(18) -0.49151(18) 0.0592(8) Uani 0.50 1 d P . . 
C32 C 0.9397(15) -0.0145(9) -0.4953(10) 0.078(4) Uani 0.50 1 d P . . 
H32C H 0.856(12) 0.013(7) -0.470(6) 0.093 Uiso 0.50 1 d P . . 
H32A H 0.969(13) -0.018(7) -0.558(6) 0.093 Uiso 0.50 1 d P . . 
  
loop_ 
_atom_site_aniso_label 
_atom_site_aniso_U_11 
_atom_site_aniso_U_22 
_atom_site_aniso_U_33 
_atom_site_aniso_U_23 
_atom_site_aniso_U_13 
_atom_site_aniso_U_12 
Ir 0.01265(7) 0.01208(7) 0.01042(6) -0.00043(5) 0.00318(4) 0.00106(7) 
Cl1 0.0196(4) 0.0189(4) 0.0134(3) 0.0026(3) 0.0047(3) 0.0017(4) 
F1 0.0530(16) 0.0245(13) 0.0247(10) 0.0061(9) 0.0209(10) -0.0071(12) 
F2 0.0248(12) 0.0186(11) 0.0205(9) 0.0021(9) 0.0096(8) 0.0077(11) 
F3 0.0215(12) 0.0353(14) 0.0339(11) 0.0058(10) -0.0118(9) -0.0055(11) 
F4 0.0288(13) 0.0171(12) 0.0397(12) -0.0140(9) 0.0005(10) -0.0007(10) 
O1 0.0324(16) 0.0140(14) 0.0216(12) 0.0014(10) 0.0122(11) 0.0052(12) 
O2 0.0184(14) 0.0165(14) 0.0184(11) -0.0020(9) 0.0024(10) 0.0049(11) 
N1 0.0144(15) 0.0115(15) 0.0121(12) -0.0008(10) 0.0040(11) 0.0005(12) 
N2 0.0138(15) 0.0097(14) 0.0127(12) 0.0007(10) 0.0055(10) 0.0010(12) 
N3 0.0178(15) 0.0130(16) 0.0148(13) 0.0013(10) 0.0046(11) 0.0024(13) 
C1 0.0140(18) 0.0164(19) 0.0172(15) -0.0045(13) 0.0031(13) 0.0033(16) 
C2 0.022(2) 0.018(2) 0.0207(16) -0.0045(14) 0.0066(14) -0.0001(17) 
C3 0.026(2) 0.028(2) 0.0272(19) -0.0085(16) 0.0113(16) -0.0025(19) 
C4 0.027(2) 0.022(2) 0.035(2) -0.0113(17) 0.0127(17) 0.0058(19) 
C5 0.036(3) 0.018(2) 0.033(2) -0.0043(16) 0.0079(18) 0.0092(19) 
C6 0.020(2) 0.024(2) 0.0191(16) -0.0039(15) 0.0081(14) 0.0014(18) 
C7 0.0185(19) 0.0138(19) 0.0176(15) -0.0040(13) 0.0024(13) 0.0005(16) 
C8 0.0173(19) 0.0151(19) 0.0131(14) 0.0025(13) 0.0022(13) 0.0008(16) 
C9 0.024(2) 0.0147(19) 0.0203(16) 0.0004(14) 0.0053(14) -0.0022(16) 
C10 0.027(2) 0.021(2) 0.0138(15) 0.0032(14) 0.0067(14) -0.0078(17) 
C11 0.0160(19) 0.025(2) 0.0147(15) -0.0004(14) 0.0072(13) -0.0025(16) 
C12 0.0183(19) 0.0127(19) 0.0162(15) -0.0025(13) 0.0017(13) -0.0018(16) 
C13 0.0109(17) 0.0131(18) 0.0098(14) -0.0005(12) 0.0013(12) -0.0005(14) 
C14 0.023(2) 0.0120(18) 0.0110(14) -0.0003(13) 0.0062(13) -0.0030(16) 
C15 0.020(2) 0.022(2) 0.0191(16) -0.0005(14) 0.0012(14) -0.0017(17) 
C16 0.030(2) 0.024(2) 0.0226(17) -0.0056(15) 0.0016(16) -0.0072(19) 
C17 0.037(2) 0.0133(19) 0.0222(17) -0.0013(14) 0.0091(16) -0.0013(18) 
C18 0.030(2) 0.016(2) 0.0201(17) 0.0015(14) 0.0093(15) 0.0071(18) 
C19 0.021(2) 0.0149(19) 0.0127(15) 0.0019(13) 0.0042(13) -0.0001(16) 
C20 0.0139(18) 0.0179(19) 0.0113(14) 0.0021(13) 0.0038(12) 0.0030(15) 
C21 0.0173(18) 0.0178(19) 0.0108(14) 0.0034(12) 0.0036(12) 0.0010(15) 
C22 0.0182(19) 0.024(2) 0.0193(16) 0.0063(15) 0.0024(14) 0.0021(17) 
C23 0.0168(18) 0.030(2) 0.0116(15) 0.0079(15) -0.0044(12) -0.0074(19) 
C24 0.027(2) 0.021(2) 0.0159(15) -0.0005(14) -0.0004(14) -0.0111(18) 
C25 0.022(2) 0.0134(18) 0.0177(15) -0.0008(13) 0.0058(14) -0.0006(16) 
C26 0.0171(18) 0.019(2) 0.0088(14) 0.0022(13) 0.0040(12) -0.0033(16) 
C27 0.023(2) 0.022(2) 0.0137(15) -0.0013(13) 0.0047(13) -0.0016(17) 
C28 0.027(2) 0.023(2) 0.0148(15) -0.0001(14) 0.0021(14) 0.0055(17) 
C29 0.019(2) 0.044(3) 0.0210(17) 0.0031(16) -0.0037(15) 0.005(2) 
C30 0.0150(19) 0.056(3) 0.0228(18) 0.0061(17) 0.0038(14) 0.003(2) 
C31 0.0190(19) 0.031(2) 0.0193(16) 0.0049(15) 0.0043(14) 0.0019(17) 
Cl2 0.0430(17) 0.0536(19) 0.116(2) -0.0245(18) 0.0274(17) -0.0042(15) 
Cl3 0.063(2) 0.054(2) 0.0646(17) 0.0272(15) 0.0271(14) 0.0291(17) 
C32 0.068(10) 0.061(10) 0.111(10) -0.005(9) 0.048(8) 0.011(9) 
  
_geom_special_details 
; 
 All esds (except the esd in the dihedral angle between two l.s. planes) 
 are estimated using the full covariance matrix.  The cell esds are taken 
 into account individually in the estimation of esds in distances, angles 
 and torsion angles; correlations between esds in cell parameters are only 
 used when they are defined by crystal symmetry.  An approximate (isotropic) 
 treatment of cell esds is used for estimating esds involving l.s. planes. 
; 
  
loop_ 
_geom_bond_atom_site_label_1 
_geom_bond_atom_site_label_2 
_geom_bond_distance 
_geom_bond_site_symmetry_2 
_geom_bond_publ_flag 
Ir C26 2.020(3) . ? 
Ir C13 2.041(3) . ? 
Ir N1 2.042(3) . ? 
Ir N2 2.049(3) . ? 
Ir N3 2.159(3) . ? 
Ir Cl1 2.4395(8) . ? 
F1 C10 1.362(4) . ? 
F2 C12 1.368(4) . ? 
F3 C23 1.355(4) . ? 
F4 C25 1.354(4) . ? 
O1 C7 1.342(4) . ? 
O1 C6 1.406(4) . ? 
O2 C20 1.349(4) . ? 
O2 C19 1.393(4) . ? 
N1 C7 1.295(4) . ? 
N1 C1 1.423(4) . ? 
N2 C20 1.302(4) . ? 
N2 C14 1.406(4) . ? 
N3 C31 1.331(4) . ? 
N3 C27 1.353(4) . ? 
C1 C6 1.374(5) . ? 
C1 C2 1.381(4) . ? 
C2 C3 1.382(5) . ? 
C2 H2A 0.9500 . ? 
C3 C4 1.388(5) . ? 
C3 H3A 0.9500 . ? 
C4 C5 1.380(5) . ? 
C4 H4A 0.9500 . ? 
C5 C6 1.371(5) . ? 
C5 H5A 0.9500 . ? 
C7 C8 1.448(4) . ? 
C8 C9 1.398(4) . ? 
C8 C13 1.416(5) . ? 
C9 C10 1.362(5) . ? 
C9 H9A 0.9500 . ? 
C10 C11 1.373(5) . ? 
C11 C12 1.388(4) . ? 
C11 H11A 0.9500 . ? 
C12 C13 1.376(4) . ? 
C14 C19 1.385(5) . ? 
C14 C15 1.388(5) . ? 
C15 C16 1.391(5) . ? 
C15 H15A 0.9500 . ? 
C16 C17 1.392(5) . ? 
C16 H16A 0.9500 . ? 
C17 C18 1.379(5) . ? 
C17 H17A 0.9500 . ? 
C18 C19 1.369(5) . ? 
C18 H18A 0.9500 . ? 
C20 C21 1.441(5) . ? 
C21 C22 1.394(5) . ? 
C21 C26 1.417(5) . ? 
C22 C23 1.393(5) . ? 
C22 H22A 0.9500 . ? 
C23 C24 1.373(5) . ? 
C24 C25 1.372(5) . ? 
C24 H24A 0.9500 . ? 
C25 C26 1.382(4) . ? 
C27 C28 1.366(5) . ? 
C27 H27A 0.9500 . ? 
C28 C29 1.362(5) . ? 
C28 H28A 0.9500 . ? 
C29 C30 1.387(5) . ? 
C29 H29A 0.9500 . ? 
C30 C31 1.388(5) . ? 
C30 H30A 0.9500 . ? 
C31 H31A 0.9500 . ? 
Cl2 Cl3 1.242(4) 3_754 ? 
Cl2 C32 1.605(17) . ? 
Cl2 C32 2.099(16) 3_754 ? 
Cl3 C32 0.990(15) 3_754 ? 
Cl3 Cl2 1.242(4) 3_754 ? 
Cl3 C32 1.892(16) . ? 
C32 Cl3 0.990(15) 3_754 ? 
C32 C32 1.30(3) 3_754 ? 
C32 Cl2 2.099(16) 3_754 ? 
C32 H32C 1.06(12) . ? 
C32 H32A 1.08(10) . ? 
  
loop_ 
_geom_angle_atom_site_label_1 
_geom_angle_atom_site_label_2 
_geom_angle_atom_site_label_3 
_geom_angle 
_geom_angle_site_symmetry_1 
_geom_angle_site_symmetry_3 
_geom_angle_publ_flag 
C26 Ir C13 87.75(12) . . ? 
C26 Ir N1 97.65(12) . . ? 
C13 Ir N1 79.51(12) . . ? 
C26 Ir N2 79.32(12) . . ? 
C13 Ir N2 97.21(11) . . ? 
N1 Ir N2 175.67(11) . . ? 
C26 Ir N3 178.22(11) . . ? 
C13 Ir N3 91.23(11) . . ? 
N1 Ir N3 83.60(10) . . ? 
N2 Ir N3 99.37(10) . . ? 
C26 Ir Cl1 89.98(9) . . ? 
C13 Ir Cl1 175.66(9) . . ? 
N1 Ir Cl1 97.14(7) . . ? 
N2 Ir Cl1 85.99(7) . . ? 
N3 Ir Cl1 91.12(7) . . ? 
C7 O1 C6 103.8(3) . . ? 
C20 O2 C19 104.0(2) . . ? 
C7 N1 C1 105.0(3) . . ? 
C7 N1 Ir 114.6(2) . . ? 
C1 N1 Ir 140.2(2) . . ? 
C20 N2 C14 105.4(3) . . ? 
C20 N2 Ir 114.3(2) . . ? 
C14 N2 Ir 140.2(2) . . ? 
C31 N3 C27 117.2(3) . . ? 
C31 N3 Ir 121.1(2) . . ? 
C27 N3 Ir 121.2(2) . . ? 
C6 C1 C2 119.9(3) . . ? 
C6 C1 N1 107.1(3) . . ? 
C2 C1 N1 133.0(3) . . ? 
C1 C2 C3 116.4(3) . . ? 
C1 C2 H2A 121.8 . . ? 
C3 C2 H2A 121.8 . . ? 
C2 C3 C4 122.3(3) . . ? 
C2 C3 H3A 118.8 . . ? 
C4 C3 H3A 118.8 . . ? 
C5 C4 C3 121.7(4) . . ? 
C5 C4 H4A 119.2 . . ? 
C3 C4 H4A 119.2 . . ? 
C6 C5 C4 114.6(4) . . ? 
C6 C5 H5A 122.7 . . ? 
C4 C5 H5A 122.7 . . ? 
C5 C6 C1 125.1(3) . . ? 
C5 C6 O1 126.5(3) . . ? 
C1 C6 O1 108.3(3) . . ? 
N1 C7 O1 115.7(3) . . ? 
N1 C7 C8 119.5(3) . . ? 
O1 C7 C8 124.7(3) . . ? 
C9 C8 C13 124.3(3) . . ? 
C9 C8 C7 124.2(3) . . ? 
C13 C8 C7 111.4(3) . . ? 
C10 C9 C8 116.8(3) . . ? 
C10 C9 H9A 121.6 . . ? 
C8 C9 H9A 121.6 . . ? 
F1 C10 C9 119.0(3) . . ? 
F1 C10 C11 117.9(3) . . ? 
C9 C10 C11 123.1(3) . . ? 
C10 C11 C12 117.1(3) . . ? 
C10 C11 H11A 121.4 . . ? 
C12 C11 H11A 121.4 . . ? 
F2 C12 C13 119.0(3) . . ? 
F2 C12 C11 115.7(3) . . ? 
C13 C12 C11 125.3(3) . . ? 
C12 C13 C8 113.4(3) . . ? 
C12 C13 Ir 132.1(3) . . ? 
C8 C13 Ir 114.5(2) . . ? 
C19 C14 C15 120.0(3) . . ? 
C19 C14 N2 107.2(3) . . ? 
C15 C14 N2 132.8(3) . . ? 
C14 C15 C16 116.0(3) . . ? 
C14 C15 H15A 122.0 . . ? 
C16 C15 H15A 122.0 . . ? 
C15 C16 C17 122.4(4) . . ? 
C15 C16 H16A 118.8 . . ? 
C17 C16 H16A 118.8 . . ? 
C18 C17 C16 121.8(4) . . ? 
C18 C17 H17A 119.1 . . ? 
C16 C17 H17A 119.1 . . ? 
C19 C18 C17 115.0(3) . . ? 
C19 C18 H18A 122.5 . . ? 
C17 C18 H18A 122.5 . . ? 
C18 C19 C14 124.8(3) . . ? 
C18 C19 O2 126.9(3) . . ? 
C14 C19 O2 108.3(3) . . ? 
N2 C20 O2 115.1(3) . . ? 
N2 C20 C21 119.8(3) . . ? 
O2 C20 C21 125.1(3) . . ? 
C22 C21 C26 125.3(3) . . ? 
C22 C21 C20 124.0(3) . . ? 
C26 C21 C20 110.8(3) . . ? 
C23 C22 C21 115.4(3) . . ? 
C23 C22 H22A 122.3 . . ? 
C21 C22 H22A 122.3 . . ? 
F3 C23 C24 118.6(3) . . ? 
F3 C23 C22 118.5(3) . . ? 
C24 C23 C22 122.8(3) . . ? 
C23 C24 C25 117.9(3) . . ? 
C23 C24 H24A 121.0 . . ? 
C25 C24 H24A 121.0 . . ? 
F4 C25 C24 116.7(3) . . ? 
F4 C25 C26 118.2(3) . . ? 
C24 C25 C26 125.1(3) . . ? 
C25 C26 C21 113.3(3) . . ? 
C25 C26 Ir 130.9(3) . . ? 
C21 C26 Ir 115.8(2) . . ? 
N3 C27 C28 122.9(3) . . ? 
N3 C27 H27A 118.5 . . ? 
C28 C27 H27A 118.5 . . ? 
C29 C28 C27 119.9(3) . . ? 
C29 C28 H28A 120.0 . . ? 
C27 C28 H28A 120.0 . . ? 
C28 C29 C30 118.2(3) . . ? 
C28 C29 H29A 120.9 . . ? 
C30 C29 H29A 120.9 . . ? 
C31 C30 C29 119.0(4) . . ? 
C31 C30 H30A 120.5 . . ? 
C29 C30 H30A 120.5 . . ? 
N3 C31 C30 122.7(3) . . ? 
N3 C31 H31A 118.7 . . ? 
C30 C31 H31A 118.7 . . ? 
Cl3 Cl2 C32 38.1(6) 3_754 . ? 
Cl3 Cl2 C32 63.0(5) 3_754 3_754 ? 
C32 Cl2 C32 38.4(9) . 3_754 ? 
C32 Cl3 Cl2 91.2(11) 3_754 3_754 ? 
C32 Cl3 C32 40.2(12) 3_754 . ? 
Cl2 Cl3 C32 81.2(6) 3_754 . ? 
Cl3 C32 C32 110.5(18) 3_754 3_754 ? 
Cl3 C32 Cl2 50.7(8) 3_754 . ? 
C32 C32 Cl2 91.8(16) 3_754 . ? 
Cl3 C32 Cl3 139.8(12) 3_754 . ? 
C32 C32 Cl3 29.3(10) 3_754 . ? 
Cl2 C32 Cl3 110.7(9) . . ? 
Cl3 C32 Cl2 134.6(12) 3_754 3_754 ? 
C32 C32 Cl2 49.9(12) 3_754 3_754 ? 
Cl2 C32 Cl2 141.6(9) . 3_754 ? 
Cl3 C32 Cl2 35.8(3) . 3_754 ? 
Cl3 C32 H32C 123(7) 3_754 . ? 
C32 C32 H32C 126(7) 3_754 . ? 
Cl2 C32 H32C 116(6) . . ? 
Cl3 C32 H32C 97(6) . . ? 
Cl2 C32 H32C 91(6) 3_754 . ? 
Cl3 C32 H32A 74(7) 3_754 . ? 
C32 C32 H32A 67(6) 3_754 . ? 
Cl2 C32 H32A 109(7) . . ? 
Cl3 C32 H32A 83(7) . . ? 
Cl2 C32 H32A 60(7) 3_754 . ? 
H32C C32 H32A 131(9) . . ? 
  
_diffrn_measured_fraction_theta_max 0.857 
_diffrn_reflns_theta_full        26.00 
_diffrn_measured_fraction_theta_full 0.998 
_refine_diff_density_max         1.719 
_refine_diff_density_min         -1.023 
_refine_diff_density_rms         0.118 
  
