# Supplementary material
Source: MDPI journal article supplement (https://www.mdpi.com/2304-6740/6/4/118)
Supplement: s1 [file s1 › inorganics-371116-supplementary/6. FPYCNM.CIF]

 
data_fpycnm

_audit_creation_method           SHELXL-97
_chemical_name_systematic        ?
_chemical_name_common            ?
_chemical_melting_point          ?
_chemical_formula_moiety         '4(C32 H16 Cl F4 Ir N4 O2), 1.2(O), 1.2(O), O'
_chemical_formula_sum            'C128 H70.80 Cl4 F16 Ir4 N16 O11.40'
_chemical_formula_weight         3229.81

loop_
_atom_type_symbol
_atom_type_description
_atom_type_scat_dispersion_real
_atom_type_scat_dispersion_imag
_atom_type_scat_source
C C 0.0033 0.0016 'International Tables Vol C Tables 4.2.6.8 and 6.1.1.4'
H H 0.0000 0.0000 'International Tables Vol C Tables 4.2.6.8 and 6.1.1.4'
N N 0.0061 0.0033 'International Tables Vol C Tables 4.2.6.8 and 6.1.1.4'
O O 0.0106 0.0060 'International Tables Vol C Tables 4.2.6.8 and 6.1.1.4'
F F 0.0171 0.0103 'International Tables Vol C Tables 4.2.6.8 and 6.1.1.4'
Cl Cl 0.1484 0.1585 'International Tables Vol C Tables 4.2.6.8 and 6.1.1.4'
Ir Ir -1.4442 7.9887 'International Tables Vol C Tables 4.2.6.8 and 6.1.1.4'

_symmetry_cell_setting           monoclinic
_symmetry_space_group_name_H-M   'P 21/c'
_symmetry_int_tables_number      14

loop_
_symmetry_equiv_pos_as_xyz
'x, y, z'
'-x, y+1/2, -z+1/2'
'-x, -y, -z'
'x, -y-1/2, z-1/2'

_cell_length_a                   23.9090(12)
_cell_length_b                   13.5257(7)
_cell_length_c                   20.3311(10)
_cell_angle_alpha                90.00
_cell_angle_beta                 111.9160(10)
_cell_angle_gamma                90.00
_cell_volume                     6099.6(5)
_cell_formula_units_Z            2
_cell_measurement_temperature    297(2)
_cell_measurement_reflns_used    7199
_cell_measurement_theta_min      2.239
_cell_measurement_theta_max      26.000

_exptl_crystal_description       parallelepiped
_exptl_crystal_colour            yellow
_exptl_crystal_size_max          0.48
_exptl_crystal_size_mid          0.40
_exptl_crystal_size_min          0.21
_exptl_crystal_density_meas      ?
_exptl_crystal_density_diffrn    1.759
_exptl_crystal_density_method    'not measured'
_exptl_crystal_F_000             3124
_exptl_absorpt_coefficient_mu    4.529
_exptl_absorpt_correction_type   empirical
_exptl_absorpt_correction_T_min  0.487
_exptl_absorpt_correction_T_max  1.000
_exptl_absorpt_process_details   ?

_exptl_special_details           
; 
 ? 
;

_diffrn_ambient_temperature      297(2)
_diffrn_radiation_probe          x-ray
_diffrn_radiation_type           MoK\a
_diffrn_radiation_wavelength     0.71073
_diffrn_source                   'fine-focus sealed tube'
_diffrn_radiation_monochromator  graphite
_diffrn_measurement_device_type  'CCD area detector'
_diffrn_measurement_method       'phi and omega scans'
_diffrn_detector_area_resol_mean ?
_diffrn_standards_number         ?
_diffrn_standards_interval_count ?
_diffrn_standards_interval_time  ?
_diffrn_standards_decay_%        ?
_diffrn_reflns_number            33780
_diffrn_reflns_av_R_equivalents  0.0326
_diffrn_reflns_av_sigmaI/netI    0.0332
_diffrn_reflns_limit_h_min       -27
_diffrn_reflns_limit_h_max       29
_diffrn_reflns_limit_k_min       -13
_diffrn_reflns_limit_k_max       16
_diffrn_reflns_limit_l_min       -25
_diffrn_reflns_limit_l_max       22
_diffrn_reflns_theta_min         1.84
_diffrn_reflns_theta_max         26.03
_reflns_number_total             11970
_reflns_number_gt                9598
_reflns_threshold_expression     >2sigma(I)

_computing_data_collection       'Bruker SMART'
_computing_cell_refinement       'Bruker SMART'
_computing_data_reduction        'Bruker SHELXTL'
_computing_structure_solution    'SHELXS-97 (Sheldrick, 1990)'
_computing_structure_refinement  'SHELXL-97 (Sheldrick, 1997)'
_computing_molecular_graphics    'Bruker SHELXTL'
_computing_publication_material  'Bruker SHELXTL'

_refine_special_details          
; 
 Refinement of F^2^ against ALL reflections.  The weighted R-factor wR and 
 goodness of fit S are based on F^2^, conventional R-factors R are based 
 on F, with F set to zero for negative F^2^. The threshold expression of 
 F^2^ > 2sigma(F^2^) is used only for calculating R-factors(gt) etc. and is 
 not relevant to the choice of reflections for refinement.  R-factors based 
 on F^2^ are statistically about twice as large as those based on F, and R- 
 factors based on ALL data will be even larger. 
;

_refine_ls_structure_factor_coef Fsqd
_refine_ls_matrix_type           full
_refine_ls_weighting_scheme      calc
_refine_ls_weighting_details     
'calc w=1/[\s^2^(Fo^2^)+(0.0500P)^2^+0.0000P] where P=(Fo^2^+2Fc^2^)/3'
_atom_sites_solution_primary     direct
_atom_sites_solution_secondary   difmap
_atom_sites_solution_hydrogens   geom
_refine_ls_hydrogen_treatment    constro
_refine_ls_extinction_method     none
_refine_ls_extinction_coef       ?
_refine_ls_number_reflns         11970
_refine_ls_number_parameters     829
_refine_ls_number_restraints     0
_refine_ls_R_factor_all          0.0444
_refine_ls_R_factor_gt           0.0319
_refine_ls_wR_factor_ref         0.0899
_refine_ls_wR_factor_gt          0.0847
_refine_ls_goodness_of_fit_ref   1.070
_refine_ls_restrained_S_all      1.070
_refine_ls_shift/su_max          0.005
_refine_ls_shift/su_mean         0.000

loop_
_atom_site_label
_atom_site_type_symbol
_atom_site_fract_x
_atom_site_fract_y
_atom_site_fract_z
_atom_site_U_iso_or_equiv
_atom_site_adp_type
_atom_site_occupancy
_atom_site_symmetry_multiplicity
_atom_site_calc_flag
_atom_site_refinement_flags
_atom_site_disorder_assembly
_atom_site_disorder_group
Ir1 Ir 0.036995(8) 0.796796(13) 0.865058(8) 0.03315(6) Uani 1 1 d . . .
Ir2 Ir 0.536142(8) 0.535302(13) 0.356299(9) 0.03628(7) Uani 1 1 d . . .
Cl1 Cl 0.07957(6) 0.74811(9) 0.98998(6) 0.0500(3) Uani 1 1 d . . .
Cl2 Cl 0.58159(7) 0.49814(11) 0.48163(6) 0.0584(4) Uani 1 1 d . . .
F1 F 0.18621(17) 1.1798(3) 0.9680(2) 0.0875(12) Uani 1 1 d . . .
F2 F 0.18160(13) 0.8561(2) 0.88560(18) 0.0628(8) Uani 1 1 d . . .
F3 F -0.04528(19) 0.8645(3) 0.54160(16) 0.0918(13) Uani 1 1 d . . .
F4 F -0.06537(17) 0.9575(3) 0.75160(16) 0.0804(12) Uani 1 1 d . . .
F5 F 0.6821(2) 0.9177(4) 0.4621(4) 0.164(3) Uani 1 1 d . . .
F6 F 0.67776(16) 0.6028(3) 0.3694(2) 0.0903(12) Uani 1 1 d . . .
F7 F 0.4615(2) 0.5856(3) 0.03186(17) 0.1073(15) Uani 1 1 d . . .
F8 F 0.42957(18) 0.6817(3) 0.23474(18) 0.0845(12) Uani 1 1 d . . .
O1 O -0.03213(15) 1.0491(2) 0.91791(17) 0.0440(8) Uani 1 1 d . . .
O2 O 0.11916(15) 0.6634(2) 0.74338(18) 0.0481(8) Uani 1 1 d . . .
O3 O 0.46718(18) 0.7824(3) 0.4152(2) 0.0574(10) Uani 1 1 d . . .
O4 O 0.62312(15) 0.3954(2) 0.24217(17) 0.0475(8) Uani 1 1 d . . .
N1 N -0.01849(17) 0.8946(3) 0.88856(18) 0.0360(8) Uani 1 1 d . . .
N2 N 0.09271(17) 0.7120(3) 0.83225(19) 0.0378(9) Uani 1 1 d . . .
N3 N -0.02400(17) 0.6705(3) 0.84353(18) 0.0371(9) Uani 1 1 d . . .
N4 N -0.1786(3) 0.3651(4) 0.7936(3) 0.0895(18) Uani 1 1 d . . .
N5 N 0.47854(17) 0.6328(3) 0.37655(19) 0.0398(9) Uani 1 1 d . . .
N6 N 0.59423(17) 0.4489(3) 0.32829(19) 0.0390(9) Uani 1 1 d . . .
N7 N 0.47821(18) 0.4090(3) 0.3435(2) 0.0428(9) Uani 1 1 d . . .
N8 N 0.3188(10) 0.1118(18) 0.3089(14) 0.121(7) Uani 0.70 1 d P . .
N8' N 0.340(2) 0.102(3) 0.329(4) 0.16(3) Uani 0.30 1 d P . .
C1 C -0.0783(2) 0.9030(4) 0.8840(2) 0.0403(11) Uani 1 1 d . . .
C2 C -0.1271(2) 0.8382(4) 0.8627(3) 0.0552(14) Uani 1 1 d . . .
H2A H -0.1234 0.7733 0.8500 0.066 Uiso 1 1 calc R . .
C3 C -0.1815(3) 0.8753(4) 0.8614(3) 0.0618(15) Uani 1 1 d . . .
H3A H -0.2152 0.8343 0.8472 0.074 Uiso 1 1 calc R . .
C4 C -0.1870(3) 0.9723(4) 0.8810(3) 0.0589(15) Uani 1 1 d . . .
H4A H -0.2242 0.9939 0.8803 0.071 Uiso 1 1 calc R . .
C5 C -0.1393(2) 1.0373(4) 0.9013(3) 0.0526(13) Uani 1 1 d . . .
H5A H -0.1429 1.1025 0.9137 0.063 Uiso 1 1 calc R . .
C6 C -0.0859(2) 0.9988(4) 0.9018(2) 0.0408(11) Uani 1 1 d . . .
C7 C 0.0057(2) 0.9810(3) 0.9078(2) 0.0380(10) Uani 1 1 d . . .
C8 C 0.0657(2) 1.0004(3) 0.9137(2) 0.0384(10) Uani 1 1 d . . .
C9 C 0.0956(2) 1.0905(4) 0.9375(3) 0.0476(12) Uani 1 1 d . . .
H9A H 0.0764 1.1440 0.9485 0.057 Uiso 1 1 calc R . .
C10 C 0.1548(3) 1.0955(4) 0.9438(3) 0.0560(14) Uani 1 1 d . . .
C11 C 0.1833(2) 1.0176(4) 0.9274(3) 0.0552(14) Uani 1 1 d . . .
H11A H 0.2235 1.0226 0.9325 0.066 Uiso 1 1 calc R . .
C12 C 0.1516(2) 0.9309(4) 0.9030(2) 0.0444(12) Uani 1 1 d . . .
C13 C 0.09186(19) 0.9167(3) 0.8939(2) 0.0342(10) Uani 1 1 d . . .
C14 C 0.1416(2) 0.6489(3) 0.8605(3) 0.0432(11) Uani 1 1 d . . .
C15 C 0.1732(3) 0.6160(4) 0.9277(3) 0.0587(15) Uani 1 1 d . . .
H15A H 0.1628 0.6351 0.9656 0.070 Uiso 1 1 calc R . .
C16 C 0.2214(3) 0.5531(5) 0.9371(4) 0.083(2) Uani 1 1 d . . .
H16A H 0.2438 0.5294 0.9823 0.100 Uiso 1 1 calc R . .
C17 C 0.2369(3) 0.5246(5) 0.8804(4) 0.087(2) Uani 1 1 d . . .
H17A H 0.2696 0.4825 0.8887 0.105 Uiso 1 1 calc R . .
C18 C 0.2052(3) 0.5567(4) 0.8123(4) 0.0677(17) Uani 1 1 d . . .
H18A H 0.2151 0.5372 0.7741 0.081 Uiso 1 1 calc R . .
C19 C 0.1582(2) 0.6194(4) 0.8046(3) 0.0487(12) Uani 1 1 d . . .
C20 C 0.0822(2) 0.7176(3) 0.7649(2) 0.0367(10) Uani 1 1 d . . .
C21 C 0.0354(2) 0.7812(3) 0.7201(2) 0.0377(10) Uani 1 1 d . . .
C22 C 0.0186(3) 0.7901(4) 0.6468(3) 0.0497(13) Uani 1 1 d . . .
H22A H 0.0380 0.7543 0.6225 0.060 Uiso 1 1 calc R . .
C23 C -0.0277(3) 0.8539(4) 0.6121(3) 0.0586(15) Uani 1 1 d . . .
C24 C -0.0551(3) 0.9108(4) 0.6469(3) 0.0591(15) Uani 1 1 d . . .
H24A H -0.0849 0.9561 0.6226 0.071 Uiso 1 1 calc R . .
C25 C -0.0369(2) 0.8986(4) 0.7199(3) 0.0487(13) Uani 1 1 d . . .
C26 C 0.0072(2) 0.8339(3) 0.7598(2) 0.0375(10) Uani 1 1 d . . .
C27 C -0.0517(3) 0.6332(4) 0.7794(3) 0.0593(15) Uani 1 1 d . . .
H27A H -0.0438 0.6615 0.7420 0.071 Uiso 1 1 calc R . .
C28 C -0.0914(3) 0.5549(5) 0.7646(3) 0.0678(17) Uani 1 1 d . . .
H28A H -0.1102 0.5321 0.7183 0.081 Uiso 1 1 calc R . .
C29 C -0.1027(2) 0.5117(4) 0.8186(3) 0.0506(13) Uani 1 1 d . . .
C30 C -0.0735(3) 0.5468(5) 0.8855(3) 0.0717(19) Uani 1 1 d . . .
H30A H -0.0797 0.5177 0.9237 0.086 Uiso 1 1 calc R . .
C31 C -0.0344(3) 0.6257(4) 0.8964(3) 0.0630(16) Uani 1 1 d . . .
H31A H -0.0146 0.6486 0.9424 0.076 Uiso 1 1 calc R . .
C32 C -0.1448(3) 0.4284(5) 0.8039(3) 0.0656(16) Uani 1 1 d . . .
C33 C 0.4182(2) 0.6399(4) 0.3715(2) 0.0419(11) Uani 1 1 d . . .
C34 C 0.3693(2) 0.5791(4) 0.3471(3) 0.0545(13) Uani 1 1 d . . .
H34A H 0.3716 0.5166 0.3292 0.065 Uiso 1 1 calc R . .
C35 C 0.3159(3) 0.6144(5) 0.3501(3) 0.0645(16) Uani 1 1 d . . .
H35A H 0.2817 0.5746 0.3339 0.077 Uiso 1 1 calc R . .
C36 C 0.3120(3) 0.7075(5) 0.3768(3) 0.0696(18) Uani 1 1 d . . .
H36A H 0.2755 0.7282 0.3786 0.084 Uiso 1 1 calc R . .
C37 C 0.3603(3) 0.7690(5) 0.4004(3) 0.0658(16) Uani 1 1 d . . .
H37A H 0.3580 0.8319 0.4177 0.079 Uiso 1 1 calc R . .
C38 C 0.4121(3) 0.7333(4) 0.3970(3) 0.0493(13) Uani 1 1 d . . .
C39 C 0.5034(2) 0.7173(4) 0.4004(3) 0.0449(12) Uani 1 1 d . . .
C40 C 0.5635(2) 0.7377(4) 0.4074(3) 0.0500(13) Uani 1 1 d . . .
C41 C 0.5935(3) 0.8251(5) 0.4343(4) 0.0730(18) Uani 1 1 d . . .
H41A H 0.5752 0.8760 0.4496 0.088 Uiso 1 1 calc R . .
C42 C 0.6516(3) 0.8329(5) 0.4371(4) 0.095(2) Uani 1 1 d . . .
C43 C 0.6804(3) 0.7592(5) 0.4168(4) 0.083(2) Uani 1 1 d . . .
H43A H 0.7202 0.7662 0.4206 0.100 Uiso 1 1 calc R . .
C44 C 0.6482(3) 0.6734(5) 0.3903(3) 0.0596(14) Uani 1 1 d . . .
C45 C 0.5893(2) 0.6573(4) 0.3831(2) 0.0428(11) Uani 1 1 d . . .
C46 C 0.6442(2) 0.3870(3) 0.3594(2) 0.0426(11) Uani 1 1 d . . .
C47 C 0.6759(3) 0.3575(4) 0.4286(3) 0.0572(14) Uani 1 1 d . . .
H47A H 0.6647 0.3767 0.4658 0.069 Uiso 1 1 calc R . .
C48 C 0.7257(3) 0.2972(4) 0.4390(3) 0.0702(18) Uani 1 1 d . . .
H48A H 0.7491 0.2772 0.4848 0.084 Uiso 1 1 calc R . .
C49 C 0.7417(3) 0.2658(4) 0.3832(3) 0.0667(16) Uani 1 1 d . . .
H49A H 0.7749 0.2243 0.3927 0.080 Uiso 1 1 calc R . .
C50 C 0.7100(3) 0.2943(4) 0.3144(3) 0.0585(15) Uani 1 1 d . . .
H50A H 0.7205 0.2735 0.2769 0.070 Uiso 1 1 calc R . .
C51 C 0.6625(2) 0.3547(4) 0.3050(3) 0.0455(12) Uani 1 1 d . . .
C52 C 0.5844(2) 0.4508(3) 0.2610(2) 0.0400(11) Uani 1 1 d . . .
C53 C 0.5366(2) 0.5115(3) 0.2137(2) 0.0414(11) Uani 1 1 d . . .
C54 C 0.5233(3) 0.5173(4) 0.1401(3) 0.0570(14) Uani 1 1 d . . .
H54A H 0.5447 0.4815 0.1182 0.068 Uiso 1 1 calc R . .
C55 C 0.4768(3) 0.5790(5) 0.1030(3) 0.0649(17) Uani 1 1 d . . .
C56 C 0.4447(3) 0.6323(5) 0.1339(3) 0.0708(18) Uani 1 1 d . . .
H56A H 0.4129 0.6727 0.1071 0.085 Uiso 1 1 calc R . .
C57 C 0.4610(3) 0.6242(4) 0.2058(3) 0.0547(14) Uani 1 1 d . . .
C58 C 0.5065(2) 0.5626(3) 0.2502(2) 0.0392(11) Uani 1 1 d . . .
C59 C 0.4568(3) 0.3561(4) 0.2849(3) 0.0560(14) Uani 1 1 d . . .
H59A H 0.4684 0.3730 0.2475 0.067 Uiso 1 1 calc R . .
C60 C 0.4181(3) 0.2771(5) 0.2760(4) 0.0766(19) Uani 1 1 d . . .
H60A H 0.4042 0.2419 0.2337 0.092 Uiso 1 1 calc R . .
C61 C 0.4007(3) 0.2518(4) 0.3306(4) 0.0669(17) Uani 1 1 d . . .
C62 C 0.4224(3) 0.3048(5) 0.3915(4) 0.075(2) Uani 1 1 d . . .
H62A H 0.4112 0.2892 0.4294 0.090 Uiso 1 1 calc R . .
C63 C 0.4613(3) 0.3823(4) 0.3965(3) 0.0618(16) Uani 1 1 d . . .
H63A H 0.4764 0.4176 0.4387 0.074 Uiso 1 1 calc R . .
C64 C 0.3575(4) 0.1715(6) 0.3213(5) 0.097(3) Uani 1 1 d . . .
O5 O 0.2546(4) 0.3716(7) 1.2386(6) 0.201(8) Uani 0.60 1 d P . .
O6 O 0.2072(6) 0.4503(11) 1.0917(7) 0.189(6) Uani 0.60 1 d P . .
O7 O 0.2880(9) 1.1853(18) 0.9005(11) 0.276(13) Uani 0.50 1 d P . .

loop_
_atom_site_aniso_label
_atom_site_aniso_U_11
_atom_site_aniso_U_22
_atom_site_aniso_U_33
_atom_site_aniso_U_23
_atom_site_aniso_U_13
_atom_site_aniso_U_12
Ir1 0.03395(11) 0.03552(11) 0.03139(10) -0.00465(7) 0.01382(8) 0.00059(7)
Ir2 0.03733(12) 0.03786(11) 0.03624(10) -0.00065(7) 0.01671(8) 0.00325(8)
Cl1 0.0583(8) 0.0519(8) 0.0346(6) -0.0015(5) 0.0115(6) -0.0044(6)
Cl2 0.0663(9) 0.0717(9) 0.0380(6) 0.0024(6) 0.0205(6) 0.0111(7)
F1 0.072(3) 0.059(2) 0.128(3) -0.023(2) 0.033(2) -0.0314(19)
F2 0.0407(18) 0.064(2) 0.091(2) -0.0108(17) 0.0324(17) -0.0008(15)
F3 0.115(3) 0.125(3) 0.0366(16) 0.0154(19) 0.0294(19) 0.042(3)
F4 0.094(3) 0.101(3) 0.0491(18) 0.0125(17) 0.0302(19) 0.061(2)
F5 0.086(3) 0.107(4) 0.285(7) -0.095(4) 0.054(4) -0.060(3)
F6 0.053(2) 0.081(3) 0.150(4) -0.023(2) 0.054(2) -0.0019(19)
F7 0.152(4) 0.128(4) 0.0419(18) 0.030(2) 0.037(2) 0.058(3)
F8 0.091(3) 0.103(3) 0.064(2) 0.0254(19) 0.035(2) 0.062(2)
O1 0.043(2) 0.0398(18) 0.0523(19) -0.0101(15) 0.0208(16) 0.0026(15)
O2 0.050(2) 0.046(2) 0.057(2) -0.0045(16) 0.0293(18) 0.0086(16)
O3 0.054(2) 0.052(2) 0.072(2) -0.0203(19) 0.029(2) 0.0024(18)
O4 0.050(2) 0.051(2) 0.0486(19) 0.0006(16) 0.0268(17) 0.0099(16)
N1 0.035(2) 0.041(2) 0.0356(19) -0.0083(16) 0.0169(17) -0.0035(17)
N2 0.034(2) 0.036(2) 0.042(2) -0.0034(16) 0.0127(17) 0.0006(16)
N3 0.040(2) 0.038(2) 0.0337(19) -0.0064(16) 0.0139(17) -0.0016(17)
N4 0.076(4) 0.076(4) 0.110(5) -0.006(3) 0.027(4) -0.032(3)
N5 0.034(2) 0.043(2) 0.044(2) -0.0050(18) 0.0164(18) 0.0009(18)
N6 0.038(2) 0.043(2) 0.037(2) -0.0004(17) 0.0145(17) 0.0051(17)
N7 0.047(3) 0.040(2) 0.046(2) -0.0005(18) 0.022(2) 0.0022(19)
N8 0.108(15) 0.104(13) 0.157(11) -0.008(9) 0.056(11) -0.056(10)
N8' 0.11(3) 0.045(16) 0.39(9) -0.06(3) 0.18(5) -0.028(18)
C1 0.037(3) 0.049(3) 0.040(2) -0.003(2) 0.020(2) 0.004(2)
C2 0.048(3) 0.049(3) 0.075(4) -0.021(3) 0.031(3) -0.010(3)
C3 0.045(3) 0.059(4) 0.091(4) -0.011(3) 0.037(3) -0.009(3)
C4 0.042(3) 0.076(4) 0.066(4) -0.002(3) 0.028(3) 0.005(3)
C5 0.052(3) 0.053(3) 0.057(3) -0.006(3) 0.024(3) 0.012(3)
C6 0.043(3) 0.043(3) 0.040(2) -0.005(2) 0.020(2) -0.001(2)
C7 0.041(3) 0.037(3) 0.038(2) -0.005(2) 0.018(2) 0.002(2)
C8 0.040(3) 0.040(3) 0.034(2) -0.004(2) 0.013(2) -0.004(2)
C9 0.050(3) 0.040(3) 0.052(3) -0.005(2) 0.017(3) -0.006(2)
C10 0.053(4) 0.046(3) 0.062(3) -0.006(3) 0.013(3) -0.019(3)
C11 0.038(3) 0.063(4) 0.061(3) 0.006(3) 0.015(3) -0.009(3)
C12 0.042(3) 0.051(3) 0.039(2) -0.001(2) 0.015(2) 0.001(2)
C13 0.031(3) 0.043(3) 0.028(2) 0.0021(19) 0.0095(18) -0.001(2)
C14 0.037(3) 0.034(3) 0.058(3) -0.005(2) 0.017(2) 0.005(2)
C15 0.055(4) 0.061(4) 0.053(3) -0.005(3) 0.011(3) 0.011(3)
C16 0.074(5) 0.084(5) 0.073(4) 0.007(4) 0.005(4) 0.041(4)
C17 0.069(5) 0.074(5) 0.106(6) -0.008(4) 0.019(4) 0.031(4)
C18 0.060(4) 0.063(4) 0.087(4) -0.012(3) 0.035(4) 0.016(3)
C19 0.041(3) 0.044(3) 0.058(3) -0.008(2) 0.016(3) 0.000(2)
C20 0.039(3) 0.035(2) 0.040(2) -0.0020(19) 0.019(2) 0.002(2)
C21 0.042(3) 0.036(2) 0.040(2) -0.004(2) 0.021(2) -0.002(2)
C22 0.065(4) 0.053(3) 0.038(2) -0.001(2) 0.027(3) 0.012(3)
C23 0.075(4) 0.072(4) 0.034(3) 0.007(3) 0.026(3) 0.012(3)
C24 0.064(4) 0.067(4) 0.043(3) 0.012(3) 0.015(3) 0.028(3)
C25 0.053(3) 0.053(3) 0.043(3) 0.006(2) 0.020(2) 0.019(3)
C26 0.043(3) 0.037(2) 0.036(2) 0.001(2) 0.018(2) 0.000(2)
C27 0.070(4) 0.071(4) 0.040(3) -0.011(3) 0.024(3) -0.024(3)
C28 0.073(4) 0.076(4) 0.049(3) -0.020(3) 0.017(3) -0.032(3)
C29 0.042(3) 0.051(3) 0.057(3) -0.009(3) 0.017(3) -0.009(2)
C30 0.082(5) 0.077(4) 0.055(3) -0.002(3) 0.024(3) -0.032(4)
C31 0.073(4) 0.075(4) 0.041(3) -0.006(3) 0.022(3) -0.029(3)
C32 0.059(4) 0.059(4) 0.079(4) -0.007(3) 0.025(3) -0.010(3)
C33 0.041(3) 0.050(3) 0.040(2) 0.003(2) 0.022(2) 0.002(2)
C34 0.048(3) 0.052(3) 0.062(3) -0.003(3) 0.018(3) -0.004(3)
C35 0.037(3) 0.083(5) 0.075(4) 0.018(3) 0.022(3) -0.002(3)
C36 0.050(4) 0.090(5) 0.081(4) 0.014(4) 0.038(3) 0.017(3)
C37 0.062(4) 0.067(4) 0.081(4) 0.003(3) 0.041(4) 0.018(3)
C38 0.051(3) 0.053(3) 0.051(3) 0.003(2) 0.027(3) 0.003(3)
C39 0.044(3) 0.044(3) 0.046(3) -0.012(2) 0.015(2) 0.001(2)
C40 0.043(3) 0.046(3) 0.058(3) -0.007(2) 0.015(3) -0.001(2)
C41 0.052(4) 0.056(4) 0.100(5) -0.030(3) 0.017(4) -0.010(3)
C42 0.062(5) 0.071(5) 0.133(7) -0.041(5) 0.013(5) -0.031(4)
C43 0.047(4) 0.067(4) 0.126(6) -0.002(4) 0.023(4) -0.015(3)
C44 0.041(3) 0.063(4) 0.074(4) 0.000(3) 0.021(3) 0.006(3)
C45 0.034(3) 0.046(3) 0.047(3) 0.002(2) 0.012(2) 0.001(2)
C46 0.041(3) 0.041(3) 0.046(3) -0.005(2) 0.016(2) 0.004(2)
C47 0.059(4) 0.058(3) 0.050(3) 0.002(3) 0.014(3) 0.017(3)
C48 0.060(4) 0.067(4) 0.066(4) 0.002(3) 0.004(3) 0.023(3)
C49 0.053(4) 0.061(4) 0.083(4) -0.007(3) 0.021(3) 0.023(3)
C50 0.055(4) 0.056(3) 0.070(4) -0.010(3) 0.030(3) 0.015(3)
C51 0.044(3) 0.041(3) 0.052(3) -0.003(2) 0.020(2) 0.001(2)
C52 0.041(3) 0.043(3) 0.042(2) 0.001(2) 0.021(2) 0.004(2)
C53 0.047(3) 0.037(3) 0.043(3) 0.004(2) 0.021(2) 0.003(2)
C54 0.074(4) 0.059(3) 0.047(3) 0.008(3) 0.032(3) 0.012(3)
C55 0.087(5) 0.065(4) 0.040(3) 0.015(3) 0.021(3) 0.019(3)
C56 0.075(4) 0.083(5) 0.053(3) 0.025(3) 0.021(3) 0.028(4)
C57 0.056(4) 0.059(3) 0.052(3) 0.012(3) 0.024(3) 0.021(3)
C58 0.041(3) 0.035(2) 0.045(3) 0.003(2) 0.019(2) 0.001(2)
C59 0.065(4) 0.059(3) 0.053(3) -0.007(3) 0.032(3) -0.016(3)
C60 0.087(5) 0.076(4) 0.076(4) -0.028(3) 0.042(4) -0.031(4)
C61 0.073(4) 0.047(3) 0.096(5) -0.006(3) 0.049(4) -0.008(3)
C62 0.104(6) 0.066(4) 0.077(4) 0.000(3) 0.057(4) -0.023(4)
C63 0.083(4) 0.060(4) 0.056(3) -0.008(3) 0.041(3) -0.021(3)
C64 0.099(7) 0.072(5) 0.145(7) -0.015(5) 0.074(6) -0.023(5)
O5 0.094(7) 0.131(9) 0.249(13) -0.138(9) -0.084(8) 0.080(7)
O6 0.170(12) 0.265(16) 0.193(13) 0.033(11) 0.139(11) 0.081(11)
O7 0.26(2) 0.39(3) 0.27(2) -0.12(2) 0.21(2) -0.23(2)

_geom_special_details            
; 
 All esds (except the esd in the dihedral angle between two l.s. planes) 
 are estimated using the full covariance matrix.  The cell esds are taken 
 into account individually in the estimation of esds in distances, angles 
 and torsion angles; correlations between esds in cell parameters are only 
 used when they are defined by crystal symmetry.  An approximate (isotropic) 
 treatment of cell esds is used for estimating esds involving l.s. planes. 
;

loop_
_geom_bond_atom_site_label_1
_geom_bond_atom_site_label_2
_geom_bond_distance
_geom_bond_site_symmetry_2
_geom_bond_publ_flag
Ir1 C13 2.030(4) . ?
Ir1 N2 2.049(4) . ?
Ir1 C26 2.049(4) . ?
Ir1 N1 2.052(4) . ?
Ir1 N3 2.182(4) . ?
Ir1 Cl1 2.4476(11) . ?
Ir2 C45 2.028(5) . ?
Ir2 C58 2.037(5) . ?
Ir2 N6 2.051(4) . ?
Ir2 N5 2.056(4) . ?
Ir2 N7 2.153(4) . ?
Ir2 Cl2 2.4206(12) . ?
F1 C10 1.353(6) . ?
F2 C12 1.362(6) . ?
F3 C23 1.342(5) . ?
F4 C25 1.357(5) . ?
F5 C42 1.352(7) . ?
F6 C44 1.347(6) . ?
F7 C55 1.355(6) . ?
F8 C57 1.360(6) . ?
O1 C7 1.358(5) . ?
O1 C6 1.382(6) . ?
O2 C20 1.340(5) . ?
O2 C19 1.381(6) . ?
O3 C39 1.345(6) . ?
O3 C38 1.396(6) . ?
O4 C52 1.353(5) . ?
O4 C51 1.387(6) . ?
N1 C7 1.298(6) . ?
N1 C1 1.402(6) . ?
N2 C20 1.300(5) . ?
N2 C14 1.387(6) . ?
N3 C27 1.323(6) . ?
N3 C31 1.335(6) . ?
N4 C32 1.141(7) . ?
N5 C39 1.297(6) . ?
N5 C33 1.411(6) . ?
N6 C52 1.298(6) . ?
N6 C46 1.402(6) . ?
N7 C59 1.318(6) . ?
N7 C63 1.334(6) . ?
N8 N8' 0.53(8) . ?
N8 C64 1.18(2) . ?
N8' C64 1.07(5) . ?
C1 C6 1.376(7) . ?
C1 C2 1.393(7) . ?
C2 C3 1.385(7) . ?
C2 H2A 0.9300 . ?
C3 C4 1.391(8) . ?
C3 H3A 0.9300 . ?
C4 C5 1.377(8) . ?
C4 H4A 0.9300 . ?
C5 C6 1.375(7) . ?
C5 H5A 0.9300 . ?
C7 C8 1.420(6) . ?
C8 C9 1.404(6) . ?
C8 C13 1.422(6) . ?
C9 C10 1.373(7) . ?
C9 H9A 0.9300 . ?
C10 C11 1.362(8) . ?
C11 C12 1.384(7) . ?
C11 H11A 0.9300 . ?
C12 C13 1.382(6) . ?
C14 C15 1.366(7) . ?
C14 C19 1.394(7) . ?
C15 C16 1.387(8) . ?
C15 H15A 0.9300 . ?
C16 C17 1.391(9) . ?
C16 H16A 0.9300 . ?
C17 C18 1.377(9) . ?
C17 H17A 0.9300 . ?
C18 C19 1.370(7) . ?
C18 H18A 0.9300 . ?
C20 C21 1.436(6) . ?
C21 C22 1.396(6) . ?
C21 C26 1.421(6) . ?
C22 C23 1.372(7) . ?
C22 H22A 0.9300 . ?
C23 C24 1.367(7) . ?
C24 C25 1.393(7) . ?
C24 H24A 0.9300 . ?
C25 C26 1.376(7) . ?
C27 C28 1.380(7) . ?
C27 H27A 0.9300 . ?
C28 C29 1.358(7) . ?
C28 H28A 0.9300 . ?
C29 C30 1.362(7) . ?
C29 C32 1.466(8) . ?
C30 C31 1.381(8) . ?
C30 H30A 0.9300 . ?
C31 H31A 0.9300 . ?
C33 C34 1.362(7) . ?
C33 C38 1.394(7) . ?
C34 C35 1.385(7) . ?
C34 H34A 0.9300 . ?
C35 C36 1.387(8) . ?
C35 H35A 0.9300 . ?
C36 C37 1.358(9) . ?
C36 H36A 0.9300 . ?
C37 C38 1.355(7) . ?
C37 H37A 0.9300 . ?
C39 C40 1.417(7) . ?
C40 C41 1.385(7) . ?
C40 C45 1.426(7) . ?
C41 C42 1.372(9) . ?
C41 H41A 0.9300 . ?
C42 C43 1.360(9) . ?
C43 C44 1.387(8) . ?
C43 H43A 0.9300 . ?
C44 C45 1.379(7) . ?
C46 C47 1.385(7) . ?
C46 C51 1.403(6) . ?
C47 C48 1.393(7) . ?
C47 H47A 0.9300 . ?
C48 C49 1.392(8) . ?
C48 H48A 0.9300 . ?
C49 C50 1.374(8) . ?
C49 H49A 0.9300 . ?
C50 C51 1.354(7) . ?
C50 H50A 0.9300 . ?
C52 C53 1.445(6) . ?
C53 C58 1.394(6) . ?
C53 C54 1.411(7) . ?
C54 C55 1.369(8) . ?
C54 H54A 0.9300 . ?
C55 C56 1.366(8) . ?
C56 C57 1.368(7) . ?
C56 H56A 0.9300 . ?
C57 C58 1.400(7) . ?
C59 C60 1.380(8) . ?
C59 H59A 0.9300 . ?
C60 C61 1.365(8) . ?
C60 H60A 0.9300 . ?
C61 C62 1.355(9) . ?
C61 C64 1.461(9) . ?
C62 C63 1.379(8) . ?
C62 H62A 0.9300 . ?
C63 H63A 0.9300 . ?

loop_
_geom_angle_atom_site_label_1
_geom_angle_atom_site_label_2
_geom_angle_atom_site_label_3
_geom_angle
_geom_angle_site_symmetry_1
_geom_angle_site_symmetry_3
_geom_angle_publ_flag
C13 Ir1 N2 96.47(16) . . ?
C13 Ir1 C26 92.37(17) . . ?
N2 Ir1 C26 79.17(17) . . ?
C13 Ir1 N1 79.75(16) . . ?
N2 Ir1 N1 172.75(14) . . ?
C26 Ir1 N1 94.73(16) . . ?
C13 Ir1 N3 174.27(14) . . ?
N2 Ir1 N3 87.90(14) . . ?
C26 Ir1 N3 92.09(16) . . ?
N1 Ir1 N3 96.29(14) . . ?
C13 Ir1 Cl1 86.65(12) . . ?
N2 Ir1 Cl1 96.78(11) . . ?
C26 Ir1 Cl1 175.70(14) . . ?
N1 Ir1 Cl1 89.22(10) . . ?
N3 Ir1 Cl1 89.17(10) . . ?
C45 Ir2 C58 94.19(18) . . ?
C45 Ir2 N6 96.71(17) . . ?
C58 Ir2 N6 79.24(16) . . ?
C45 Ir2 N5 79.84(17) . . ?
C58 Ir2 N5 95.82(16) . . ?
N6 Ir2 N5 173.82(15) . . ?
C45 Ir2 N7 171.01(16) . . ?
C58 Ir2 N7 93.55(17) . . ?
N6 Ir2 N7 89.22(15) . . ?
N5 Ir2 N7 94.83(15) . . ?
C45 Ir2 Cl2 84.02(14) . . ?
C58 Ir2 Cl2 173.88(14) . . ?
N6 Ir2 Cl2 95.14(11) . . ?
N5 Ir2 Cl2 89.62(11) . . ?
N7 Ir2 Cl2 88.74(11) . . ?
C7 O1 C6 104.1(4) . . ?
C20 O2 C19 104.4(4) . . ?
C39 O3 C38 104.5(4) . . ?
C52 O4 C51 105.1(3) . . ?
C7 N1 C1 106.0(4) . . ?
C7 N1 Ir1 113.4(3) . . ?
C1 N1 Ir1 140.2(3) . . ?
C20 N2 C14 105.8(4) . . ?
C20 N2 Ir1 114.7(3) . . ?
C14 N2 Ir1 139.5(3) . . ?
C27 N3 C31 116.5(4) . . ?
C27 N3 Ir1 123.1(3) . . ?
C31 N3 Ir1 120.3(3) . . ?
C39 N5 C33 106.3(4) . . ?
C39 N5 Ir2 113.1(3) . . ?
C33 N5 Ir2 140.5(3) . . ?
C52 N6 C46 106.0(4) . . ?
C52 N6 Ir2 114.0(3) . . ?
C46 N6 Ir2 140.0(3) . . ?
C59 N7 C63 116.8(5) . . ?
C59 N7 Ir2 123.7(3) . . ?
C63 N7 Ir2 119.5(3) . . ?
N8' N8 C64 65(8) . . ?
N8 N8' C64 88(9) . . ?
C6 C1 C2 119.7(4) . . ?
C6 C1 N1 107.0(4) . . ?
C2 C1 N1 133.3(4) . . ?
C3 C2 C1 116.8(5) . . ?
C3 C2 H2A 121.6 . . ?
C1 C2 H2A 121.6 . . ?
C2 C3 C4 121.6(5) . . ?
C2 C3 H3A 119.2 . . ?
C4 C3 H3A 119.2 . . ?
C5 C4 C3 122.1(5) . . ?
C5 C4 H4A 118.9 . . ?
C3 C4 H4A 118.9 . . ?
C6 C5 C4 115.0(5) . . ?
C6 C5 H5A 122.5 . . ?
C4 C5 H5A 122.5 . . ?
C5 C6 C1 124.7(5) . . ?
C5 C6 O1 126.4(5) . . ?
C1 C6 O1 108.8(4) . . ?
N1 C7 O1 114.2(4) . . ?
N1 C7 C8 120.9(4) . . ?
O1 C7 C8 124.8(4) . . ?
C9 C8 C7 123.9(4) . . ?
C9 C8 C13 124.6(4) . . ?
C7 C8 C13 111.5(4) . . ?
C10 C9 C8 116.7(5) . . ?
C10 C9 H9A 121.6 . . ?
C8 C9 H9A 121.6 . . ?
F1 C10 C11 118.8(5) . . ?
F1 C10 C9 119.2(5) . . ?
C11 C10 C9 122.0(5) . . ?
C10 C11 C12 119.1(5) . . ?
C10 C11 H11A 120.4 . . ?
C12 C11 H11A 120.4 . . ?
F2 C12 C13 118.7(4) . . ?
F2 C12 C11 116.8(5) . . ?
C13 C12 C11 124.5(5) . . ?
C12 C13 C8 113.1(4) . . ?
C12 C13 Ir1 132.3(4) . . ?
C8 C13 Ir1 114.4(3) . . ?
C15 C14 N2 132.8(5) . . ?
C15 C14 C19 120.2(5) . . ?
N2 C14 C19 106.9(4) . . ?
C14 C15 C16 117.3(5) . . ?
C14 C15 H15A 121.3 . . ?
C16 C15 H15A 121.3 . . ?
C15 C16 C17 121.3(6) . . ?
C15 C16 H16A 119.3 . . ?
C17 C16 H16A 119.3 . . ?
C18 C17 C16 122.0(6) . . ?
C18 C17 H17A 119.0 . . ?
C16 C17 H17A 119.0 . . ?
C19 C18 C17 115.4(6) . . ?
C19 C18 H18A 122.3 . . ?
C17 C18 H18A 122.3 . . ?
C18 C19 O2 128.3(5) . . ?
C18 C19 C14 123.7(5) . . ?
O2 C19 C14 108.0(4) . . ?
N2 C20 O2 114.9(4) . . ?
N2 C20 C21 120.1(4) . . ?
O2 C20 C21 125.0(4) . . ?
C22 C21 C26 123.7(4) . . ?
C22 C21 C20 125.0(4) . . ?
C26 C21 C20 111.3(4) . . ?
C23 C22 C21 117.4(4) . . ?
C23 C22 H22A 121.3 . . ?
C21 C22 H22A 121.3 . . ?
F3 C23 C24 118.2(5) . . ?
F3 C23 C22 119.2(5) . . ?
C24 C23 C22 122.5(5) . . ?
C23 C24 C25 117.8(5) . . ?
C23 C24 H24A 121.1 . . ?
C25 C24 H24A 121.1 . . ?
F4 C25 C26 120.2(4) . . ?
F4 C25 C24 115.1(4) . . ?
C26 C25 C24 124.7(5) . . ?
C25 C26 C21 113.9(4) . . ?
C25 C26 Ir1 131.4(3) . . ?
C21 C26 Ir1 114.6(3) . . ?
N3 C27 C28 123.9(5) . . ?
N3 C27 H27A 118.1 . . ?
C28 C27 H27A 118.1 . . ?
C29 C28 C27 118.9(5) . . ?
C29 C28 H28A 120.6 . . ?
C27 C28 H28A 120.6 . . ?
C28 C29 C30 118.4(5) . . ?
C28 C29 C32 119.6(5) . . ?
C30 C29 C32 122.0(5) . . ?
C29 C30 C31 119.6(5) . . ?
C29 C30 H30A 120.2 . . ?
C31 C30 H30A 120.2 . . ?
N3 C31 C30 122.7(5) . . ?
N3 C31 H31A 118.7 . . ?
C30 C31 H31A 118.7 . . ?
N4 C32 C29 177.8(7) . . ?
C34 C33 C38 119.2(5) . . ?
C34 C33 N5 134.5(5) . . ?
C38 C33 N5 106.2(4) . . ?
C33 C34 C35 117.1(5) . . ?
C33 C34 H34A 121.4 . . ?
C35 C34 H34A 121.4 . . ?
C34 C35 C36 121.8(6) . . ?
C34 C35 H35A 119.1 . . ?
C36 C35 H35A 119.1 . . ?
C37 C36 C35 121.5(6) . . ?
C37 C36 H36A 119.2 . . ?
C35 C36 H36A 119.2 . . ?
C38 C37 C36 115.9(6) . . ?
C38 C37 H37A 122.1 . . ?
C36 C37 H37A 122.1 . . ?
C37 C38 C33 124.5(5) . . ?
C37 C38 O3 127.3(5) . . ?
C33 C38 O3 108.2(4) . . ?
N5 C39 O3 114.7(5) . . ?
N5 C39 C40 121.0(4) . . ?
O3 C39 C40 124.3(4) . . ?
C41 C40 C39 124.2(5) . . ?
C41 C40 C45 124.1(5) . . ?
C39 C40 C45 111.7(4) . . ?
C42 C41 C40 116.7(6) . . ?
C42 C41 H41A 121.7 . . ?
C40 C41 H41A 121.7 . . ?
F5 C42 C43 118.1(7) . . ?
F5 C42 C41 118.4(7) . . ?
C43 C42 C41 123.4(6) . . ?
C42 C43 C44 117.4(6) . . ?
C42 C43 H43A 121.3 . . ?
C44 C43 H43A 121.3 . . ?
F6 C44 C45 119.4(5) . . ?
F6 C44 C43 115.8(5) . . ?
C45 C44 C43 124.8(6) . . ?
C44 C45 C40 113.5(5) . . ?
C44 C45 Ir2 132.0(4) . . ?
C40 C45 Ir2 113.9(4) . . ?
C47 C46 N6 133.0(4) . . ?
C47 C46 C51 119.8(5) . . ?
N6 C46 C51 107.2(4) . . ?
C46 C47 C48 115.9(5) . . ?
C46 C47 H47A 122.1 . . ?
C48 C47 H47A 122.1 . . ?
C49 C48 C47 122.3(6) . . ?
C49 C48 H48A 118.8 . . ?
C47 C48 H48A 118.8 . . ?
C50 C49 C48 122.0(5) . . ?
C50 C49 H49A 119.0 . . ?
C48 C49 H49A 119.0 . . ?
C51 C50 C49 115.3(5) . . ?
C51 C50 H50A 122.4 . . ?
C49 C50 H50A 122.4 . . ?
C50 C51 O4 127.9(5) . . ?
C50 C51 C46 124.7(5) . . ?
O4 C51 C46 107.3(4) . . ?
N6 C52 O4 114.4(4) . . ?
N6 C52 C53 120.0(4) . . ?
O4 C52 C53 125.5(4) . . ?
C58 C53 C54 125.5(5) . . ?
C58 C53 C52 111.3(4) . . ?
C54 C53 C52 123.2(4) . . ?
C55 C54 C53 115.7(5) . . ?
C55 C54 H54A 122.1 . . ?
C53 C54 H54A 122.1 . . ?
F7 C55 C56 118.9(5) . . ?
F7 C55 C54 117.9(5) . . ?
C56 C55 C54 123.2(5) . . ?
C55 C56 C57 117.6(5) . . ?
C55 C56 H56A 121.2 . . ?
C57 C56 H56A 121.2 . . ?
F8 C57 C56 115.6(5) . . ?
F8 C57 C58 118.9(4) . . ?
C56 C57 C58 125.5(5) . . ?
C53 C58 C57 112.4(4) . . ?
C53 C58 Ir2 115.4(3) . . ?
C57 C58 Ir2 132.1(4) . . ?
N7 C59 C60 123.5(5) . . ?
N7 C59 H59A 118.2 . . ?
C60 C59 H59A 118.2 . . ?
C61 C60 C59 118.7(6) . . ?
C61 C60 H60A 120.6 . . ?
C59 C60 H60A 120.6 . . ?
C62 C61 C60 118.7(6) . . ?
C62 C61 C64 121.4(6) . . ?
C60 C61 C64 119.8(6) . . ?
C61 C62 C63 119.2(6) . . ?
C61 C62 H62A 120.4 . . ?
C63 C62 H62A 120.4 . . ?
N7 C63 C62 123.0(5) . . ?
N7 C63 H63A 118.5 . . ?
C62 C63 H63A 118.5 . . ?
N8' C64 N8 27(4) . . ?
N8' C64 C61 159(4) . . ?
N8 C64 C61 173.7(16) . . ?

_diffrn_measured_fraction_theta_max 0.996
_diffrn_reflns_theta_full        26.03
_diffrn_measured_fraction_theta_full 0.996
_refine_diff_density_max         1.448
_refine_diff_density_min         -1.301
_refine_diff_density_rms         0.116
