# Supplementary material
Source: MDPI journal article supplement (https://www.mdpi.com/2304-6740/6/4/118)
Supplement: s1 [file s1 › inorganics-371116-supplementary/8. 4m.cif]

 
data_4m 
  
_audit_creation_method           SHELXL-97 
_chemical_name_systematic        ? 
_chemical_name_common            ? 
_chemical_formula_moiety         'C32 H19 F4 I Ir N3 O2, 0.5(C6 H14)' 
_chemical_formula_sum            'C35 H26 F4 I Ir N3 O2' 
_chemical_melting_point          ? 
  
_exptl_crystal_description       parallelepiped 
_exptl_crystal_colour            yellow 
  
_diffrn_ambient_temperature      110(2) 
_chemical_formula_weight         915.69 
  
loop_ 
_atom_type_symbol 
_atom_type_description 
_atom_type_scat_dispersion_real 
_atom_type_scat_dispersion_imag 
_atom_type_scat_source 
C C 0.0033 0.0016 'International Tables Vol C Tables 4.2.6.8 and 6.1.1.4' 
H H 0.0000 0.0000 'International Tables Vol C Tables 4.2.6.8 and 6.1.1.4' 
N N 0.0061 0.0033 'International Tables Vol C Tables 4.2.6.8 and 6.1.1.4' 
O O 0.0106 0.0060 'International Tables Vol C Tables 4.2.6.8 and 6.1.1.4' 
F F 0.0171 0.0103 'International Tables Vol C Tables 4.2.6.8 and 6.1.1.4' 
I I -0.4742 1.8119 'International Tables Vol C Tables 4.2.6.8 and 6.1.1.4' 
Ir Ir -1.4442 7.9887 'International Tables Vol C Tables 4.2.6.8 and 6.1.1.4' 
  
_symmetry_cell_setting           triclinic 
_symmetry_space_group_name_H-M   'P -1' 
_symmetry_int_tables_number      2 
_chemical_absolute_configuration ? 
  
loop_ 
_symmetry_equiv_pos_as_xyz 
'x, y, z' 
'-x, -y, -z' 
  
_cell_length_a                   8.5721(2) 
_cell_length_b                   10.9433(3) 
_cell_length_c                   16.9964(6) 
_cell_angle_alpha                95.019(2) 
_cell_angle_beta                 97.165(2) 
_cell_angle_gamma                91.412(2) 
_cell_volume                     1574.85(8) 
_cell_formula_units_Z            2 
_cell_measurement_temperature    110(2) 
_cell_measurement_reflns_used    10475 
_cell_measurement_theta_min      2.9187 
_cell_measurement_theta_max      29.1379 
_exptl_crystal_size_max          0.75 
_exptl_crystal_size_mid          0.60 
_exptl_crystal_size_min          0.40 
_exptl_crystal_density_meas      ? 
_exptl_crystal_density_diffrn    1.931 
_exptl_crystal_density_method    'not measured' 
_exptl_crystal_F_000             878 
_exptl_absorpt_coefficient_mu    5.280 
_exptl_absorpt_correction_type   multi-scan 
_exptl_absorpt_correction_T_min  0.46841 
_exptl_absorpt_correction_T_max  1.00000 
_exptl_absorpt_process_details 
; 
CrysAlisPro, Oxford Diffraction Ltd., 
Version 1.171.33.66 (release 28-04-2010 CrysAlis171 .NET) 
(compiled Apr 28 2010,14:27:37) 
Empirical absorption correction using spherical harmonics, 
 implemented in SCALE3 ABSPACK scaling algorithm. 
; 
  
_exptl_special_details 
; 
 ? 
; 
_diffrn_radiation_probe          x-ray 
_diffrn_radiation_type           MoK\a 
_diffrn_radiation_wavelength     0.71073 
_diffrn_source                   'fine-focus sealed tube' 
_diffrn_radiation_monochromator  graphite 
_diffrn_measurement_device_type  'CCD detector' 
_diffrn_measurement_method       '\w scans' 
_diffrn_detector_area_resol_mean ? 
_diffrn_reflns_number            14010 
_diffrn_reflns_av_R_equivalents  0.0229 
_diffrn_reflns_av_sigmaI/netI    0.0388 
_diffrn_reflns_limit_h_min       -10 
_diffrn_reflns_limit_h_max       11 
_diffrn_reflns_limit_k_min       -14 
_diffrn_reflns_limit_k_max       14 
_diffrn_reflns_limit_l_min       -22 
_diffrn_reflns_limit_l_max       21 
_diffrn_reflns_theta_min         2.92 
_diffrn_reflns_theta_max         29.20 
_reflns_number_total             7249 
_reflns_number_gt                6292 
_reflns_threshold_expression     >2sigma(I) 
  
_computing_data_collection 
; 
CrysAlis CCD, Oxford Diffraction Ltd., 
Version 1.171.32.29 (release 10-06-2008 CrysAlis171 .NET) 
(compiled Jun 10 2008,16:49:55) 
; 
_computing_cell_refinement 
; 
CrysAlis RED, Oxford Diffraction Ltd., 
Version 1.171.32.29 (release 10-06-2008 CrysAlis171 .NET) 
(compiled Jun 10 2008,16:49:55) 
; 
_computing_data_reduction 
; 
CrysAlis RED, Oxford Diffraction Ltd., 
Version 1.171.32.29 (release 10-06-2008 CrysAlis171 .NET) 
(compiled Jun 10 2008,16:49:55) 
; 
_computing_structure_solution    'SHELXS-97 (Sheldrick, 2008)' 
_computing_structure_refinement  'SHELXL-97 (Sheldrick, 2008)' 
_computing_molecular_graphics    'Bruker SHELXTL' 
_computing_publication_material  'Bruker SHELXTL' 
  
_refine_special_details 
; 
 Refinement of F^2^ against ALL reflections.  The weighted R-factor wR and 
 goodness of fit S are based on F^2^, conventional R-factors R are based 
 on F, with F set to zero for negative F^2^. The threshold expression of 
 F^2^ > 2sigma(F^2^) is used only for calculating R-factors(gt) etc. and is 
 not relevant to the choice of reflections for refinement.  R-factors based 
 on F^2^ are statistically about twice as large as those based on F, and R- 
 factors based on ALL data will be even larger. 
; 
  
_refine_ls_structure_factor_coef Fsqd 
_refine_ls_matrix_type           full 
_refine_ls_weighting_scheme      calc 
_refine_ls_weighting_details 
'calc w=1/[\s^2^(Fo^2^)+(0.0369P)^2^+3.3195P] where P=(Fo^2^+2Fc^2^)/3' 
_atom_sites_solution_primary     direct 
_atom_sites_solution_secondary   difmap 
_atom_sites_solution_hydrogens   geom 
_refine_ls_hydrogen_treatment    constr 
_refine_ls_extinction_method     none 
_refine_ls_extinction_coef       ? 
_refine_ls_number_reflns         7249 
_refine_ls_number_parameters     409 
_refine_ls_number_restraints     0 
_refine_ls_R_factor_all          0.0401 
_refine_ls_R_factor_gt           0.0317 
_refine_ls_wR_factor_ref         0.0723 
_refine_ls_wR_factor_gt          0.0703 
_refine_ls_goodness_of_fit_ref   1.030 
_refine_ls_restrained_S_all      1.030 
_refine_ls_shift/su_max          0.001 
_refine_ls_shift/su_mean         0.000 
  
loop_ 
_atom_site_label 
_atom_site_type_symbol 
_atom_site_fract_x 
_atom_site_fract_y 
_atom_site_fract_z 
_atom_site_U_iso_or_equiv 
_atom_site_adp_type 
_atom_site_occupancy 
_atom_site_symmetry_multiplicity 
_atom_site_calc_flag 
_atom_site_refinement_flags 
_atom_site_disorder_assembly 
_atom_site_disorder_group 
Ir Ir -0.46459(2) 0.703358(15) 0.280810(10) 0.01076(5) Uani 1 1 d . . . 
I I -0.27309(4) 0.78997(3) 0.178662(18) 0.01721(7) Uani 1 1 d . . . 
F1 F -0.8270(3) 0.5342(3) 0.54763(16) 0.0216(6) Uani 1 1 d . . . 
F2 F -0.8358(3) 0.5750(3) 0.27590(17) 0.0232(6) Uani 1 1 d . . . 
F3 F -0.8039(4) 1.1969(3) 0.29625(19) 0.0303(7) Uani 1 1 d . . . 
F4 F -0.4095(3) 0.9604(3) 0.41342(18) 0.0252(7) Uani 1 1 d . . . 
O1 O -0.2753(4) 0.7190(3) 0.51545(18) 0.0137(6) Uani 1 1 d . . . 
O2 O -0.8206(4) 0.7871(3) 0.1116(2) 0.0232(8) Uani 1 1 d . . . 
N1 N -0.3091(4) 0.7274(3) 0.3836(2) 0.0107(7) Uani 1 1 d . . . 
N2 N -0.6340(4) 0.6909(3) 0.1837(2) 0.0124(7) Uani 1 1 d . . . 
N3 N -0.3762(4) 0.5212(3) 0.2636(2) 0.0119(7) Uani 1 1 d . . . 
C1 C -0.1581(5) 0.7750(4) 0.4126(3) 0.0125(9) Uani 1 1 d . . . 
C2 C -0.0372(5) 0.8248(4) 0.3765(3) 0.0173(10) Uani 1 1 d . . . 
H2A H -0.0469 0.8309 0.3207 0.021 Uiso 1 1 calc R . . 
C3 C 0.0981(5) 0.8650(4) 0.4264(3) 0.0214(11) Uani 1 1 d . . . 
H3A H 0.1827 0.9000 0.4037 0.026 Uiso 1 1 calc R . . 
C4 C 0.1154(5) 0.8563(4) 0.5079(3) 0.0216(10) Uani 1 1 d . . . 
H4A H 0.2110 0.8847 0.5393 0.026 Uiso 1 1 calc R . . 
C5 C -0.0035(5) 0.8071(4) 0.5443(3) 0.0189(10) Uani 1 1 d . . . 
H5A H 0.0062 0.8007 0.6001 0.023 Uiso 1 1 calc R . . 
C6 C -0.1371(5) 0.7678(4) 0.4942(3) 0.0140(9) Uani 1 1 d . . . 
C7 C -0.3709(5) 0.6996(4) 0.4464(3) 0.0114(8) Uani 1 1 d . . . 
C8 C -0.5303(5) 0.6529(4) 0.4394(3) 0.0136(9) Uani 1 1 d . . . 
C9 C -0.6030(5) 0.6187(4) 0.5040(3) 0.0146(9) Uani 1 1 d . . . 
H9A H -0.5506 0.6285 0.5569 0.018 Uiso 1 1 calc R . . 
C10 C -0.7533(5) 0.5706(4) 0.4868(3) 0.0162(9) Uani 1 1 d . . . 
C11 C -0.8320(5) 0.5542(4) 0.4112(3) 0.0168(9) Uani 1 1 d . . . 
H11A H -0.9353 0.5183 0.4011 0.020 Uiso 1 1 calc R . . 
C12 C -0.7546(5) 0.5924(4) 0.3497(3) 0.0144(6) Uani 1 1 d . . . 
C13 C -0.6033(5) 0.6430(4) 0.3603(3) 0.0144(6) Uani 1 1 d . . . 
C14 C -0.6789(5) 0.6165(4) 0.1125(3) 0.0160(9) Uani 1 1 d . . . 
C15 C -0.6283(6) 0.5052(4) 0.0819(3) 0.0192(10) Uani 1 1 d . . . 
H15A H -0.5492 0.4619 0.1110 0.023 Uiso 1 1 calc R . . 
C16 C -0.6985(6) 0.4598(5) 0.0068(3) 0.0241(11) Uani 1 1 d . . . 
H16A H -0.6667 0.3835 -0.0160 0.029 Uiso 1 1 calc R . . 
C17 C -0.8148(6) 0.5231(5) -0.0364(3) 0.0283(12) Uani 1 1 d . . . 
H17A H -0.8600 0.4889 -0.0877 0.034 Uiso 1 1 calc R . . 
C18 C -0.8657(6) 0.6348(5) -0.0060(3) 0.0280(12) Uani 1 1 d . . . 
H18A H -0.9444 0.6788 -0.0348 0.034 Uiso 1 1 calc R . . 
C19 C -0.7946(6) 0.6776(4) 0.0688(3) 0.0205(10) Uani 1 1 d . . . 
C20 C -0.7183(5) 0.7888(4) 0.1783(3) 0.0161(9) Uani 1 1 d . . . 
C21 C -0.6901(5) 0.8901(4) 0.2388(3) 0.0158(9) Uani 1 1 d . . . 
C22 C -0.7772(6) 0.9963(4) 0.2374(3) 0.0222(10) Uani 1 1 d . . . 
H22A H -0.8648 1.0042 0.1983 0.027 Uiso 1 1 calc R . . 
C23 C -0.7286(6) 1.0888(4) 0.2961(3) 0.0195(10) Uani 1 1 d . . . 
C24 C -0.6059(5) 1.0770(4) 0.3548(3) 0.0181(10) Uani 1 1 d . . . 
H24A H -0.5754 1.1419 0.3951 0.022 Uiso 1 1 calc R . . 
C25 C -0.5281(5) 0.9676(4) 0.3534(3) 0.0156(9) Uani 1 1 d . . . 
C26 C -0.5620(5) 0.8700(4) 0.2952(3) 0.0145(9) Uani 1 1 d . . . 
C27 C -0.4744(5) 0.4227(4) 0.2578(3) 0.0154(9) Uani 1 1 d . . . 
H27A H -0.5828 0.4348 0.2610 0.018 Uiso 1 1 calc R . . 
C28 C -0.4237(6) 0.3037(4) 0.2473(3) 0.0205(10) Uani 1 1 d . . . 
H28A H -0.4976 0.2365 0.2428 0.025 Uiso 1 1 calc R . . 
C29 C -0.2677(6) 0.2820(4) 0.2433(3) 0.0202(10) Uani 1 1 d . . . 
C30 C -0.1656(6) 0.3848(4) 0.2512(3) 0.0201(10) Uani 1 1 d . . . 
H30A H -0.0562 0.3752 0.2494 0.024 Uiso 1 1 calc R . . 
C31 C -0.2245(5) 0.5010(4) 0.2618(3) 0.0147(9) Uani 1 1 d . . . 
H31A H -0.1528 0.5698 0.2680 0.018 Uiso 1 1 calc R . . 
C32 C -0.2122(7) 0.1540(5) 0.2301(4) 0.0358(14) Uani 1 1 d . . . 
H32A H -0.0984 0.1567 0.2283 0.054 Uiso 1 1 calc R . . 
H32B H -0.2659 0.1147 0.1796 0.054 Uiso 1 1 calc R . . 
H32C H -0.2361 0.1069 0.2739 0.054 Uiso 1 1 calc R . . 
C33 C -0.4116(8) -0.0051(6) 0.0001(4) 0.0409(15) Uani 1 1 d . . . 
H33A H -0.3633 -0.0192 0.0544 0.049 Uiso 1 1 calc R . . 
H33B H -0.3673 0.0737 -0.0134 0.049 Uiso 1 1 calc R . . 
C34 C -0.3678(9) -0.1065(7) -0.0575(4) 0.0507(18) Uani 1 1 d . . . 
H34A H -0.4229 -0.1836 -0.0484 0.061 Uiso 1 1 calc R . . 
H34B H -0.4052 -0.0872 -0.1124 0.061 Uiso 1 1 calc R . . 
C35 C -0.1948(10) -0.1270(8) -0.0511(5) 0.063(2) Uani 1 1 d . . . 
H35A H -0.1747 -0.1942 -0.0901 0.095 Uiso 1 1 calc R . . 
H35B H -0.1570 -0.1481 0.0027 0.095 Uiso 1 1 calc R . . 
H35C H -0.1393 -0.0519 -0.0616 0.095 Uiso 1 1 calc R . . 
  
loop_ 
_atom_site_aniso_label 
_atom_site_aniso_U_11 
_atom_site_aniso_U_22 
_atom_site_aniso_U_33 
_atom_site_aniso_U_23 
_atom_site_aniso_U_13 
_atom_site_aniso_U_12 
Ir 0.01276(9) 0.00727(8) 0.01274(9) 0.00097(6) 0.00358(6) 0.00008(6) 
I 0.02363(16) 0.01258(14) 0.01723(15) 0.00252(12) 0.00920(12) -0.00102(12) 
F1 0.0193(14) 0.0270(15) 0.0217(15) 0.0096(12) 0.0108(12) -0.0031(12) 
F2 0.0158(14) 0.0331(16) 0.0197(15) 0.0045(13) -0.0009(11) -0.0081(12) 
F3 0.0381(18) 0.0149(14) 0.0411(19) 0.0054(13) 0.0122(15) 0.0163(13) 
F4 0.0210(15) 0.0164(14) 0.0342(17) -0.0096(13) -0.0048(13) 0.0032(11) 
O1 0.0139(15) 0.0144(15) 0.0123(15) -0.0006(13) 0.0014(12) -0.0005(12) 
O2 0.0302(19) 0.0207(18) 0.0183(17) 0.0037(14) -0.0008(15) 0.0090(15) 
N1 0.0126(17) 0.0055(16) 0.0143(18) 0.0011(14) 0.0030(15) -0.0019(13) 
N2 0.0130(18) 0.0130(18) 0.0119(18) 0.0021(15) 0.0037(15) 0.0007(14) 
N3 0.0154(18) 0.0085(16) 0.0122(18) 0.0020(14) 0.0032(15) 0.0012(14) 
C1 0.010(2) 0.0065(18) 0.021(2) -0.0017(17) 0.0017(17) 0.0002(15) 
C2 0.018(2) 0.012(2) 0.022(2) 0.0026(19) 0.0064(19) -0.0037(18) 
C3 0.013(2) 0.014(2) 0.038(3) 0.001(2) 0.007(2) -0.0006(18) 
C4 0.012(2) 0.015(2) 0.036(3) -0.004(2) -0.002(2) -0.0017(18) 
C5 0.016(2) 0.017(2) 0.021(2) -0.0050(19) -0.0030(19) 0.0003(18) 
C6 0.011(2) 0.012(2) 0.020(2) -0.0002(18) 0.0038(18) 0.0004(16) 
C7 0.013(2) 0.0069(18) 0.014(2) -0.0015(16) 0.0001(17) 0.0001(16) 
C8 0.012(2) 0.010(2) 0.019(2) -0.0004(17) 0.0037(18) 0.0007(16) 
C9 0.016(2) 0.016(2) 0.014(2) 0.0041(18) 0.0048(18) 0.0037(18) 
C10 0.016(2) 0.012(2) 0.023(2) 0.0059(19) 0.0120(19) 0.0034(17) 
C11 0.012(2) 0.016(2) 0.024(3) 0.0030(19) 0.0059(19) -0.0027(17) 
C12 0.0180(15) 0.0080(14) 0.0167(16) 0.0019(12) -0.0004(13) 0.0045(12) 
C13 0.0180(15) 0.0080(14) 0.0167(16) 0.0019(12) -0.0004(13) 0.0045(12) 
C14 0.021(2) 0.014(2) 0.014(2) 0.0025(18) 0.0052(19) -0.0007(18) 
C15 0.020(2) 0.017(2) 0.019(2) -0.0005(19) 0.002(2) -0.0031(19) 
C16 0.030(3) 0.022(2) 0.020(3) -0.004(2) 0.006(2) -0.003(2) 
C17 0.032(3) 0.032(3) 0.018(3) -0.003(2) 0.000(2) -0.005(2) 
C18 0.028(3) 0.034(3) 0.020(3) 0.002(2) -0.003(2) 0.000(2) 
C19 0.023(2) 0.020(2) 0.019(2) 0.003(2) 0.003(2) 0.003(2) 
C20 0.017(2) 0.018(2) 0.015(2) 0.0063(18) 0.0016(18) 0.0024(18) 
C21 0.016(2) 0.013(2) 0.020(2) 0.0047(18) 0.0066(19) -0.0003(17) 
C22 0.025(3) 0.020(2) 0.024(3) 0.007(2) 0.006(2) 0.007(2) 
C23 0.022(2) 0.011(2) 0.029(3) 0.0049(19) 0.014(2) 0.0112(18) 
C24 0.016(2) 0.009(2) 0.031(3) 0.0002(19) 0.011(2) 0.0015(17) 
C25 0.012(2) 0.013(2) 0.022(2) 0.0005(19) 0.0052(18) -0.0003(17) 
C26 0.015(2) 0.012(2) 0.018(2) 0.0010(18) 0.0089(18) 0.0006(17) 
C27 0.015(2) 0.015(2) 0.017(2) 0.0031(18) 0.0035(18) -0.0005(17) 
C28 0.029(3) 0.011(2) 0.021(2) 0.0022(19) 0.002(2) -0.0048(19) 
C29 0.026(3) 0.012(2) 0.022(3) 0.0000(19) -0.002(2) 0.0038(19) 
C30 0.018(2) 0.015(2) 0.026(3) -0.001(2) -0.001(2) 0.0043(18) 
C31 0.014(2) 0.013(2) 0.016(2) -0.0001(18) 0.0010(18) -0.0021(17) 
C32 0.038(3) 0.012(2) 0.054(4) -0.005(3) -0.004(3) 0.005(2) 
C33 0.057(4) 0.033(3) 0.035(3) 0.015(3) 0.003(3) 0.007(3) 
C34 0.068(5) 0.050(4) 0.038(4) 0.018(3) 0.011(3) 0.014(4) 
C35 0.078(6) 0.074(6) 0.048(4) 0.032(4) 0.020(4) 0.036(5) 
  
_geom_special_details 
; 
 All esds (except the esd in the dihedral angle between two l.s. planes) 
 are estimated using the full covariance matrix.  The cell esds are taken 
 into account individually in the estimation of esds in distances, angles 
 and torsion angles; correlations between esds in cell parameters are only 
 used when they are defined by crystal symmetry.  An approximate (isotropic) 
 treatment of cell esds is used for estimating esds involving l.s. planes. 
; 
  
loop_ 
_geom_bond_atom_site_label_1 
_geom_bond_atom_site_label_2 
_geom_bond_distance 
_geom_bond_site_symmetry_2 
_geom_bond_publ_flag 
Ir C26 2.033(4) . ? 
Ir C13 2.048(5) . ? 
Ir N2 2.051(4) . ? 
Ir N1 2.054(4) . ? 
Ir N3 2.159(3) . ? 
Ir I 2.7440(3) . ? 
F1 C10 1.360(5) . ? 
F2 C12 1.352(5) . ? 
F3 C23 1.361(5) . ? 
F4 C25 1.356(5) . ? 
O1 C7 1.342(5) . ? 
O1 C6 1.388(5) . ? 
O2 C20 1.342(6) . ? 
O2 C19 1.385(6) . ? 
N1 C7 1.306(6) . ? 
N1 C1 1.398(6) . ? 
N2 C20 1.311(6) . ? 
N2 C14 1.403(6) . ? 
N3 C31 1.328(6) . ? 
N3 C27 1.340(6) . ? 
C1 C6 1.386(6) . ? 
C1 C2 1.391(6) . ? 
C2 C3 1.386(7) . ? 
C2 H2A 0.9500 . ? 
C3 C4 1.387(7) . ? 
C3 H3A 0.9500 . ? 
C4 C5 1.378(7) . ? 
C4 H4A 0.9500 . ? 
C5 C6 1.375(6) . ? 
C5 H5A 0.9500 . ? 
C7 C8 1.434(6) . ? 
C8 C9 1.402(6) . ? 
C8 C13 1.404(6) . ? 
C9 C10 1.367(6) . ? 
C9 H9A 0.9500 . ? 
C10 C11 1.368(7) . ? 
C11 C12 1.394(6) . ? 
C11 H11A 0.9500 . ? 
C12 C13 1.382(6) . ? 
C14 C19 1.385(7) . ? 
C14 C15 1.384(6) . ? 
C15 C16 1.386(7) . ? 
C15 H15A 0.9500 . ? 
C16 C17 1.397(8) . ? 
C16 H16A 0.9500 . ? 
C17 C18 1.387(8) . ? 
C17 H17A 0.9500 . ? 
C18 C19 1.375(7) . ? 
C18 H18A 0.9500 . ? 
C20 C21 1.439(6) . ? 
C21 C22 1.397(6) . ? 
C21 C26 1.400(7) . ? 
C22 C23 1.376(7) . ? 
C22 H22A 0.9500 . ? 
C23 C24 1.373(7) . ? 
C24 C25 1.386(6) . ? 
C24 H24A 0.9500 . ? 
C25 C26 1.389(6) . ? 
C27 C28 1.387(6) . ? 
C27 H27A 0.9500 . ? 
C28 C29 1.373(7) . ? 
C28 H28A 0.9500 . ? 
C29 C30 1.395(7) . ? 
C29 C32 1.497(6) . ? 
C30 C31 1.385(6) . ? 
C30 H30A 0.9500 . ? 
C31 H31A 0.9500 . ? 
C32 H32A 0.9800 . ? 
C32 H32B 0.9800 . ? 
C32 H32C 0.9800 . ? 
C33 C33 1.523(13) 2_455 ? 
C33 C34 1.501(9) . ? 
C33 H33A 0.9900 . ? 
C33 H33B 0.9900 . ? 
C34 C35 1.498(10) . ? 
C34 H34A 0.9900 . ? 
C34 H34B 0.9900 . ? 
C35 H35A 0.9800 . ? 
C35 H35B 0.9800 . ? 
C35 H35C 0.9800 . ? 
  
loop_ 
_geom_angle_atom_site_label_1 
_geom_angle_atom_site_label_2 
_geom_angle_atom_site_label_3 
_geom_angle 
_geom_angle_site_symmetry_1 
_geom_angle_site_symmetry_3 
_geom_angle_publ_flag 
C26 Ir C13 88.14(17) . . ? 
C26 Ir N2 79.48(17) . . ? 
C13 Ir N2 97.13(16) . . ? 
C26 Ir N1 95.54(17) . . ? 
C13 Ir N1 79.93(16) . . ? 
N2 Ir N1 174.35(14) . . ? 
C26 Ir N3 176.33(16) . . ? 
C13 Ir N3 89.73(15) . . ? 
N2 Ir N3 97.82(14) . . ? 
N1 Ir N3 87.03(14) . . ? 
C26 Ir I 90.98(12) . . ? 
C13 Ir I 177.91(13) . . ? 
N2 Ir I 84.57(10) . . ? 
N1 Ir I 98.27(10) . . ? 
N3 Ir I 91.24(9) . . ? 
C7 O1 C6 104.3(3) . . ? 
C20 O2 C19 104.3(4) . . ? 
C7 N1 C1 105.1(4) . . ? 
C7 N1 Ir 113.1(3) . . ? 
C1 N1 Ir 141.4(3) . . ? 
C20 N2 C14 105.6(4) . . ? 
C20 N2 Ir 113.7(3) . . ? 
C14 N2 Ir 140.0(3) . . ? 
C31 N3 C27 117.3(4) . . ? 
C31 N3 Ir 122.5(3) . . ? 
C27 N3 Ir 120.1(3) . . ? 
C6 C1 N1 107.5(4) . . ? 
C6 C1 C2 119.3(4) . . ? 
N1 C1 C2 133.2(4) . . ? 
C3 C2 C1 116.4(5) . . ? 
C3 C2 H2A 121.8 . . ? 
C1 C2 H2A 121.8 . . ? 
C2 C3 C4 122.8(5) . . ? 
C2 C3 H3A 118.6 . . ? 
C4 C3 H3A 118.6 . . ? 
C5 C4 C3 121.3(5) . . ? 
C5 C4 H4A 119.4 . . ? 
C3 C4 H4A 119.4 . . ? 
C6 C5 C4 115.3(5) . . ? 
C6 C5 H5A 122.4 . . ? 
C4 C5 H5A 122.4 . . ? 
C5 C6 O1 127.1(4) . . ? 
C5 C6 C1 124.9(4) . . ? 
O1 C6 C1 108.0(4) . . ? 
N1 C7 O1 115.1(4) . . ? 
N1 C7 C8 120.6(4) . . ? 
O1 C7 C8 124.3(4) . . ? 
C9 C8 C13 124.1(4) . . ? 
C9 C8 C7 123.6(4) . . ? 
C13 C8 C7 112.2(4) . . ? 
C10 C9 C8 116.5(4) . . ? 
C10 C9 H9A 121.8 . . ? 
C8 C9 H9A 121.8 . . ? 
F1 C10 C11 118.3(4) . . ? 
F1 C10 C9 118.3(4) . . ? 
C11 C10 C9 123.4(4) . . ? 
C10 C11 C12 117.4(4) . . ? 
C10 C11 H11A 121.3 . . ? 
C12 C11 H11A 121.3 . . ? 
F2 C12 C13 120.1(4) . . ? 
F2 C12 C11 115.8(4) . . ? 
C13 C12 C11 124.0(4) . . ? 
C12 C13 C8 114.5(4) . . ? 
C12 C13 Ir 131.5(3) . . ? 
C8 C13 Ir 114.0(3) . . ? 
C19 C14 C15 120.3(4) . . ? 
C19 C14 N2 106.6(4) . . ? 
C15 C14 N2 133.1(4) . . ? 
C16 C15 C14 116.9(5) . . ? 
C16 C15 H15A 121.5 . . ? 
C14 C15 H15A 121.5 . . ? 
C15 C16 C17 121.8(5) . . ? 
C15 C16 H16A 119.1 . . ? 
C17 C16 H16A 119.1 . . ? 
C16 C17 C18 121.5(5) . . ? 
C16 C17 H17A 119.3 . . ? 
C18 C17 H17A 119.3 . . ? 
C19 C18 C17 115.5(5) . . ? 
C19 C18 H18A 122.2 . . ? 
C17 C18 H18A 122.2 . . ? 
C14 C19 O2 108.8(4) . . ? 
C14 C19 C18 124.0(5) . . ? 
O2 C19 C18 127.2(5) . . ? 
N2 C20 O2 114.6(4) . . ? 
N2 C20 C21 119.9(4) . . ? 
O2 C20 C21 125.3(4) . . ? 
C22 C21 C26 125.6(5) . . ? 
C22 C21 C20 122.9(4) . . ? 
C26 C21 C20 111.5(4) . . ? 
C23 C22 C21 116.1(5) . . ? 
C23 C22 H22A 122.0 . . ? 
C21 C22 H22A 122.0 . . ? 
F3 C23 C24 118.3(4) . . ? 
F3 C23 C22 119.1(5) . . ? 
C24 C23 C22 122.6(4) . . ? 
C23 C24 C25 117.9(4) . . ? 
C23 C24 H24A 121.1 . . ? 
C25 C24 H24A 121.1 . . ? 
F4 C25 C24 115.3(4) . . ? 
F4 C25 C26 120.1(4) . . ? 
C24 C25 C26 124.6(5) . . ? 
C25 C26 C21 113.2(4) . . ? 
C25 C26 Ir 131.4(4) . . ? 
C21 C26 Ir 115.4(3) . . ? 
N3 C27 C28 122.5(4) . . ? 
N3 C27 H27A 118.7 . . ? 
C28 C27 H27A 118.7 . . ? 
C29 C28 C27 120.6(4) . . ? 
C29 C28 H28A 119.7 . . ? 
C27 C28 H28A 119.7 . . ? 
C28 C29 C30 116.6(4) . . ? 
C28 C29 C32 121.1(5) . . ? 
C30 C29 C32 122.4(5) . . ? 
C31 C30 C29 119.6(4) . . ? 
C31 C30 H30A 120.2 . . ? 
C29 C30 H30A 120.2 . . ? 
N3 C31 C30 123.3(4) . . ? 
N3 C31 H31A 118.3 . . ? 
C30 C31 H31A 118.3 . . ? 
C29 C32 H32A 109.5 . . ? 
C29 C32 H32B 109.5 . . ? 
H32A C32 H32B 109.5 . . ? 
C29 C32 H32C 109.5 . . ? 
H32A C32 H32C 109.5 . . ? 
H32B C32 H32C 109.5 . . ? 
C33 C33 C34 113.4(7) 2_455 . ? 
C33 C33 H33A 108.9 2_455 . ? 
C34 C33 H33A 108.9 . . ? 
C33 C33 H33B 108.9 2_455 . ? 
C34 C33 H33B 108.9 . . ? 
H33A C33 H33B 107.7 . . ? 
C35 C34 C33 113.8(7) . . ? 
C35 C34 H34A 108.8 . . ? 
C33 C34 H34A 108.8 . . ? 
C35 C34 H34B 108.8 . . ? 
C33 C34 H34B 108.8 . . ? 
H34A C34 H34B 107.7 . . ? 
C34 C35 H35A 109.5 . . ? 
C34 C35 H35B 109.5 . . ? 
H35A C35 H35B 109.5 . . ? 
C34 C35 H35C 109.5 . . ? 
H35A C35 H35C 109.5 . . ? 
H35B C35 H35C 109.5 . . ? 
  
_diffrn_measured_fraction_theta_max 0.850 
_diffrn_reflns_theta_full        26.00 
_diffrn_measured_fraction_theta_full 0.999 
_refine_diff_density_max         1.809 
_refine_diff_density_min         -2.395 
_refine_diff_density_rms         0.150 
  
