# Supplementary material
Source: MDPI journal article supplement (https://www.mdpi.com/2304-6740/6/4/118)
Supplement: s1 [file s1 › inorganics-371116-supplementary/9. 4cn.cif]

 
data_4cn 
  
_audit_creation_method           SHELXL-97 
_chemical_name_systematic        ? 
_chemical_name_common            ? 
_chemical_formula_moiety         'C32 H16 F4 I Ir N4 O2, 2(C H2 Cl2)' 
_chemical_formula_sum            'C34 H20 Cl4 F4 I Ir N4 O2' 
_chemical_melting_point          ? 
  
_exptl_crystal_description       parallelepiped 
_exptl_crystal_colour            yellow 
  
_diffrn_ambient_temperature      110(2) 
_chemical_formula_weight         1053.44 
  
loop_ 
_atom_type_symbol 
_atom_type_description 
_atom_type_scat_dispersion_real 
_atom_type_scat_dispersion_imag 
_atom_type_scat_source 
C C 0.0033 0.0016 'International Tables Vol C Tables 4.2.6.8 and 6.1.1.4' 
H H 0.0000 0.0000 'International Tables Vol C Tables 4.2.6.8 and 6.1.1.4' 
N N 0.0061 0.0033 'International Tables Vol C Tables 4.2.6.8 and 6.1.1.4' 
O O 0.0106 0.0060 'International Tables Vol C Tables 4.2.6.8 and 6.1.1.4' 
F F 0.0171 0.0103 'International Tables Vol C Tables 4.2.6.8 and 6.1.1.4' 
Cl Cl 0.1484 0.1585 'International Tables Vol C Tables 4.2.6.8 and 6.1.1.4' 
I I -0.4742 1.8119 'International Tables Vol C Tables 4.2.6.8 and 6.1.1.4' 
Ir Ir -1.4442 7.9887 'International Tables Vol C Tables 4.2.6.8 and 6.1.1.4' 
  
_symmetry_cell_setting           triclinic 
_symmetry_space_group_name_H-M   'P -1' 
_symmetry_int_tables_number      2 
_chemical_absolute_configuration ? 
  
loop_ 
_symmetry_equiv_pos_as_xyz 
'x, y, z' 
'-x, -y, -z' 
  
_cell_length_a                   11.8797(4) 
_cell_length_b                   12.1298(4) 
_cell_length_c                   12.8946(4) 
_cell_angle_alpha                88.936(2) 
_cell_angle_beta                 86.581(2) 
_cell_angle_gamma                68.125(3) 
_cell_volume                     1721.22(10) 
_cell_formula_units_Z            2 
_cell_measurement_temperature    110(2) 
_cell_measurement_reflns_used    10648 
_cell_measurement_theta_min      3.0259 
_cell_measurement_theta_max      29.1850 
_exptl_crystal_size_max          0.76 
_exptl_crystal_size_mid          0.60 
_exptl_crystal_size_min          0.36 
_exptl_crystal_density_meas      ? 
_exptl_crystal_density_diffrn    2.033 
_exptl_crystal_density_method    'not measured' 
_exptl_crystal_F_000             1004 
_exptl_absorpt_coefficient_mu    5.147 
_exptl_absorpt_correction_type   multi-scan 
_exptl_absorpt_correction_T_min  0.33993 
_exptl_absorpt_correction_T_max  1.00000 
_exptl_absorpt_process_details 
; 
CrysAlisPro, Oxford Diffraction Ltd., 
Version 1.171.33.66 (release 28-04-2010 CrysAlis171 .NET) 
(compiled Apr 28 2010,14:27:37) 
Empirical absorption correction using spherical harmonics, 
 implemented in SCALE3 ABSPACK scaling algorithm. 
; 
  
_exptl_special_details 
; 
 ? 
; 
_diffrn_radiation_probe          x-ray 
_diffrn_radiation_type           MoK\a 
_diffrn_radiation_wavelength     0.71073 
_diffrn_source                   'fine-focus sealed tube' 
_diffrn_radiation_monochromator  graphite 
_diffrn_measurement_device_type  'CCD detector' 
_diffrn_measurement_method       '\w scans' 
_diffrn_detector_area_resol_mean ? 
_diffrn_reflns_number            15110 
_diffrn_reflns_av_R_equivalents  0.0210 
_diffrn_reflns_av_sigmaI/netI    0.0334 
_diffrn_reflns_limit_h_min       -16 
_diffrn_reflns_limit_h_max       16 
_diffrn_reflns_limit_k_min       -15 
_diffrn_reflns_limit_k_max       15 
_diffrn_reflns_limit_l_min       -17 
_diffrn_reflns_limit_l_max       17 
_diffrn_reflns_theta_min         3.03 
_diffrn_reflns_theta_max         29.25 
_reflns_number_total             7983 
_reflns_number_gt                7055 
_reflns_threshold_expression     >2sigma(I) 
  
_computing_data_collection 
; 
CrysAlis CCD, Oxford Diffraction Ltd., 
Version 1.171.32.29 (release 10-06-2008 CrysAlis171 .NET) 
(compiled Jun 10 2008,16:49:55) 
; 
_computing_cell_refinement 
; 
CrysAlis RED, Oxford Diffraction Ltd., 
Version 1.171.32.29 (release 10-06-2008 CrysAlis171 .NET) 
(compiled Jun 10 2008,16:49:55) 
; 
_computing_data_reduction 
; 
CrysAlis RED, Oxford Diffraction Ltd., 
Version 1.171.32.29 (release 10-06-2008 CrysAlis171 .NET) 
(compiled Jun 10 2008,16:49:55) 
; 
_computing_structure_solution    'SHELXS-97 (Sheldrick, 2008)' 
_computing_structure_refinement  'SHELXL-97 (Sheldrick, 2008)' 
_computing_molecular_graphics    'Bruker SHELXTL' 
_computing_publication_material  'Bruker SHELXTL' 
  
_refine_special_details 
; 
 Refinement of F^2^ against ALL reflections.  The weighted R-factor wR and 
 goodness of fit S are based on F^2^, conventional R-factors R are based 
 on F, with F set to zero for negative F^2^. The threshold expression of 
 F^2^ > 2sigma(F^2^) is used only for calculating R-factors(gt) etc. and is 
 not relevant to the choice of reflections for refinement.  R-factors based 
 on F^2^ are statistically about twice as large as those based on F, and R- 
 factors based on ALL data will be even larger. 
; 
  
_refine_ls_structure_factor_coef Fsqd 
_refine_ls_matrix_type           full 
_refine_ls_weighting_scheme      calc 
_refine_ls_weighting_details 
'calc w=1/[\s^2^(Fo^2^)+(0.0327P)^2^+0.0000P] where P=(Fo^2^+2Fc^2^)/3' 
_atom_sites_solution_primary     direct 
_atom_sites_solution_secondary   difmap 
_atom_sites_solution_hydrogens   geom 
_refine_ls_hydrogen_treatment    mixed 
_refine_ls_extinction_method     none 
_refine_ls_extinction_coef       ? 
_refine_ls_number_reflns         7983 
_refine_ls_number_parameters     463 
_refine_ls_number_restraints     0 
_refine_ls_R_factor_all          0.0286 
_refine_ls_R_factor_gt           0.0236 
_refine_ls_wR_factor_ref         0.0558 
_refine_ls_wR_factor_gt          0.0549 
_refine_ls_goodness_of_fit_ref   1.012 
_refine_ls_restrained_S_all      1.012 
_refine_ls_shift/su_max          0.004 
_refine_ls_shift/su_mean         0.000 
  
loop_ 
_atom_site_label 
_atom_site_type_symbol 
_atom_site_fract_x 
_atom_site_fract_y 
_atom_site_fract_z 
_atom_site_U_iso_or_equiv 
_atom_site_adp_type 
_atom_site_occupancy 
_atom_site_symmetry_multiplicity 
_atom_site_calc_flag 
_atom_site_refinement_flags 
_atom_site_disorder_assembly 
_atom_site_disorder_group 
Ir Ir 0.409403(11) 0.281448(10) 1.319888(9) 0.00860(4) Uani 1 1 d . . . 
I I 0.378931(19) 0.512679(16) 1.354894(15) 0.01307(5) Uani 1 1 d . . . 
F1 F -0.09017(18) 0.42091(19) 1.12823(16) 0.0273(5) Uani 1 1 d . . . 
F2 F 0.12418(18) 0.33416(18) 1.43050(14) 0.0230(4) Uani 1 1 d . . . 
F3 F 0.3832(2) -0.21603(17) 1.28607(17) 0.0301(5) Uani 1 1 d . . . 
F4 F 0.48443(19) 0.08114(17) 1.11754(14) 0.0216(4) Uani 1 1 d . . . 
O1 O 0.3582(2) 0.3634(2) 1.01249(16) 0.0153(5) Uani 1 1 d . . . 
O2 O 0.3219(2) 0.10578(19) 1.56736(16) 0.0152(5) Uani 1 1 d . . . 
N1 N 0.4353(2) 0.3183(2) 1.16842(19) 0.0102(5) Uani 1 1 d . . . 
N2 N 0.3698(2) 0.2360(2) 1.46829(19) 0.0117(5) Uani 1 1 d . . . 
N3 N 0.5981(2) 0.2181(2) 1.35212(19) 0.0117(5) Uani 1 1 d . . . 
N4 N 1.0759(3) 0.0639(3) 1.4027(3) 0.0415(9) Uani 1 1 d . . . 
C1 C 0.5287(3) 0.3255(3) 1.0990(2) 0.0115(6) Uani 1 1 d . . . 
C2 C 0.6461(3) 0.3166(3) 1.1114(2) 0.0138(6) Uani 1 1 d . . . 
H2A H 0.6807 0.3007 1.1772 0.017 Uiso 1 1 calc R . . 
C3 C 0.7115(3) 0.3320(3) 1.0231(2) 0.0165(7) Uani 1 1 d . . . 
H3A H 0.7927 0.3267 1.0285 0.020 Uiso 1 1 calc R . . 
C4 C 0.6604(3) 0.3549(3) 0.9264(2) 0.0173(7) Uani 1 1 d . . . 
H4A H 0.7089 0.3623 0.8674 0.021 Uiso 1 1 calc R . . 
C5 C 0.5422(3) 0.3672(3) 0.9140(2) 0.0162(7) Uani 1 1 d . . . 
H5A H 0.5065 0.3851 0.8487 0.019 Uiso 1 1 calc R . . 
C6 C 0.4789(3) 0.3518(3) 1.0023(2) 0.0124(6) Uani 1 1 d . . . 
C7 C 0.3394(3) 0.3433(3) 1.1143(2) 0.0125(6) Uani 1 1 d . . . 
C8 C 0.2261(3) 0.3530(3) 1.1647(2) 0.0125(6) Uani 1 1 d . . . 
C9 C 0.1185(3) 0.3829(3) 1.1137(3) 0.0173(7) Uani 1 1 d . . . 
H9A H 0.1161 0.3958 1.0408 0.021 Uiso 1 1 calc R . . 
C10 C 0.0164(3) 0.3928(3) 1.1743(3) 0.0190(7) Uani 1 1 d . . . 
C11 C 0.0182(3) 0.3762(3) 1.2803(3) 0.0190(7) Uani 1 1 d . . . 
H11A H -0.0540 0.3844 1.3206 0.023 Uiso 1 1 calc R . . 
C12 C 0.1273(3) 0.3476(3) 1.3264(2) 0.0156(7) Uani 1 1 d . . . 
C13 C 0.2365(3) 0.3335(3) 1.2728(2) 0.0118(6) Uani 1 1 d . . . 
C14 C 0.3400(3) 0.2844(3) 1.5691(2) 0.0127(6) Uani 1 1 d . . . 
C15 C 0.3376(3) 0.3880(3) 1.6135(2) 0.0155(7) Uani 1 1 d . . . 
H15A H 0.3584 0.4454 1.5741 0.019 Uiso 1 1 calc R . . 
C16 C 0.3036(3) 0.4041(3) 1.7184(2) 0.0200(7) Uani 1 1 d . . . 
H16A H 0.3011 0.4743 1.7515 0.024 Uiso 1 1 calc R . . 
C17 C 0.2727(3) 0.3205(3) 1.7770(3) 0.0218(8) Uani 1 1 d . . . 
H17A H 0.2492 0.3358 1.8487 0.026 Uiso 1 1 calc R . . 
C18 C 0.2756(3) 0.2171(3) 1.7339(3) 0.0197(7) Uani 1 1 d . . . 
H18A H 0.2556 0.1595 1.7735 0.024 Uiso 1 1 calc R . . 
C19 C 0.3094(3) 0.2020(3) 1.6292(2) 0.0153(7) Uani 1 1 d . . . 
C20 C 0.3579(3) 0.1336(3) 1.4731(2) 0.0114(6) Uani 1 1 d . . . 
C21 C 0.3822(3) 0.0598(3) 1.3829(2) 0.0127(6) Uani 1 1 d . . . 
C22 C 0.3703(3) -0.0500(3) 1.3824(3) 0.0173(7) Uani 1 1 d . . . 
H22A H 0.3449 -0.0816 1.4434 0.021 Uiso 1 1 calc R . . 
C23 C 0.3968(3) -0.1102(3) 1.2901(3) 0.0190(7) Uani 1 1 d . . . 
C24 C 0.4349(3) -0.0671(3) 1.2012(3) 0.0175(7) Uani 1 1 d . . . 
H24A H 0.4540 -0.1113 1.1382 0.021 Uiso 1 1 calc R . . 
C25 C 0.4444(3) 0.0422(3) 1.2065(2) 0.0152(7) Uani 1 1 d . . . 
C26 C 0.4182(3) 0.1131(3) 1.2957(2) 0.0118(6) Uani 1 1 d . . . 
C27 C 0.6782(3) 0.1240(3) 1.2980(2) 0.0141(6) Uani 1 1 d . . . 
H27A H 0.6480 0.0856 1.2494 0.017 Uiso 1 1 calc R . . 
C28 C 0.8008(3) 0.0818(3) 1.3102(3) 0.0170(7) Uani 1 1 d . . . 
H28A H 0.8541 0.0157 1.2706 0.020 Uiso 1 1 calc R . . 
C29 C 0.8461(3) 0.1371(3) 1.3812(3) 0.0177(7) Uani 1 1 d . . . 
C30 C 0.7644(3) 0.2322(3) 1.4389(2) 0.0182(7) Uani 1 1 d . . . 
H30A H 0.7926 0.2705 1.4893 0.022 Uiso 1 1 calc R . . 
C31 C 0.6428(3) 0.2701(3) 1.4224(2) 0.0140(6) Uani 1 1 d . . . 
H31A H 0.5878 0.3353 1.4619 0.017 Uiso 1 1 calc R . . 
C32 C 0.9743(3) 0.0965(3) 1.3938(3) 0.0257(8) Uani 1 1 d . . . 
Cl1 Cl 1.00221(10) -0.11252(10) 0.89794(9) 0.0443(3) Uani 1 1 d . . . 
Cl2 Cl 0.76167(12) -0.02784(17) 1.00192(10) 0.0768(5) Uani 1 1 d . . . 
C33 C 0.8539(4) -0.0149(7) 0.8950(5) 0.091(3) Uani 1 1 d . . . 
H33A H 0.8196 -0.0287 0.8306 0.110 Uiso 1 1 calc R . . 
H33B H 0.8525 0.0673 0.8925 0.110 Uiso 1 1 calc R . . 
Cl3 Cl 0.98556(11) 0.27620(14) 1.85518(10) 0.0634(4) Uani 1 1 d . A . 
Cl4 Cl 0.99291(17) 0.22226(14) 1.63019(15) 0.0429(5) Uani 0.743(3) 1 d P A 1 
Cl4' Cl 0.9413(5) 0.2030(4) 1.6749(4) 0.0429(5) Uani 0.257(3) 1 d P A 2 
C34 C 0.9611(4) 0.3290(4) 1.7282(3) 0.0311(9) Uani 1 1 d . . . 
H34A H 1.020(5) 0.366(4) 1.711(4) 0.063(17) Uiso 1 1 d . . . 
H34B H 0.887(4) 0.371(4) 1.728(3) 0.031(12) Uiso 1 1 d . . . 
  
loop_ 
_atom_site_aniso_label 
_atom_site_aniso_U_11 
_atom_site_aniso_U_22 
_atom_site_aniso_U_33 
_atom_site_aniso_U_23 
_atom_site_aniso_U_13 
_atom_site_aniso_U_12 
Ir 0.00726(6) 0.00968(6) 0.00905(6) -0.00047(4) -0.00080(4) -0.00330(4) 
I 0.01572(11) 0.01022(10) 0.01360(10) -0.00021(7) -0.00340(8) -0.00482(8) 
F1 0.0102(10) 0.0423(13) 0.0284(11) -0.0069(9) -0.0066(9) -0.0074(9) 
F2 0.0147(11) 0.0377(12) 0.0149(10) 0.0034(8) 0.0005(8) -0.0080(9) 
F3 0.0410(14) 0.0140(10) 0.0395(13) -0.0050(9) 0.0008(11) -0.0152(10) 
F4 0.0317(12) 0.0226(10) 0.0135(9) -0.0060(8) 0.0065(8) -0.0144(9) 
O1 0.0147(12) 0.0234(12) 0.0084(10) -0.0004(9) -0.0022(9) -0.0075(10) 
O2 0.0147(12) 0.0186(12) 0.0127(11) 0.0022(9) 0.0001(9) -0.0069(10) 
N1 0.0093(13) 0.0117(12) 0.0093(12) -0.0015(9) -0.0021(10) -0.0030(10) 
N2 0.0102(14) 0.0132(13) 0.0102(12) -0.0012(10) -0.0014(10) -0.0026(11) 
N3 0.0097(13) 0.0144(13) 0.0118(12) 0.0027(10) -0.0016(10) -0.0053(11) 
N4 0.0158(18) 0.041(2) 0.065(3) -0.0062(18) -0.0066(17) -0.0062(16) 
C1 0.0121(16) 0.0108(14) 0.0109(14) -0.0006(11) -0.0001(12) -0.0036(12) 
C2 0.0124(16) 0.0147(15) 0.0145(15) 0.0024(12) -0.0043(13) -0.0048(13) 
C3 0.0111(16) 0.0198(17) 0.0189(16) 0.0008(13) -0.0005(13) -0.0062(13) 
C4 0.0158(18) 0.0210(17) 0.0132(15) 0.0005(13) 0.0030(13) -0.0052(14) 
C5 0.0191(18) 0.0170(16) 0.0108(15) -0.0042(12) -0.0009(13) -0.0046(14) 
C6 0.0128(16) 0.0128(15) 0.0135(15) -0.0013(11) -0.0008(12) -0.0069(13) 
C7 0.0120(16) 0.0113(14) 0.0141(15) -0.0028(11) -0.0018(12) -0.0040(12) 
C8 0.0113(16) 0.0114(15) 0.0149(15) -0.0038(11) -0.0030(12) -0.0039(12) 
C9 0.0135(17) 0.0212(17) 0.0147(16) -0.0040(13) -0.0025(13) -0.0032(14) 
C10 0.0114(17) 0.0209(17) 0.0241(18) -0.0057(13) -0.0054(14) -0.0043(14) 
C11 0.0067(16) 0.0212(17) 0.0274(19) -0.0007(14) 0.0021(14) -0.0038(14) 
C12 0.0139(17) 0.0179(16) 0.0149(15) -0.0013(12) -0.0013(13) -0.0055(13) 
C13 0.0087(15) 0.0104(14) 0.0159(15) -0.0015(11) -0.0040(12) -0.0026(12) 
C14 0.0077(15) 0.0193(16) 0.0105(14) 0.0005(12) 0.0004(12) -0.0045(13) 
C15 0.0119(16) 0.0184(16) 0.0160(16) -0.0034(12) -0.0006(13) -0.0052(13) 
C16 0.0152(18) 0.0309(19) 0.0127(16) -0.0081(14) -0.0001(13) -0.0068(15) 
C17 0.0134(18) 0.039(2) 0.0122(16) -0.0058(14) 0.0001(13) -0.0084(16) 
C18 0.0118(17) 0.0305(19) 0.0150(16) 0.0054(14) -0.0001(13) -0.0063(15) 
C19 0.0112(16) 0.0190(16) 0.0136(15) -0.0003(12) -0.0019(13) -0.0029(13) 
C20 0.0085(15) 0.0149(15) 0.0111(14) 0.0018(11) -0.0001(12) -0.0050(12) 
C21 0.0078(15) 0.0124(15) 0.0166(16) 0.0036(12) -0.0016(12) -0.0023(12) 
C22 0.0119(17) 0.0144(16) 0.0253(18) 0.0037(13) -0.0021(14) -0.0046(13) 
C23 0.0141(17) 0.0095(15) 0.034(2) -0.0017(13) -0.0054(15) -0.0041(13) 
C24 0.0165(18) 0.0134(15) 0.0220(17) -0.0055(13) -0.0020(14) -0.0046(13) 
C25 0.0147(17) 0.0166(16) 0.0139(15) -0.0025(12) 0.0006(13) -0.0055(13) 
C26 0.0056(15) 0.0127(15) 0.0152(15) 0.0002(12) 0.0018(12) -0.0015(12) 
C27 0.0123(16) 0.0121(15) 0.0189(16) -0.0002(12) -0.0014(13) -0.0056(13) 
C28 0.0117(17) 0.0133(15) 0.0236(17) 0.0016(13) 0.0034(14) -0.0026(13) 
C29 0.0115(17) 0.0200(17) 0.0216(17) 0.0051(13) -0.0028(13) -0.0059(14) 
C30 0.0172(18) 0.0222(17) 0.0160(16) -0.0002(13) -0.0069(13) -0.0074(14) 
C31 0.0149(17) 0.0161(16) 0.0128(15) -0.0003(12) -0.0010(13) -0.0078(13) 
C32 0.0165(19) 0.028(2) 0.031(2) -0.0004(15) -0.0047(16) -0.0053(16) 
Cl1 0.0294(6) 0.0488(7) 0.0486(7) 0.0034(5) -0.0020(5) -0.0077(5) 
Cl2 0.0305(7) 0.1479(15) 0.0424(7) 0.0191(8) -0.0013(6) -0.0231(8) 
C33 0.020(3) 0.153(7) 0.069(4) 0.064(4) -0.002(3) 0.001(3) 
Cl3 0.0237(6) 0.1144(12) 0.0409(7) 0.0242(7) 0.0034(5) -0.0148(7) 
Cl4 0.0351(10) 0.0336(7) 0.0512(11) -0.0116(7) -0.0203(8) 0.0005(7) 
Cl4' 0.0351(10) 0.0336(7) 0.0512(11) -0.0116(7) -0.0203(8) 0.0005(7) 
C34 0.019(2) 0.032(2) 0.038(2) 0.0005(17) -0.0090(18) -0.0025(19) 
  
_geom_special_details 
; 
 All esds (except the esd in the dihedral angle between two l.s. planes) 
 are estimated using the full covariance matrix.  The cell esds are taken 
 into account individually in the estimation of esds in distances, angles 
 and torsion angles; correlations between esds in cell parameters are only 
 used when they are defined by crystal symmetry.  An approximate (isotropic) 
 treatment of cell esds is used for estimating esds involving l.s. planes. 
; 
  
loop_ 
_geom_bond_atom_site_label_1 
_geom_bond_atom_site_label_2 
_geom_bond_distance 
_geom_bond_site_symmetry_2 
_geom_bond_publ_flag 
Ir N1 2.027(2) . ? 
Ir C26 2.034(3) . ? 
Ir C13 2.039(3) . ? 
Ir N2 2.058(2) . ? 
Ir N3 2.146(3) . ? 
Ir I 2.7336(2) . ? 
F1 C10 1.354(4) . ? 
F2 C12 1.349(4) . ? 
F3 C23 1.354(4) . ? 
F4 C25 1.359(4) . ? 
O1 C7 1.352(4) . ? 
O1 C6 1.386(4) . ? 
O2 C20 1.343(3) . ? 
O2 C19 1.382(4) . ? 
N1 C7 1.305(4) . ? 
N1 C1 1.411(4) . ? 
N2 C20 1.301(4) . ? 
N2 C14 1.407(4) . ? 
N3 C31 1.352(4) . ? 
N3 C27 1.355(4) . ? 
N4 C32 1.135(5) . ? 
C1 C2 1.377(4) . ? 
C1 C6 1.393(4) . ? 
C2 C3 1.389(4) . ? 
C2 H2A 0.9500 . ? 
C3 C4 1.397(4) . ? 
C3 H3A 0.9500 . ? 
C4 C5 1.375(5) . ? 
C4 H4A 0.9500 . ? 
C5 C6 1.375(4) . ? 
C5 H5A 0.9500 . ? 
C7 C8 1.424(4) . ? 
C8 C9 1.394(4) . ? 
C8 C13 1.414(4) . ? 
C9 C10 1.370(5) . ? 
C9 H9A 0.9500 . ? 
C10 C11 1.378(5) . ? 
C11 C12 1.379(4) . ? 
C11 H11A 0.9500 . ? 
C12 C13 1.386(4) . ? 
C14 C15 1.381(4) . ? 
C14 C19 1.392(4) . ? 
C15 C16 1.384(4) . ? 
C15 H15A 0.9500 . ? 
C16 C17 1.396(5) . ? 
C16 H16A 0.9500 . ? 
C17 C18 1.370(5) . ? 
C17 H17A 0.9500 . ? 
C18 C19 1.381(4) . ? 
C18 H18A 0.9500 . ? 
C20 C21 1.429(4) . ? 
C21 C22 1.390(4) . ? 
C21 C26 1.411(4) . ? 
C22 C23 1.366(5) . ? 
C22 H22A 0.9500 . ? 
C23 C24 1.372(5) . ? 
C24 C25 1.376(4) . ? 
C24 H24A 0.9500 . ? 
C25 C26 1.399(4) . ? 
C27 C28 1.370(4) . ? 
C27 H27A 0.9500 . ? 
C28 C29 1.388(5) . ? 
C28 H28A 0.9500 . ? 
C29 C30 1.393(5) . ? 
C29 C32 1.433(5) . ? 
C30 C31 1.372(4) . ? 
C30 H30A 0.9500 . ? 
C31 H31A 0.9500 . ? 
Cl1 C33 1.720(5) . ? 
Cl2 C33 1.752(5) . ? 
C33 H33A 0.9900 . ? 
C33 H33B 0.9900 . ? 
Cl3 C34 1.748(4) . ? 
Cl4 C34 1.748(5) . ? 
Cl4' C34 1.786(7) . ? 
C34 H34A 0.97(5) . ? 
C34 H34B 0.84(4) . ? 
  
loop_ 
_geom_angle_atom_site_label_1 
_geom_angle_atom_site_label_2 
_geom_angle_atom_site_label_3 
_geom_angle 
_geom_angle_site_symmetry_1 
_geom_angle_site_symmetry_3 
_geom_angle_publ_flag 
N1 Ir C26 96.04(11) . . ? 
N1 Ir C13 79.29(11) . . ? 
C26 Ir C13 85.50(12) . . ? 
N1 Ir N2 173.60(10) . . ? 
C26 Ir N2 79.43(11) . . ? 
C13 Ir N2 95.76(11) . . ? 
N1 Ir N3 95.31(10) . . ? 
C26 Ir N3 91.47(11) . . ? 
C13 Ir N3 173.47(11) . . ? 
N2 Ir N3 89.35(10) . . ? 
N1 Ir I 85.09(7) . . ? 
C26 Ir I 175.67(9) . . ? 
C13 Ir I 90.62(8) . . ? 
N2 Ir I 99.09(7) . . ? 
N3 Ir I 92.59(7) . . ? 
C7 O1 C6 104.4(2) . . ? 
C20 O2 C19 104.4(2) . . ? 
C7 N1 C1 106.3(2) . . ? 
C7 N1 Ir 114.5(2) . . ? 
C1 N1 Ir 139.3(2) . . ? 
C20 N2 C14 106.1(3) . . ? 
C20 N2 Ir 113.2(2) . . ? 
C14 N2 Ir 140.4(2) . . ? 
C31 N3 C27 117.5(3) . . ? 
C31 N3 Ir 123.1(2) . . ? 
C27 N3 Ir 119.4(2) . . ? 
C2 C1 C6 120.5(3) . . ? 
C2 C1 N1 133.4(3) . . ? 
C6 C1 N1 106.0(3) . . ? 
C1 C2 C3 116.8(3) . . ? 
C1 C2 H2A 121.6 . . ? 
C3 C2 H2A 121.6 . . ? 
C2 C3 C4 121.4(3) . . ? 
C2 C3 H3A 119.3 . . ? 
C4 C3 H3A 119.3 . . ? 
C5 C4 C3 122.1(3) . . ? 
C5 C4 H4A 119.0 . . ? 
C3 C4 H4A 119.0 . . ? 
C4 C5 C6 115.6(3) . . ? 
C4 C5 H5A 122.2 . . ? 
C6 C5 H5A 122.2 . . ? 
C5 C6 O1 127.5(3) . . ? 
C5 C6 C1 123.5(3) . . ? 
O1 C6 C1 108.9(3) . . ? 
N1 C7 O1 114.3(3) . . ? 
N1 C7 C8 120.0(3) . . ? 
O1 C7 C8 125.7(3) . . ? 
C9 C8 C13 124.9(3) . . ? 
C9 C8 C7 123.8(3) . . ? 
C13 C8 C7 111.2(3) . . ? 
C10 C9 C8 116.5(3) . . ? 
C10 C9 H9A 121.8 . . ? 
C8 C9 H9A 121.8 . . ? 
F1 C10 C9 118.7(3) . . ? 
F1 C10 C11 118.9(3) . . ? 
C9 C10 C11 122.4(3) . . ? 
C12 C11 C10 118.5(3) . . ? 
C12 C11 H11A 120.8 . . ? 
C10 C11 H11A 120.8 . . ? 
F2 C12 C11 116.3(3) . . ? 
F2 C12 C13 119.6(3) . . ? 
C11 C12 C13 124.1(3) . . ? 
C12 C13 C8 113.6(3) . . ? 
C12 C13 Ir 131.8(2) . . ? 
C8 C13 Ir 114.5(2) . . ? 
C15 C14 C19 120.3(3) . . ? 
C15 C14 N2 133.7(3) . . ? 
C19 C14 N2 106.0(3) . . ? 
C14 C15 C16 116.6(3) . . ? 
C14 C15 H15A 121.7 . . ? 
C16 C15 H15A 121.7 . . ? 
C15 C16 C17 122.2(3) . . ? 
C15 C16 H16A 118.9 . . ? 
C17 C16 H16A 118.9 . . ? 
C18 C17 C16 121.6(3) . . ? 
C18 C17 H17A 119.2 . . ? 
C16 C17 H17A 119.2 . . ? 
C17 C18 C19 115.7(3) . . ? 
C17 C18 H18A 122.1 . . ? 
C19 C18 H18A 122.1 . . ? 
C18 C19 O2 127.6(3) . . ? 
C18 C19 C14 123.5(3) . . ? 
O2 C19 C14 108.8(3) . . ? 
N2 C20 O2 114.7(3) . . ? 
N2 C20 C21 120.7(3) . . ? 
O2 C20 C21 124.6(3) . . ? 
C22 C21 C26 124.9(3) . . ? 
C22 C21 C20 123.7(3) . . ? 
C26 C21 C20 111.4(3) . . ? 
C23 C22 C21 116.9(3) . . ? 
C23 C22 H22A 121.6 . . ? 
C21 C22 H22A 121.6 . . ? 
F3 C23 C22 118.5(3) . . ? 
F3 C23 C24 118.8(3) . . ? 
C22 C23 C24 122.7(3) . . ? 
C23 C24 C25 117.8(3) . . ? 
C23 C24 H24A 121.1 . . ? 
C25 C24 H24A 121.1 . . ? 
F4 C25 C24 116.2(3) . . ? 
F4 C25 C26 118.9(3) . . ? 
C24 C25 C26 124.9(3) . . ? 
C25 C26 C21 112.7(3) . . ? 
C25 C26 Ir 132.3(2) . . ? 
C21 C26 Ir 114.8(2) . . ? 
N3 C27 C28 123.0(3) . . ? 
N3 C27 H27A 118.5 . . ? 
C28 C27 H27A 118.5 . . ? 
C27 C28 C29 119.1(3) . . ? 
C27 C28 H28A 120.5 . . ? 
C29 C28 H28A 120.5 . . ? 
C30 C29 C28 118.4(3) . . ? 
C30 C29 C32 121.3(3) . . ? 
C28 C29 C32 120.2(3) . . ? 
C31 C30 C29 119.4(3) . . ? 
C31 C30 H30A 120.3 . . ? 
C29 C30 H30A 120.3 . . ? 
N3 C31 C30 122.5(3) . . ? 
N3 C31 H31A 118.7 . . ? 
C30 C31 H31A 118.7 . . ? 
N4 C32 C29 179.3(4) . . ? 
Cl1 C33 Cl2 113.4(3) . . ? 
Cl1 C33 H33A 108.9 . . ? 
Cl2 C33 H33A 108.9 . . ? 
Cl1 C33 H33B 108.9 . . ? 
Cl2 C33 H33B 108.9 . . ? 
H33A C33 H33B 107.7 . . ? 
Cl4' C34 Cl3 97.3(3) . . ? 
Cl4' C34 Cl4 29.7(2) . . ? 
Cl3 C34 Cl4 116.6(2) . . ? 
Cl4' C34 H34A 132(3) . . ? 
Cl3 C34 H34A 106(3) . . ? 
Cl4 C34 H34A 103(3) . . ? 
Cl4' C34 H34B 93(3) . . ? 
Cl3 C34 H34B 106(3) . . ? 
Cl4 C34 H34B 107(3) . . ? 
H34A C34 H34B 119(4) . . ? 
  
_diffrn_measured_fraction_theta_max 0.851 
_diffrn_reflns_theta_full        26.00 
_diffrn_measured_fraction_theta_full 0.999 
_refine_diff_density_max         1.530 
_refine_diff_density_min         -1.268 
_refine_diff_density_rms         0.125 
  
